# Supplementary material for: MiRImpact, a new bioinformatic method using complete microRNA expression profiles to assess their overall influence on the activity of intracellular molecular pathways
Source: PubMed Central journal article supplement — Cell Cycle. 2016 Mar 30;15(5):689–98. doi: 10.1080/15384101.2016.1147633 (PMC4845938; doi:10.1080/15384101.2016.1147633), 2016-03-30

# Sample 1 Diana TarBase

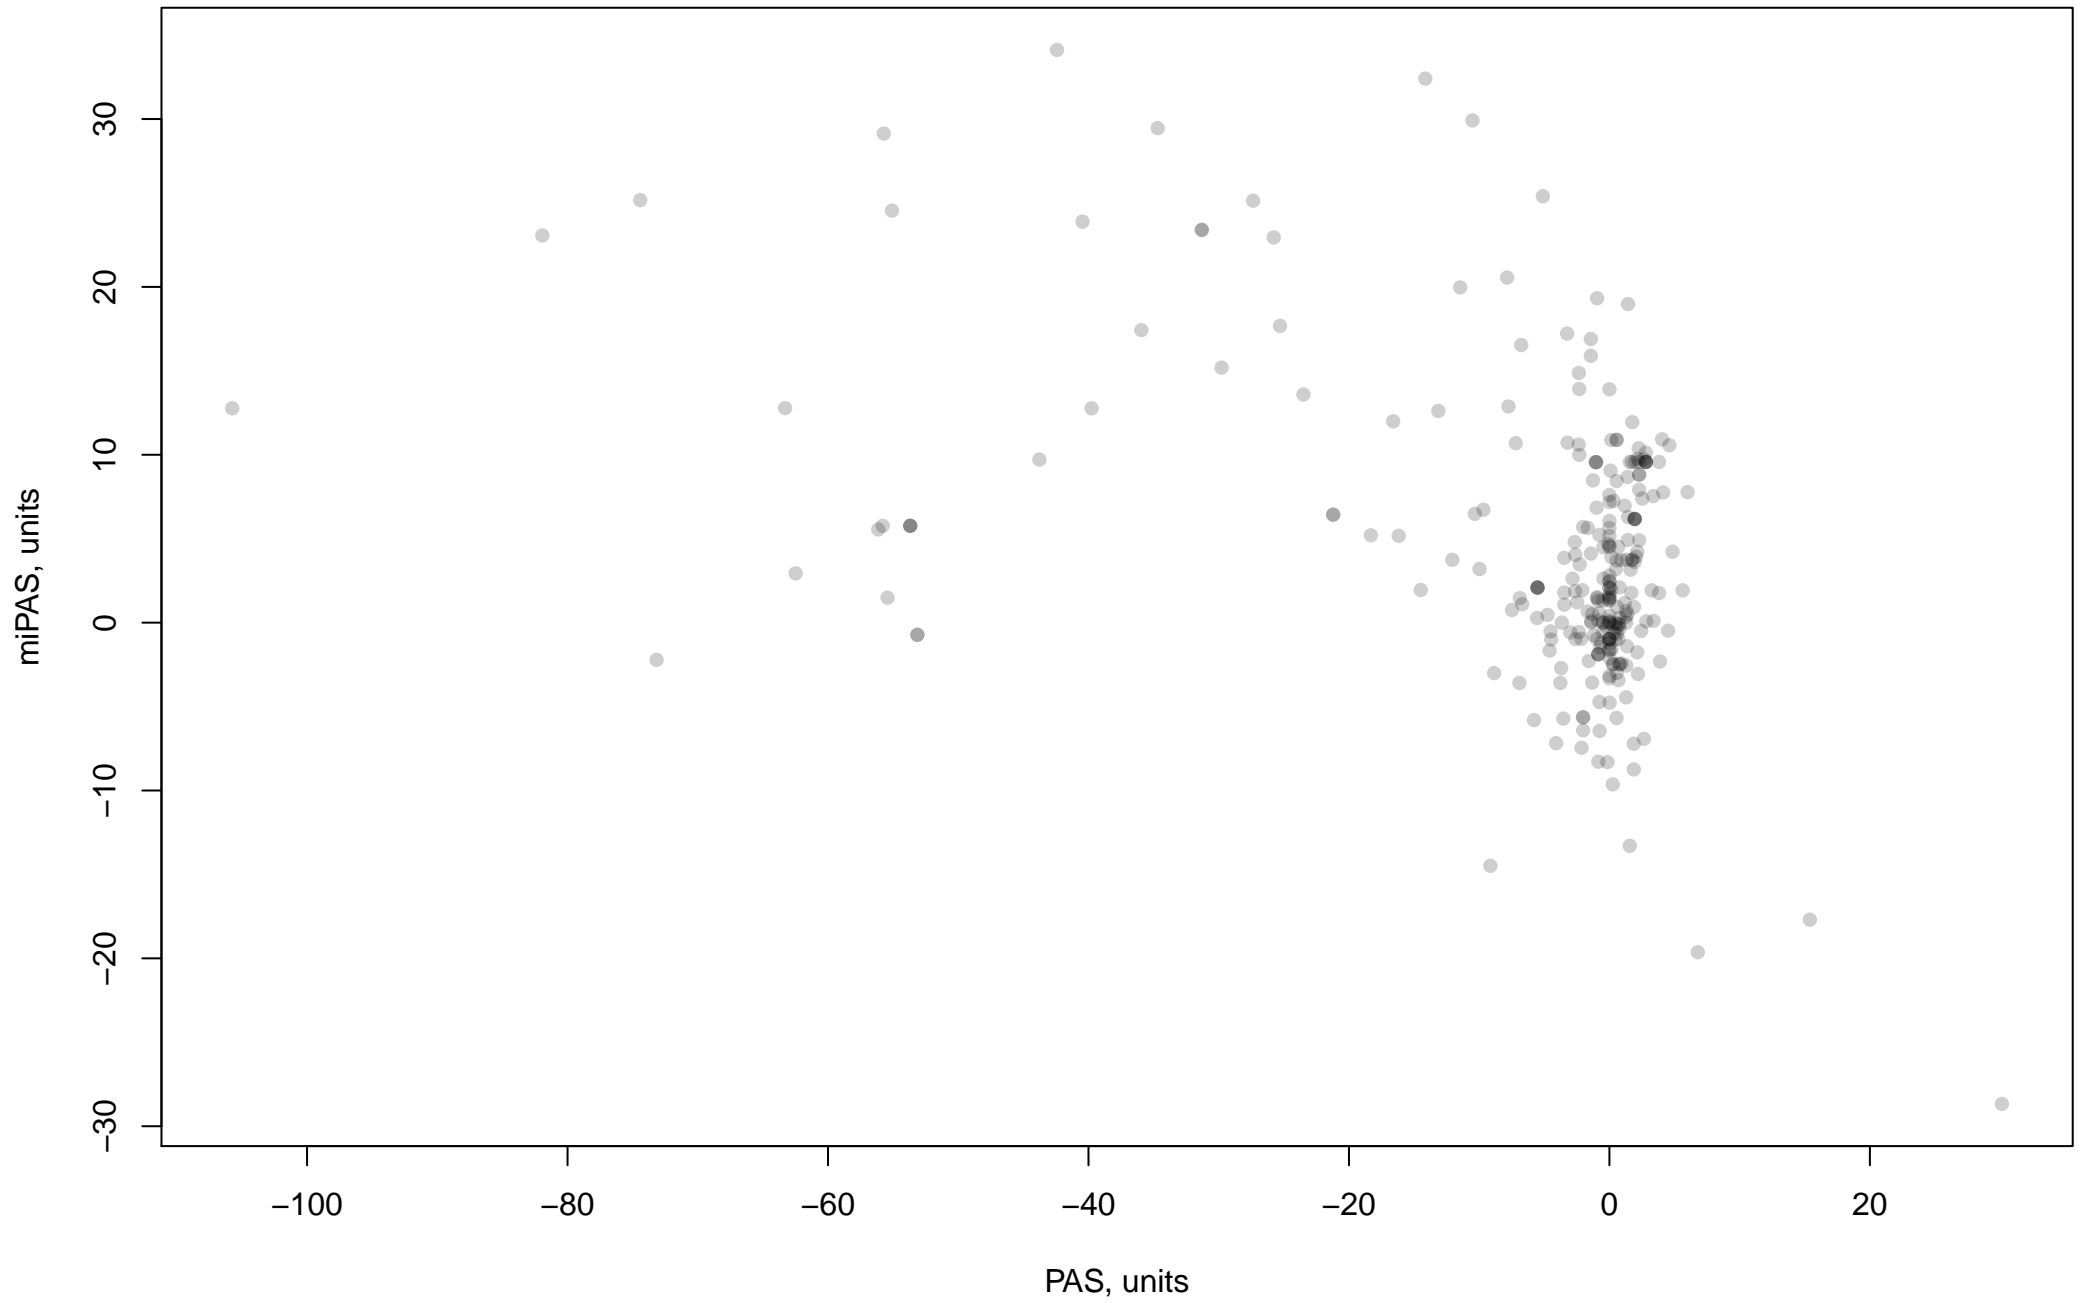

### Sample 2 Diana TarBase

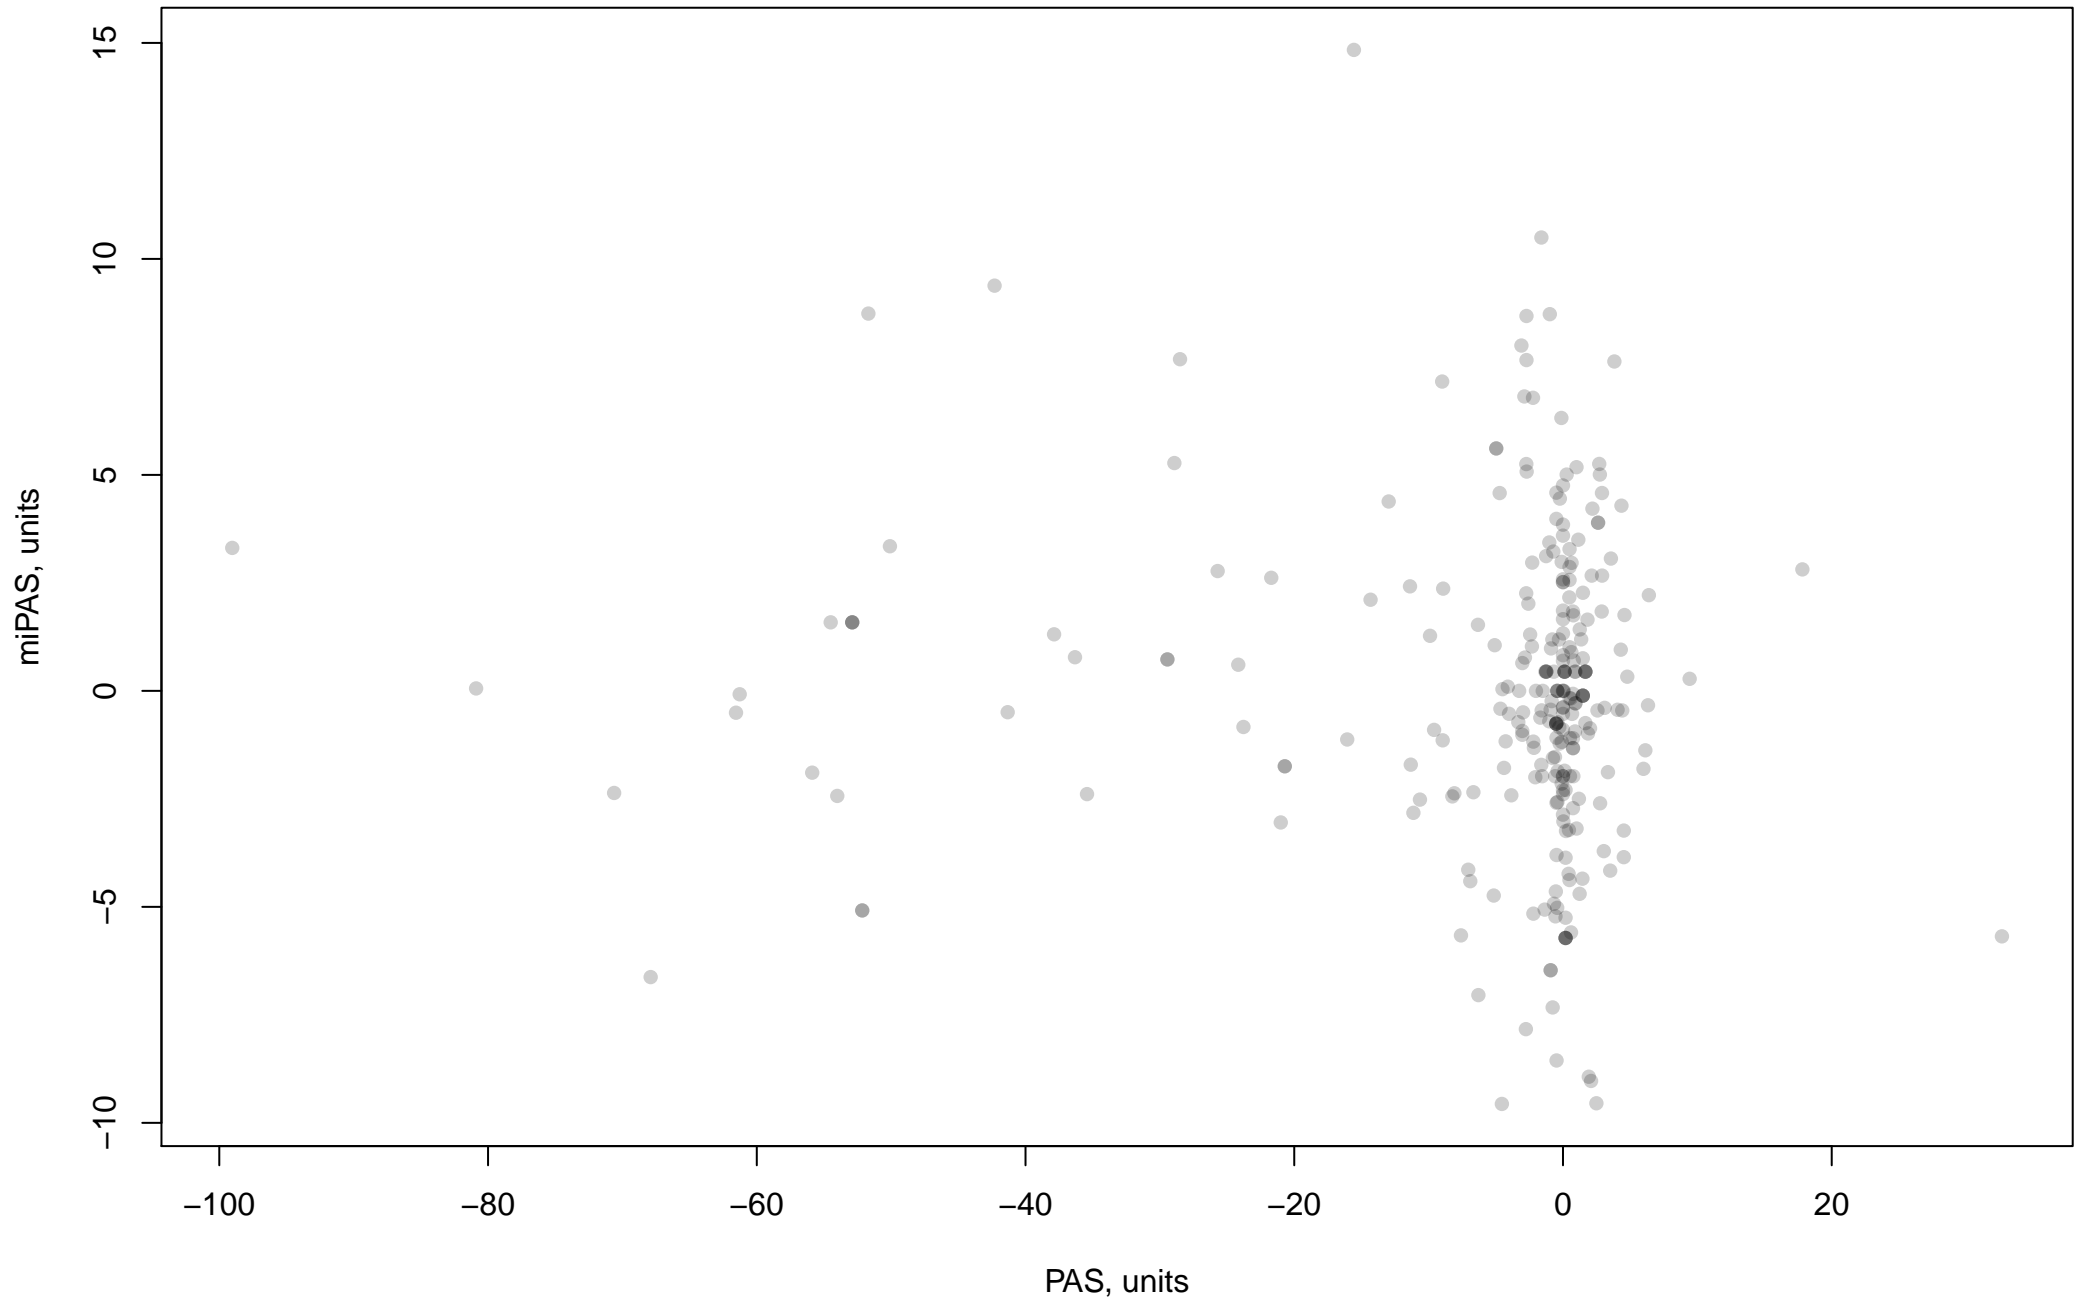

### Sample 3 Diana TarBase

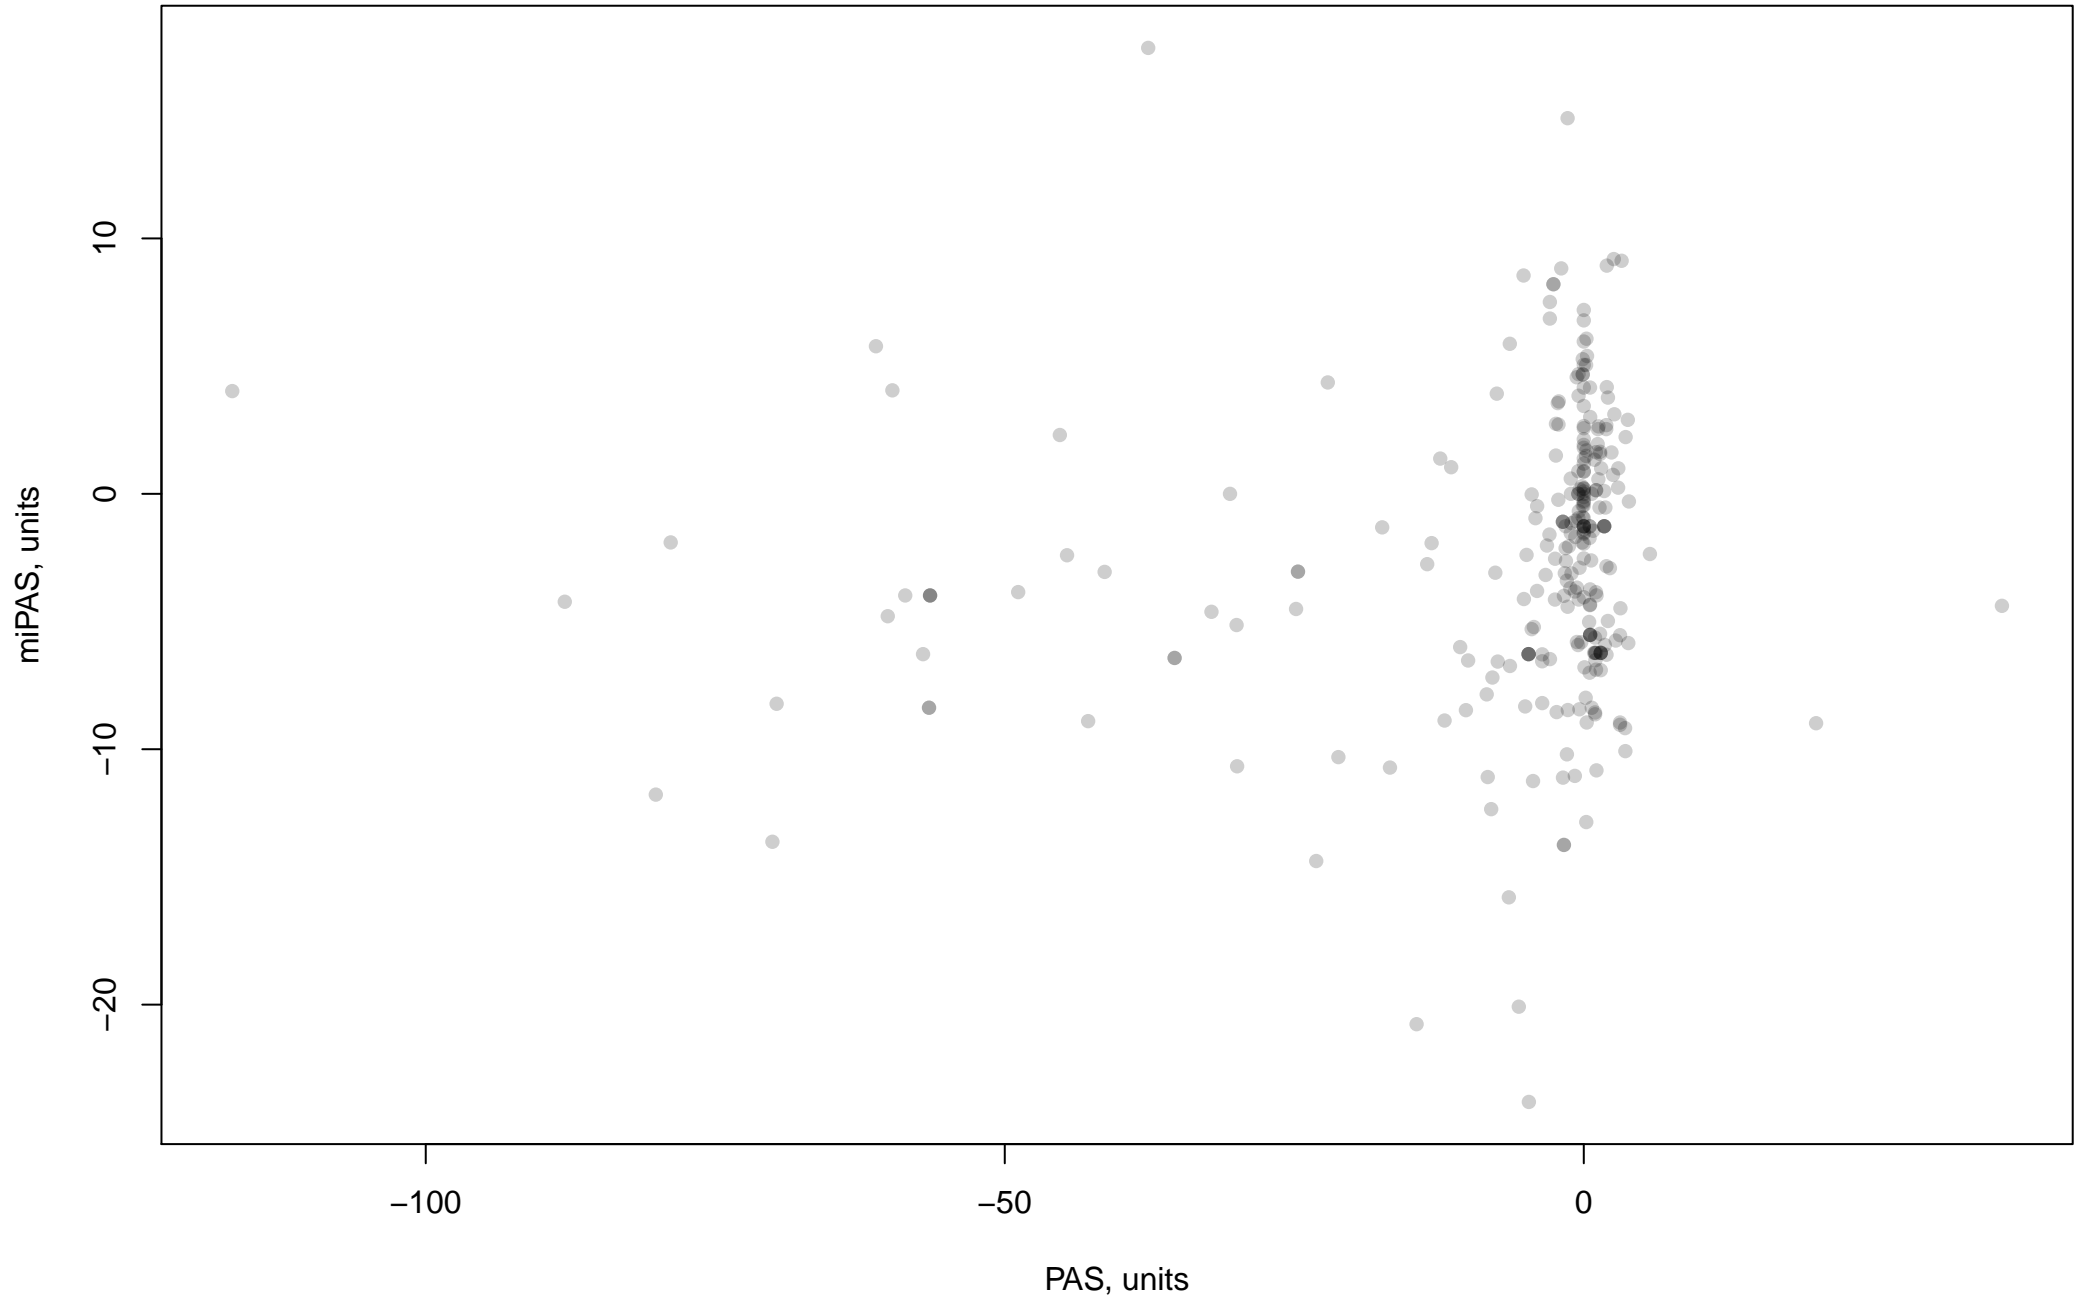

### Sample 4 Diana TarBase

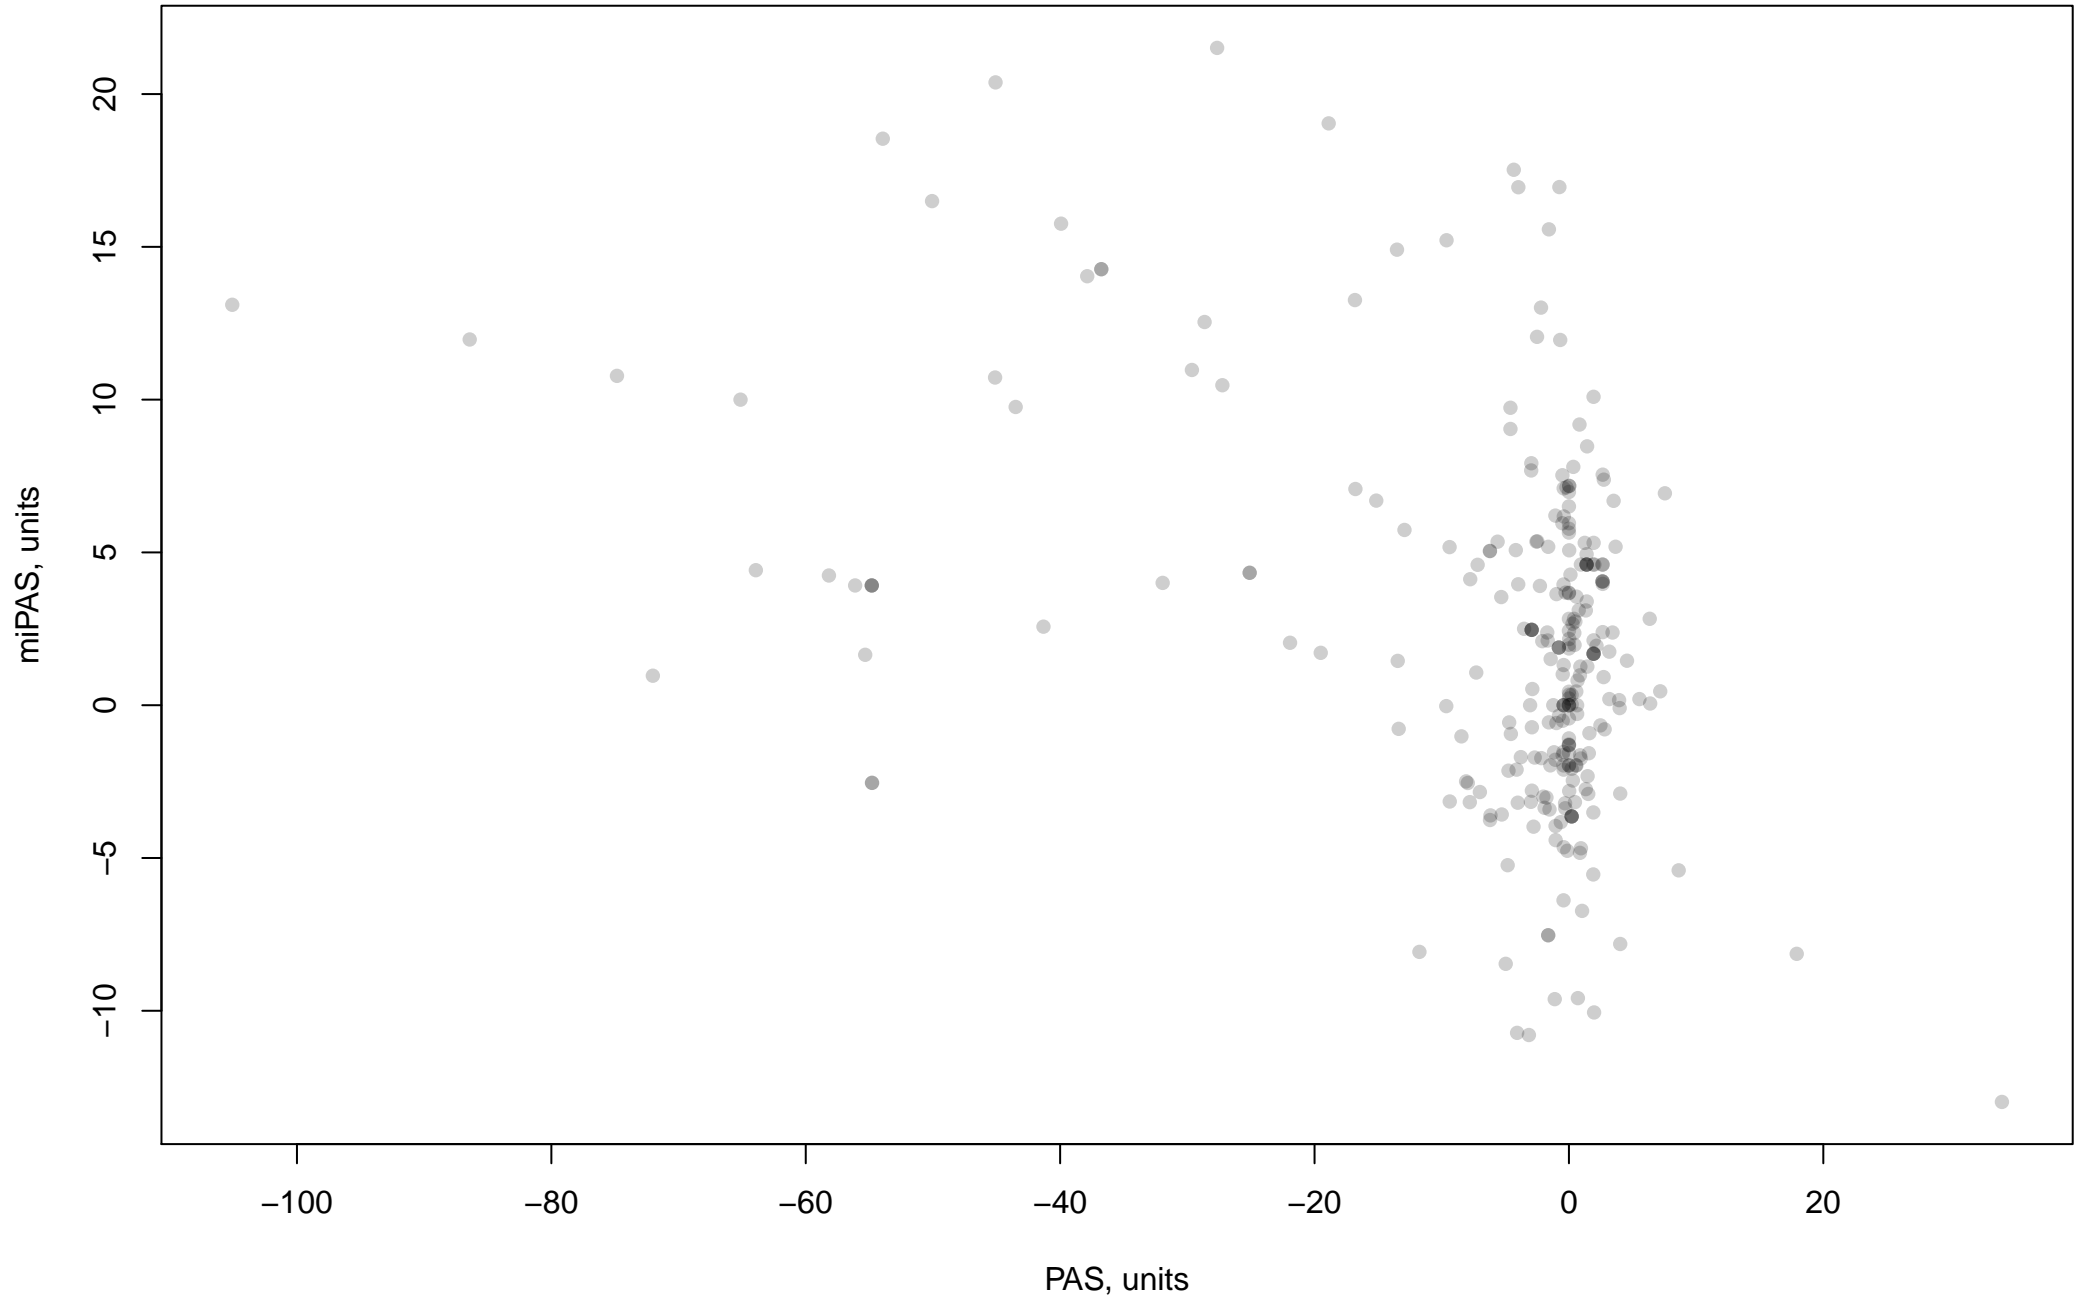

### Sample 5 Diana TarBase

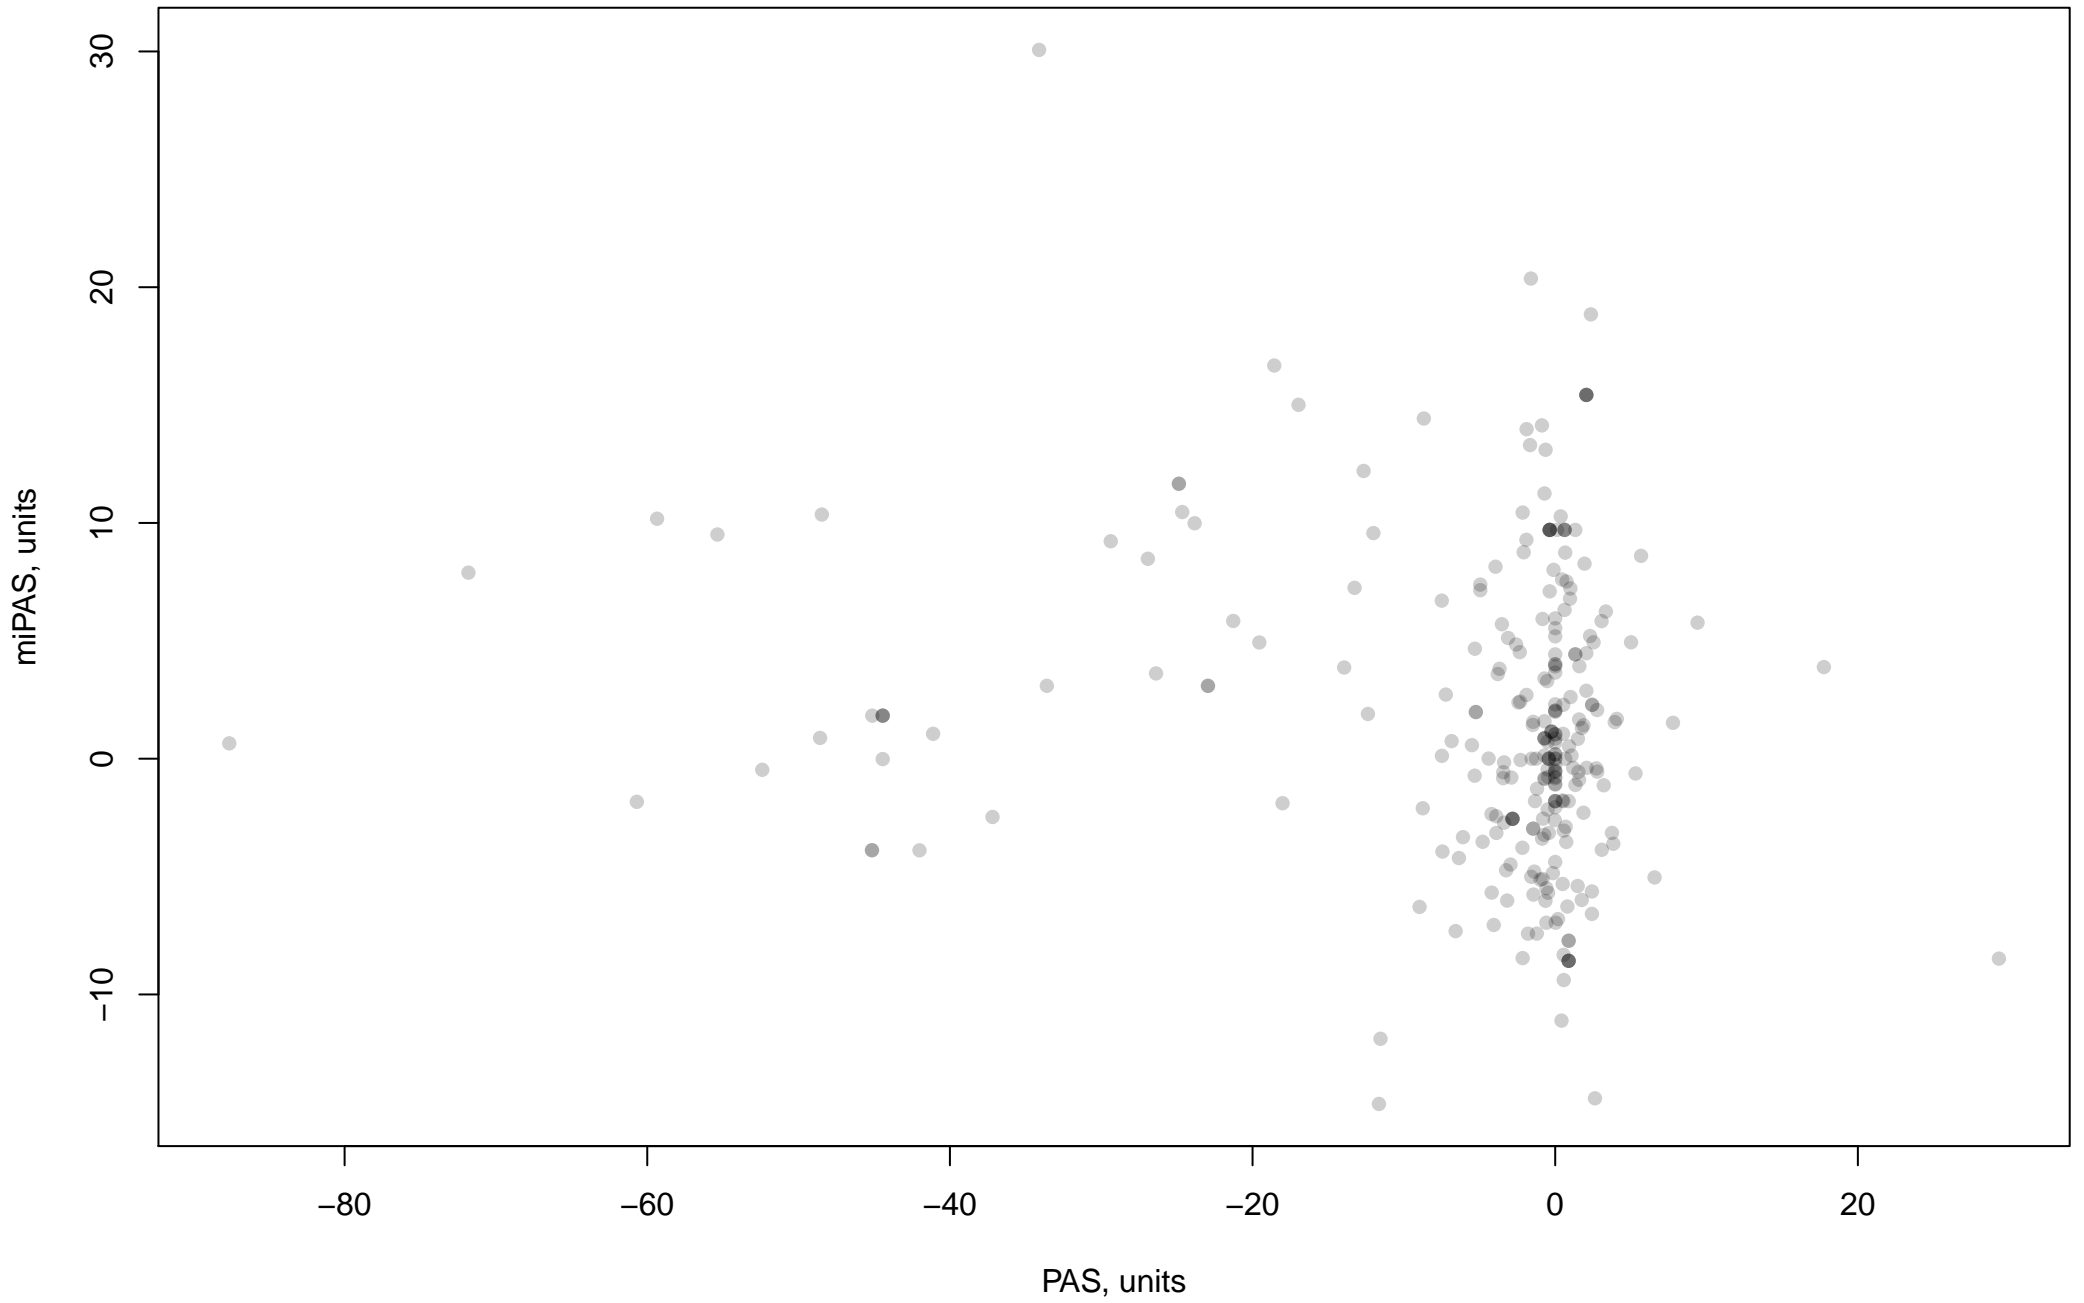

### Sample 6 Diana TarBase

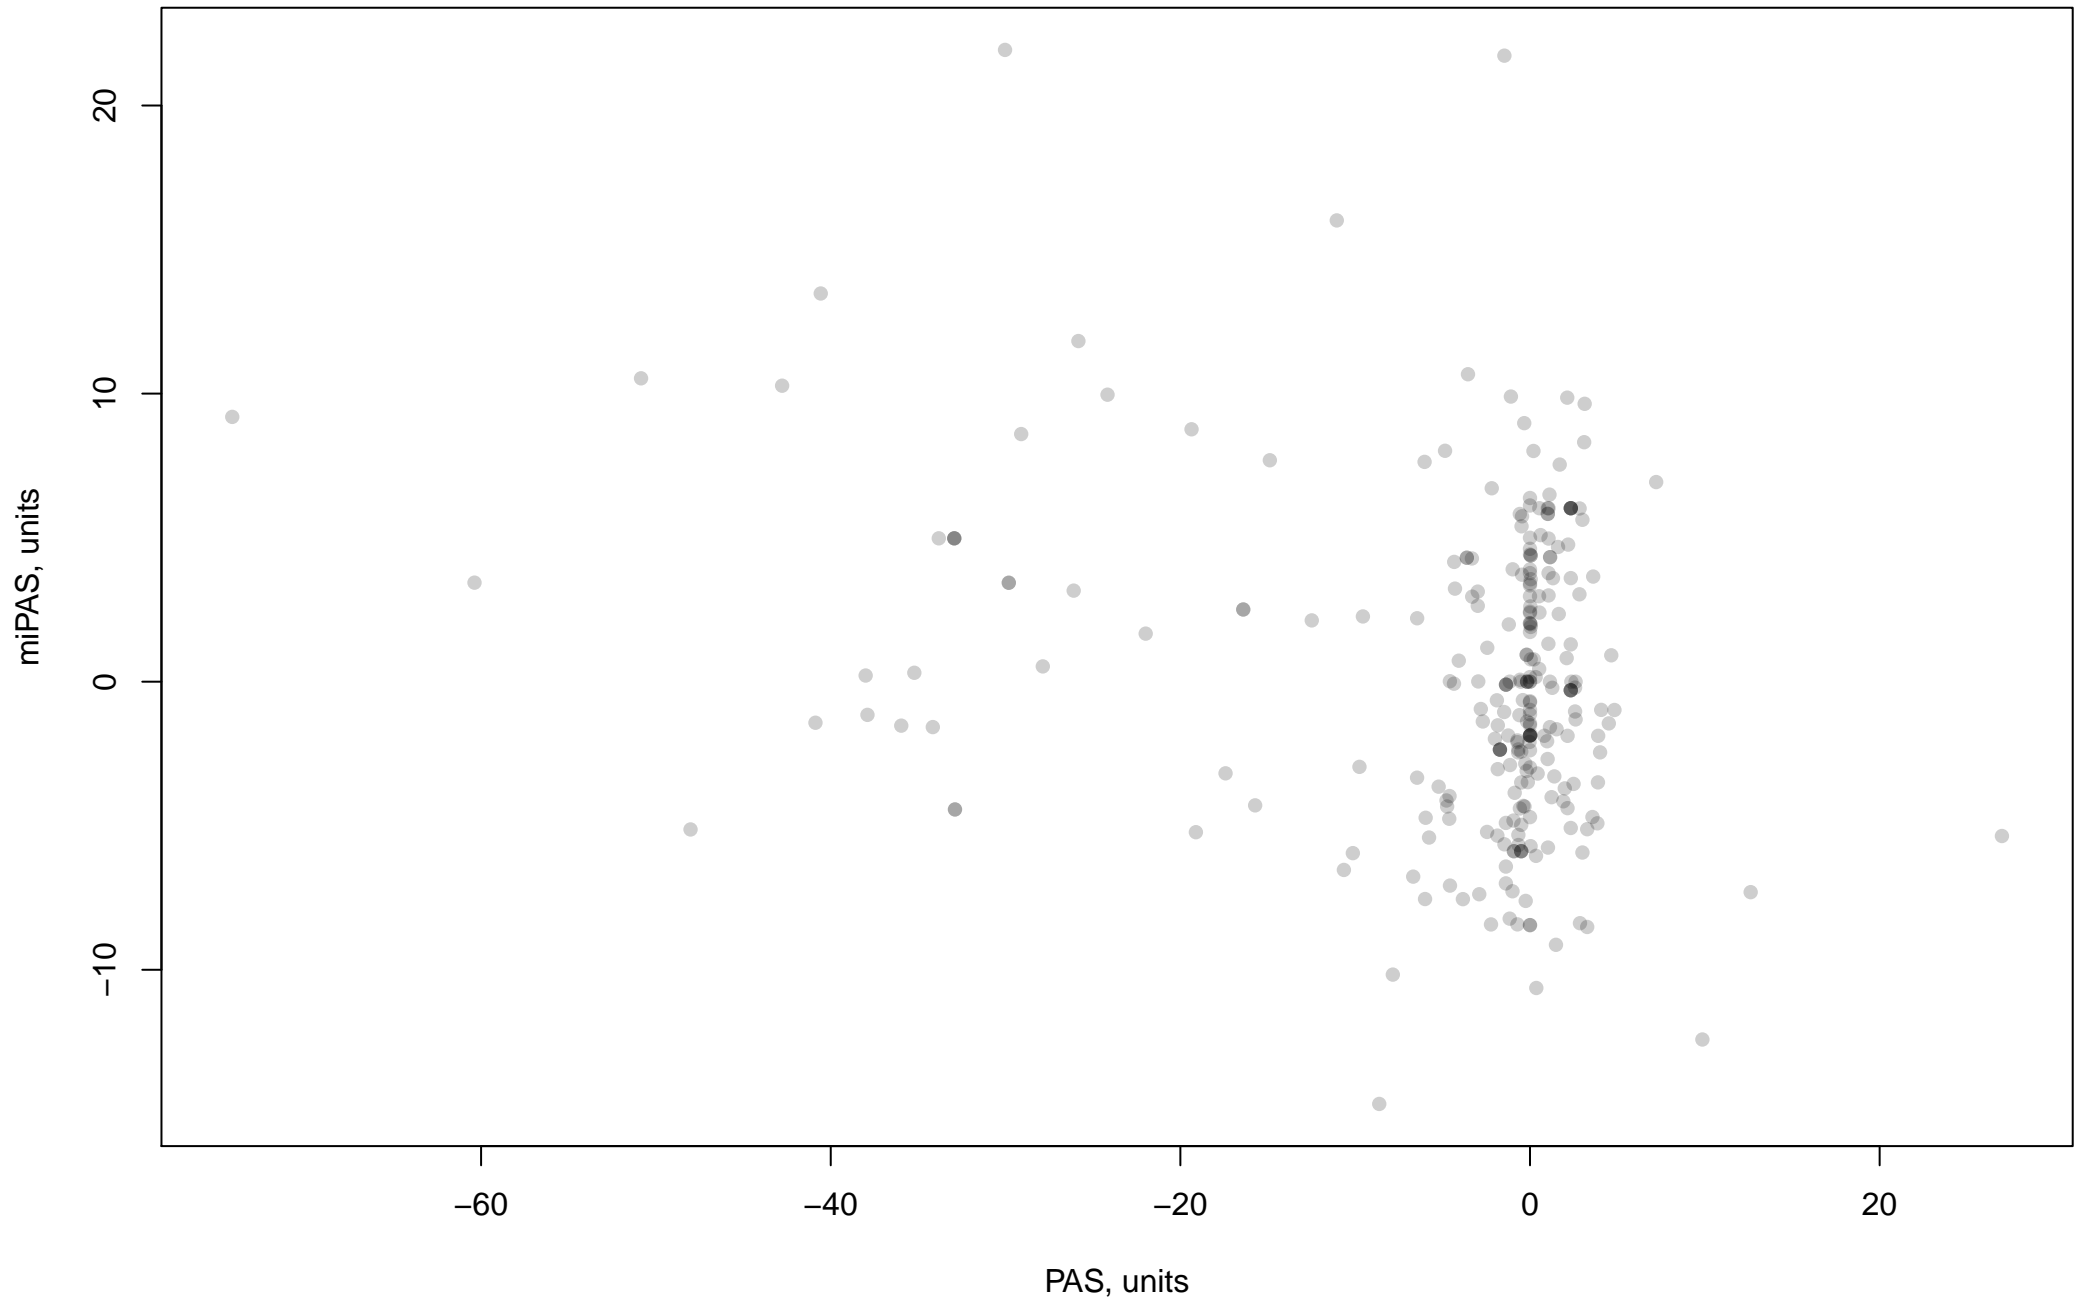

### Sample 7 Diana TarBase

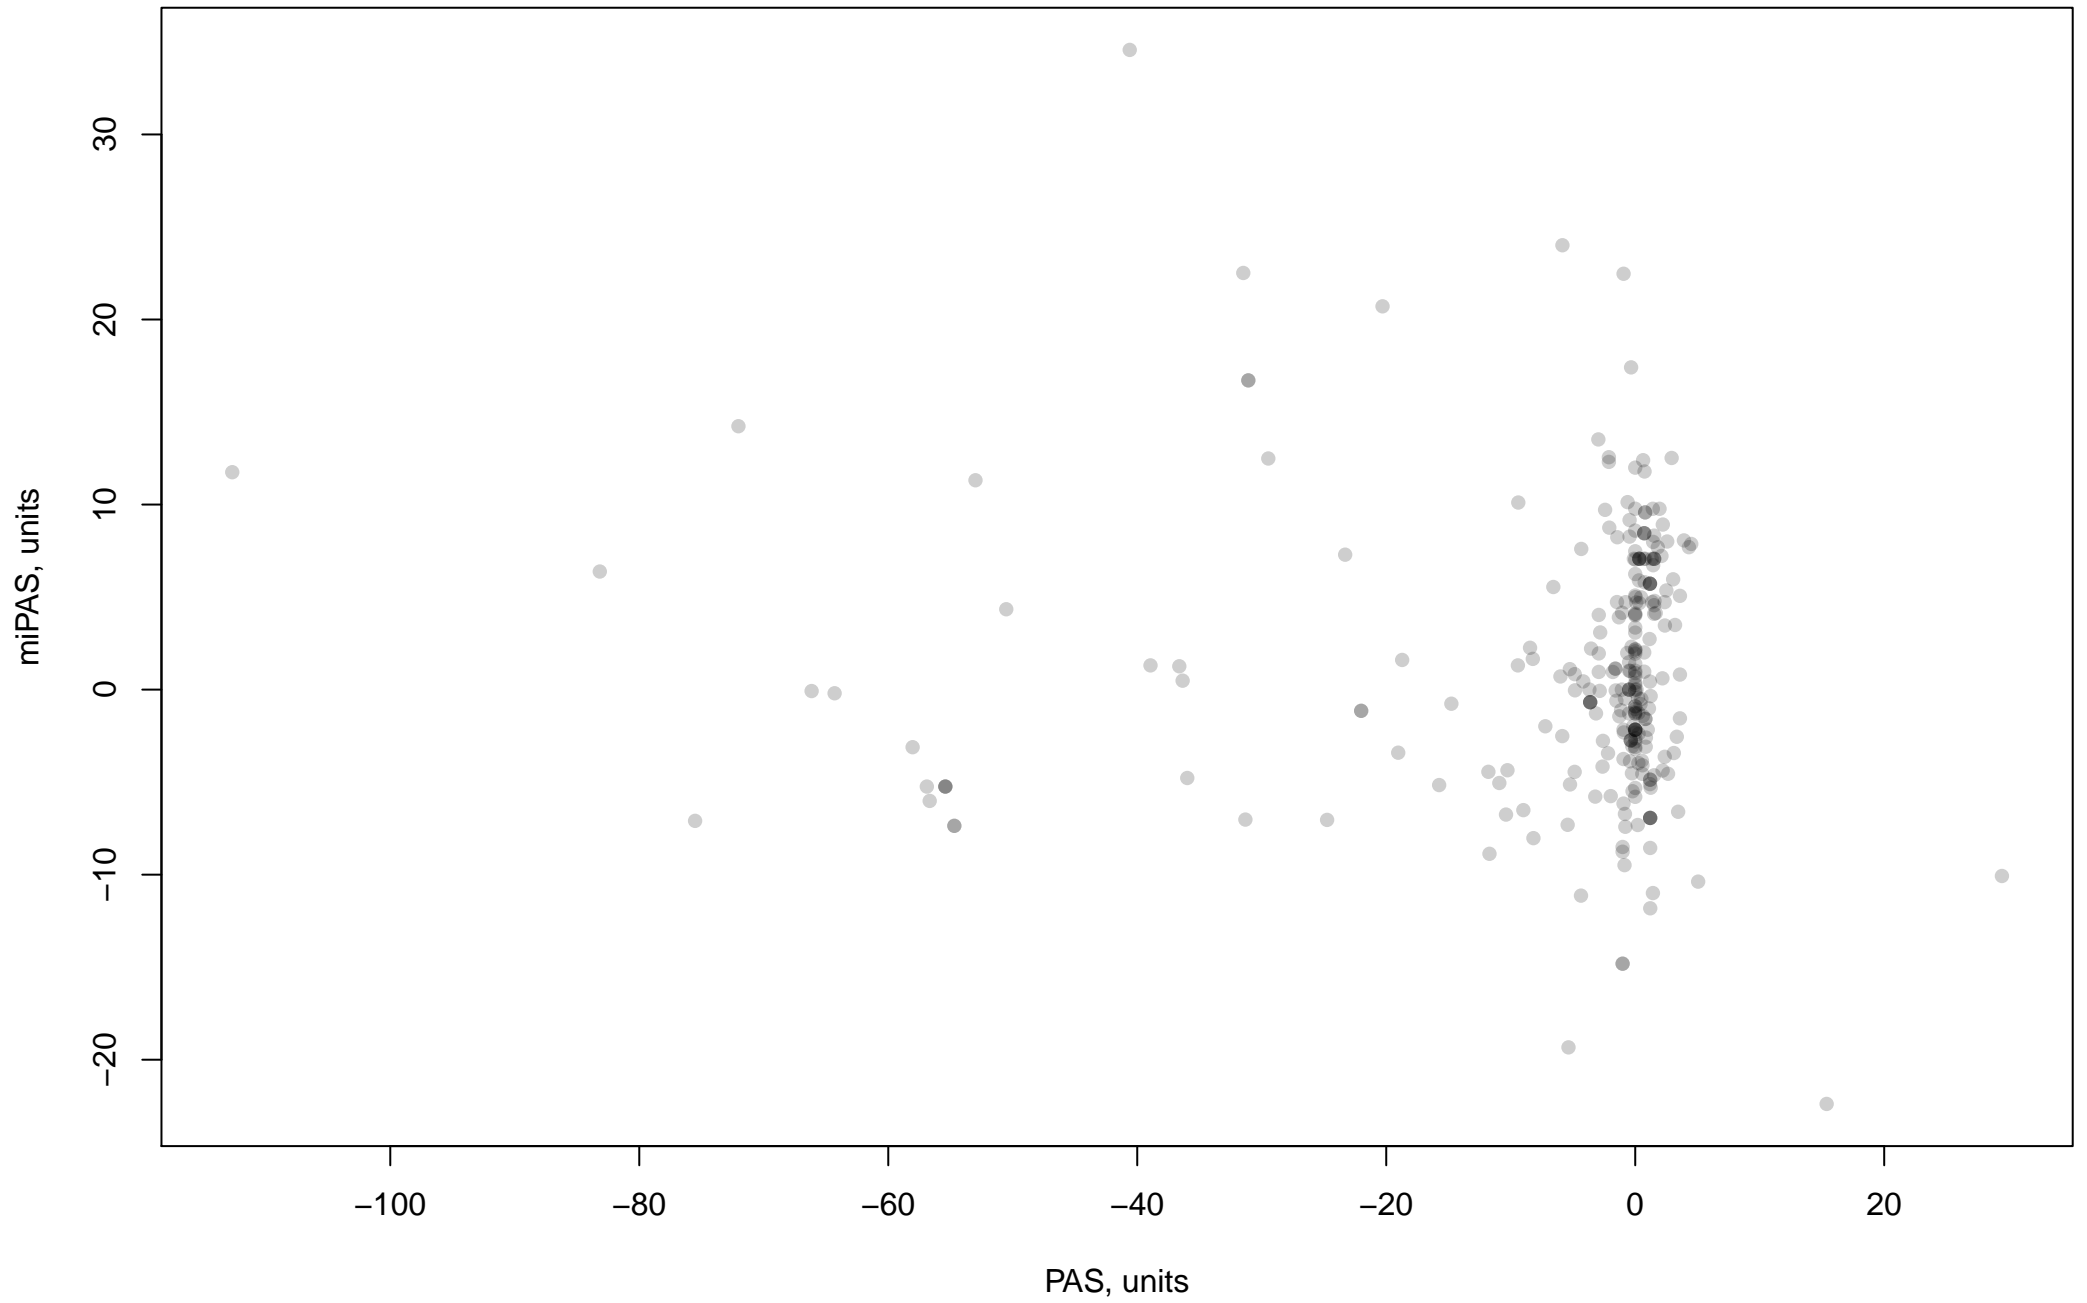

### Sample 8 Diana TarBase

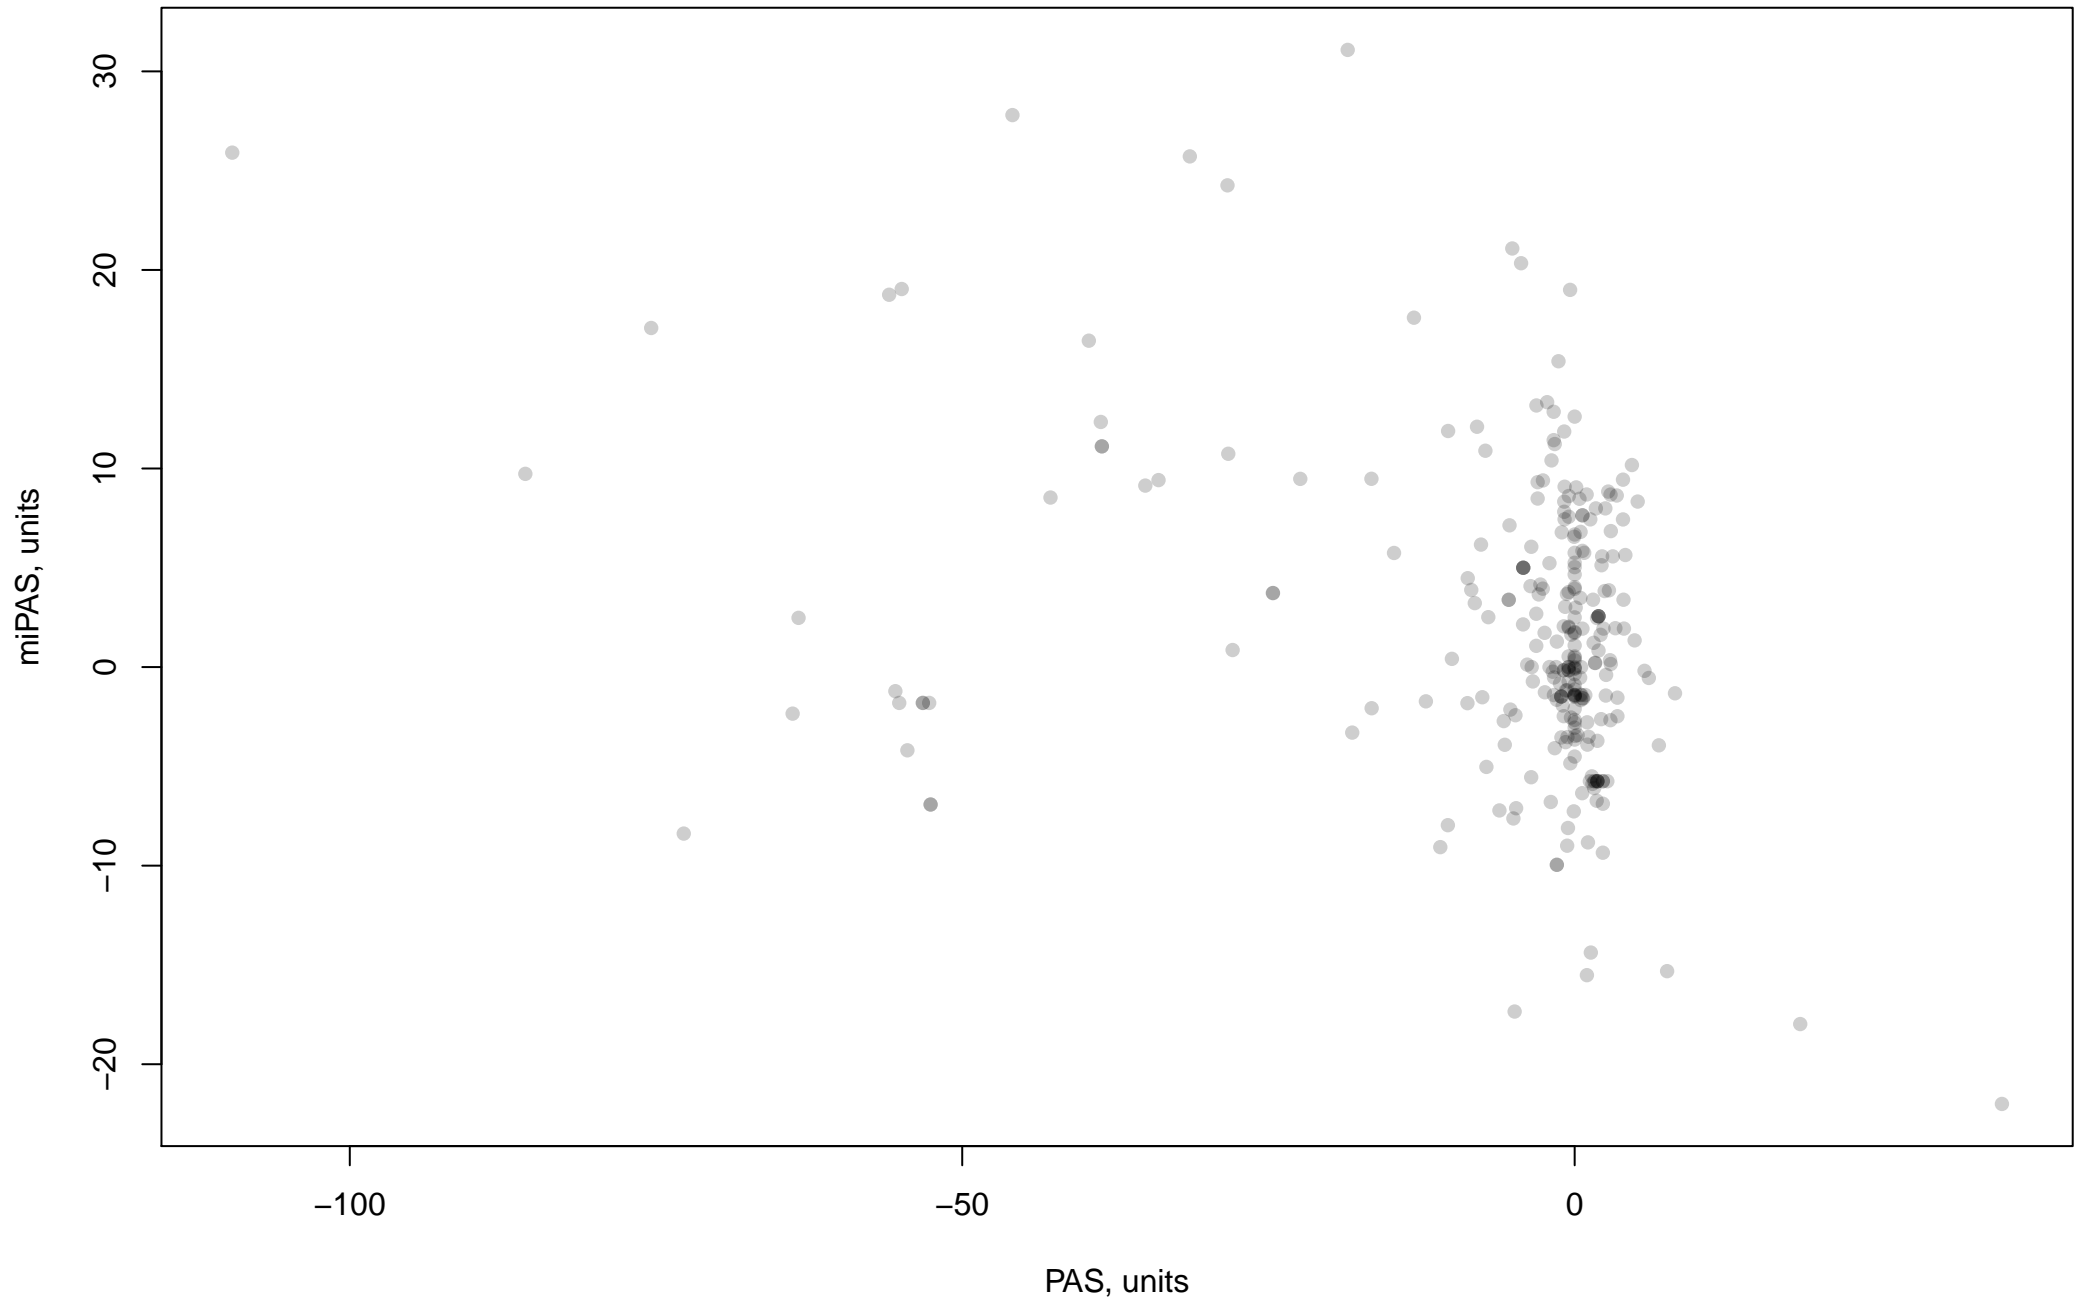



# AVG Sample Diana TarBase

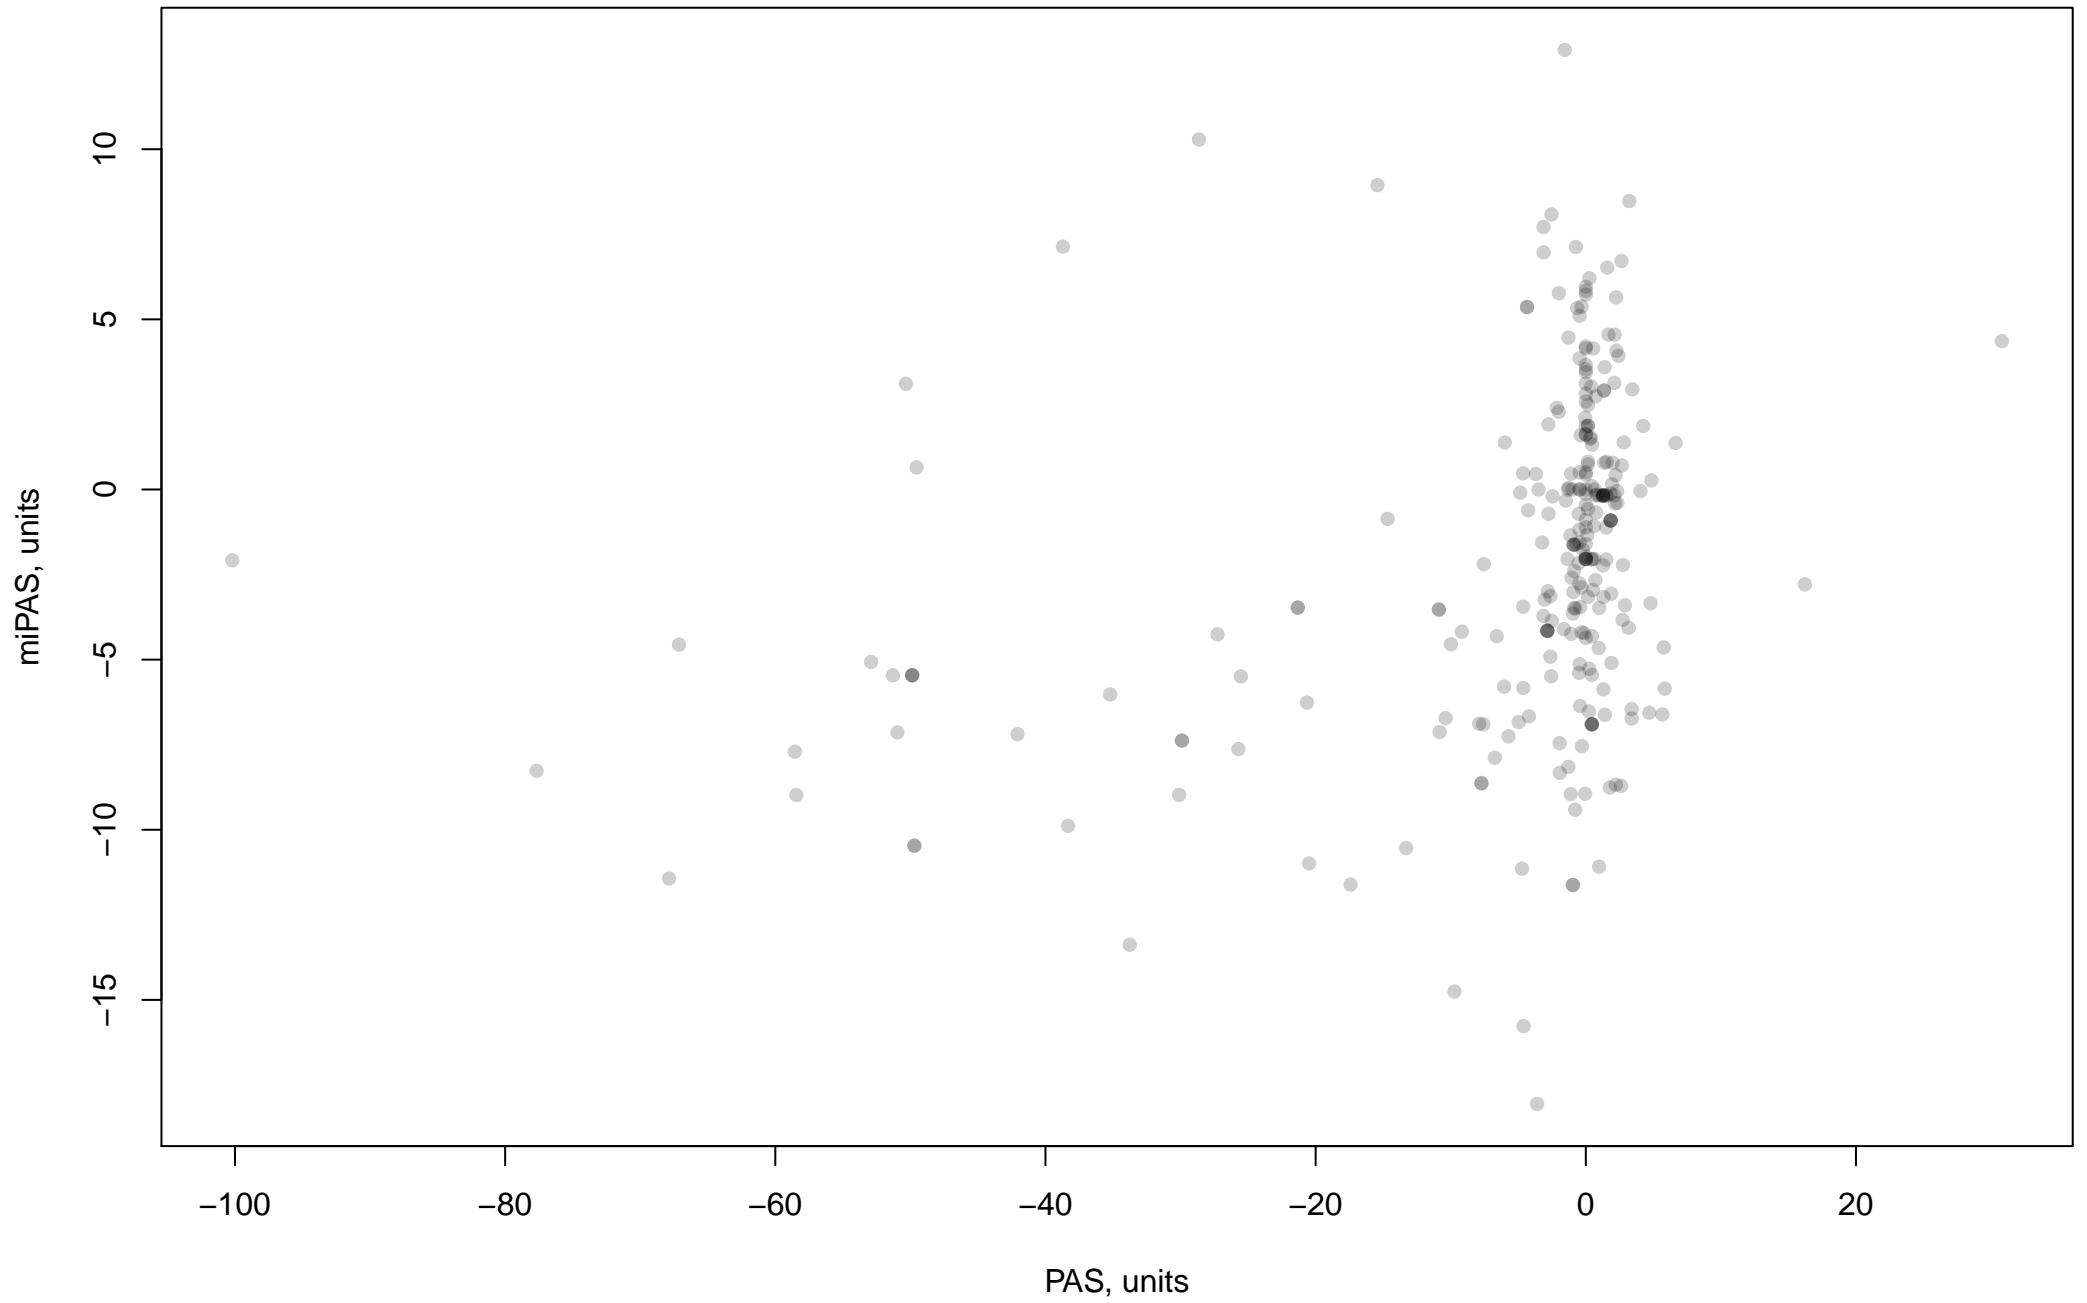

Supplement: kccy-15-05-1147633-s005.pdf [file kccy-15-05-1147633-s005.pdf]
