# Supplementary material for: MiRImpact, a new bioinformatic method using complete microRNA expression profiles to assess their overall influence on the activity of intracellular molecular pathways
Source: PubMed Central journal article supplement — Cell Cycle. 2016 Mar 30;15(5):689–98. doi: 10.1080/15384101.2016.1147633 (PMC4845938; doi:10.1080/15384101.2016.1147633), 2016-03-30

Sample 1 miRTarBase

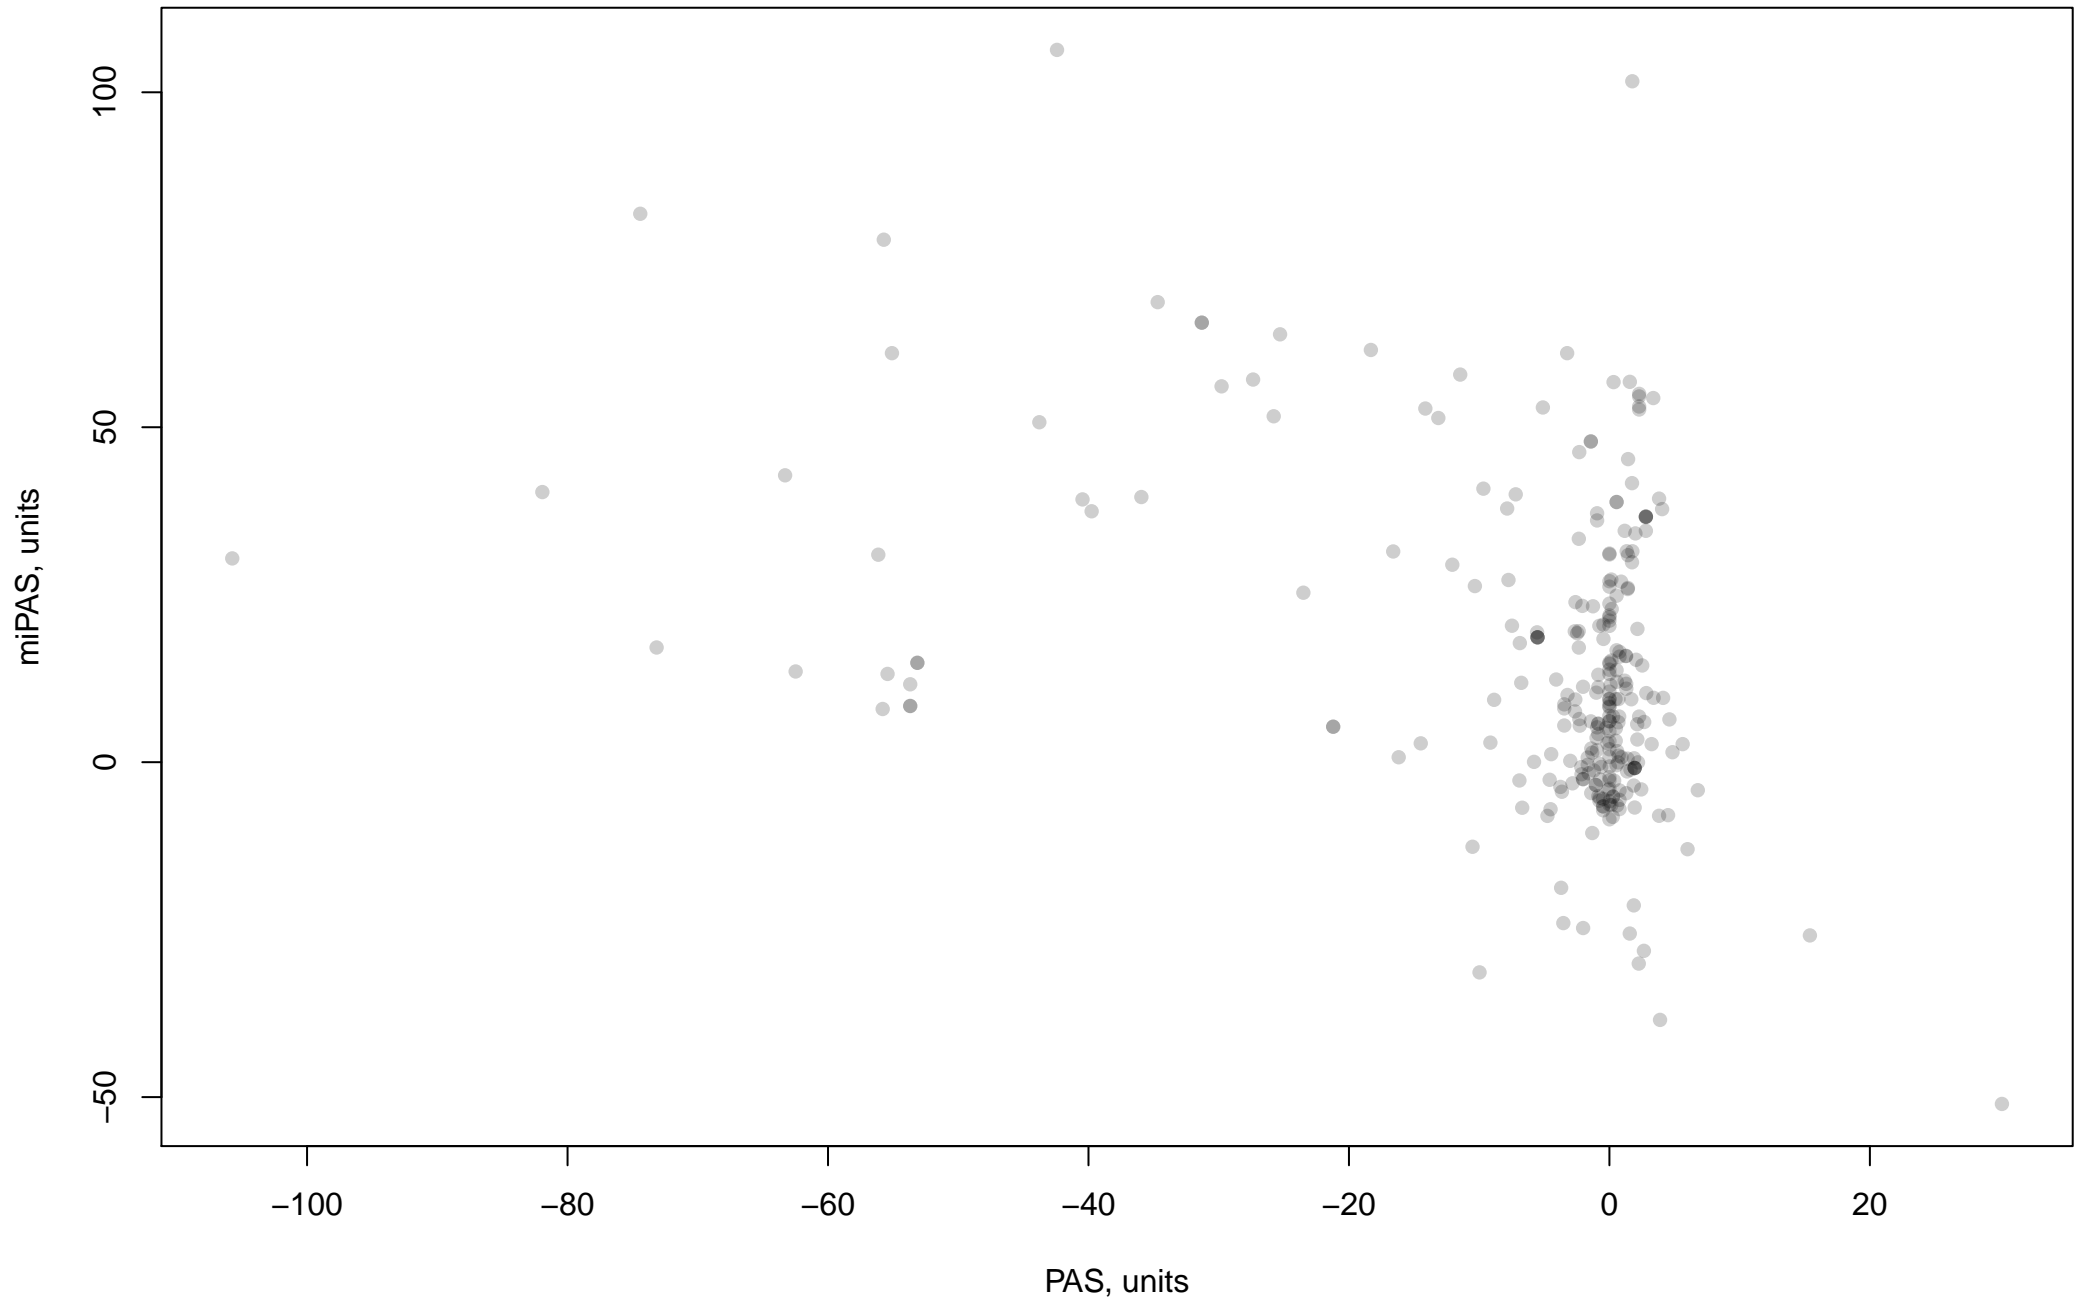

# Sample 2 miRTarBase

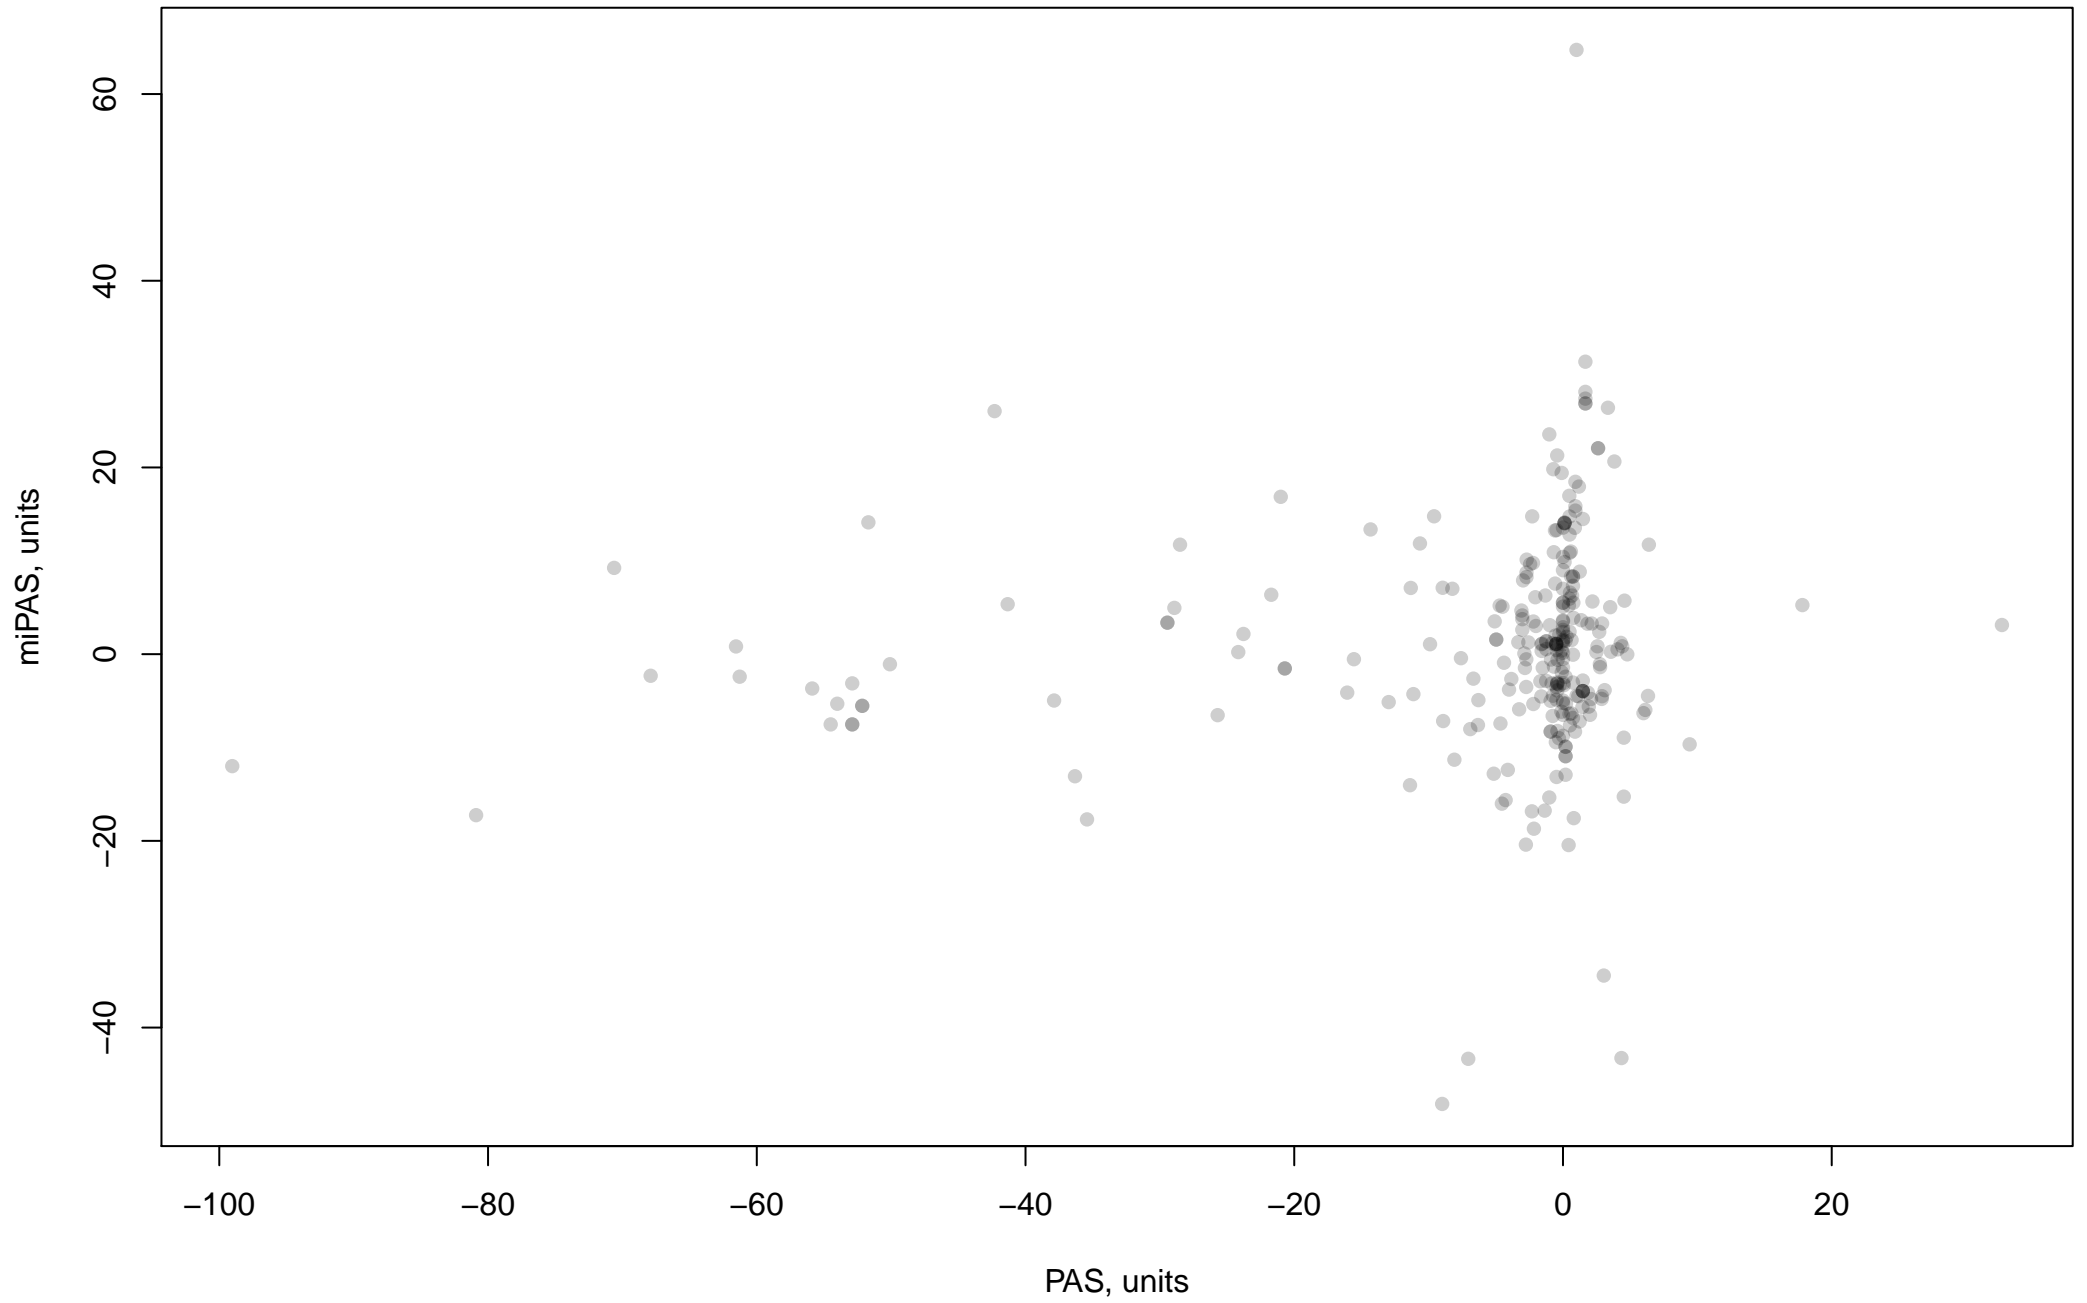

Sample 3 miRTarBase

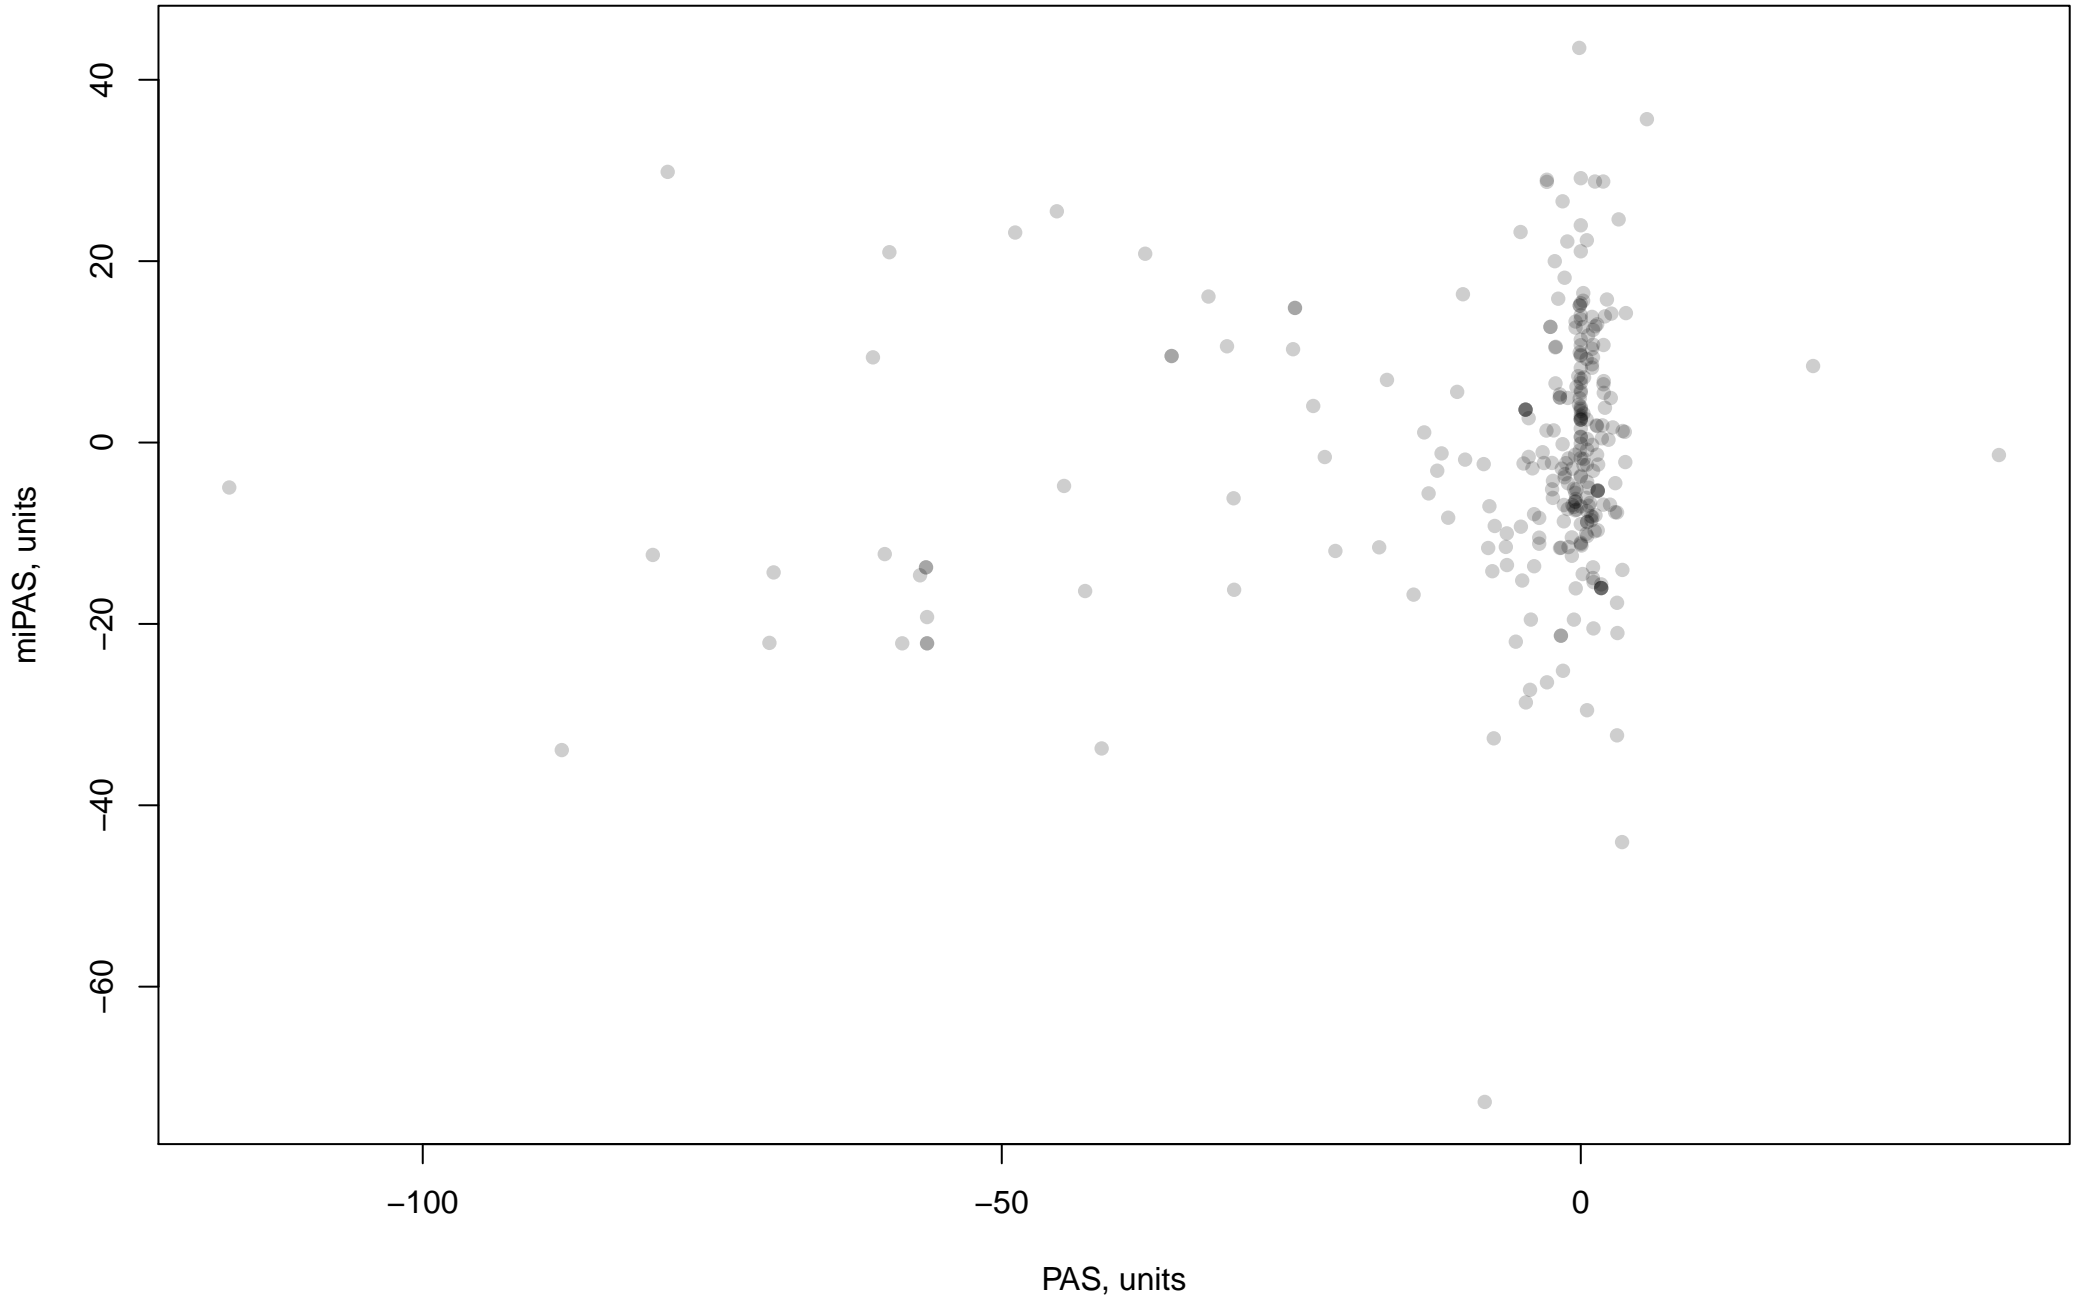

# Sample 4 miRTarBase

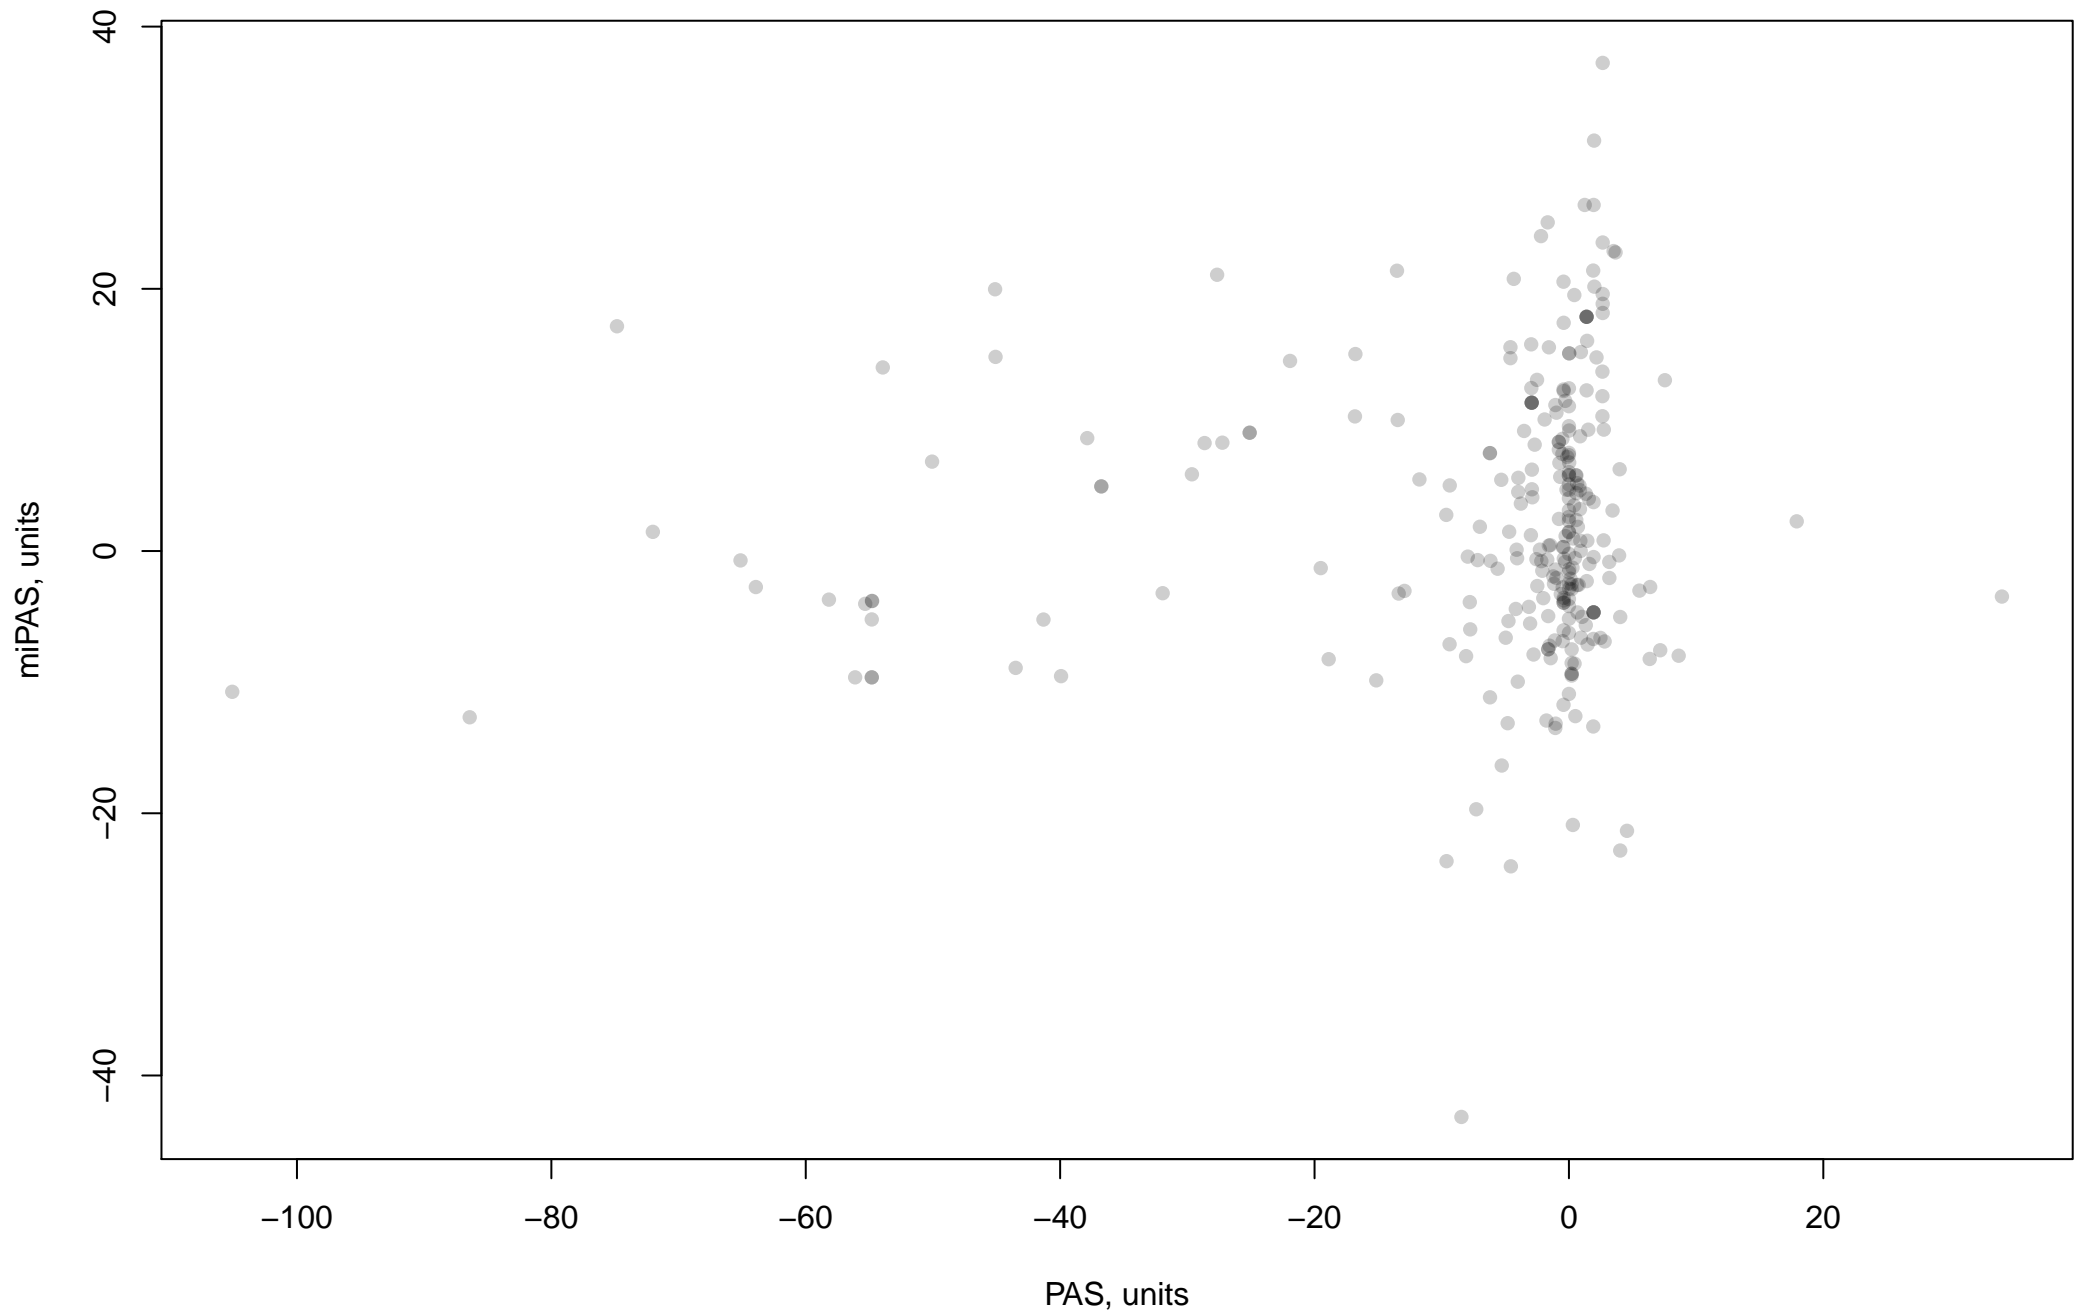

Sample 5 miRTarBase

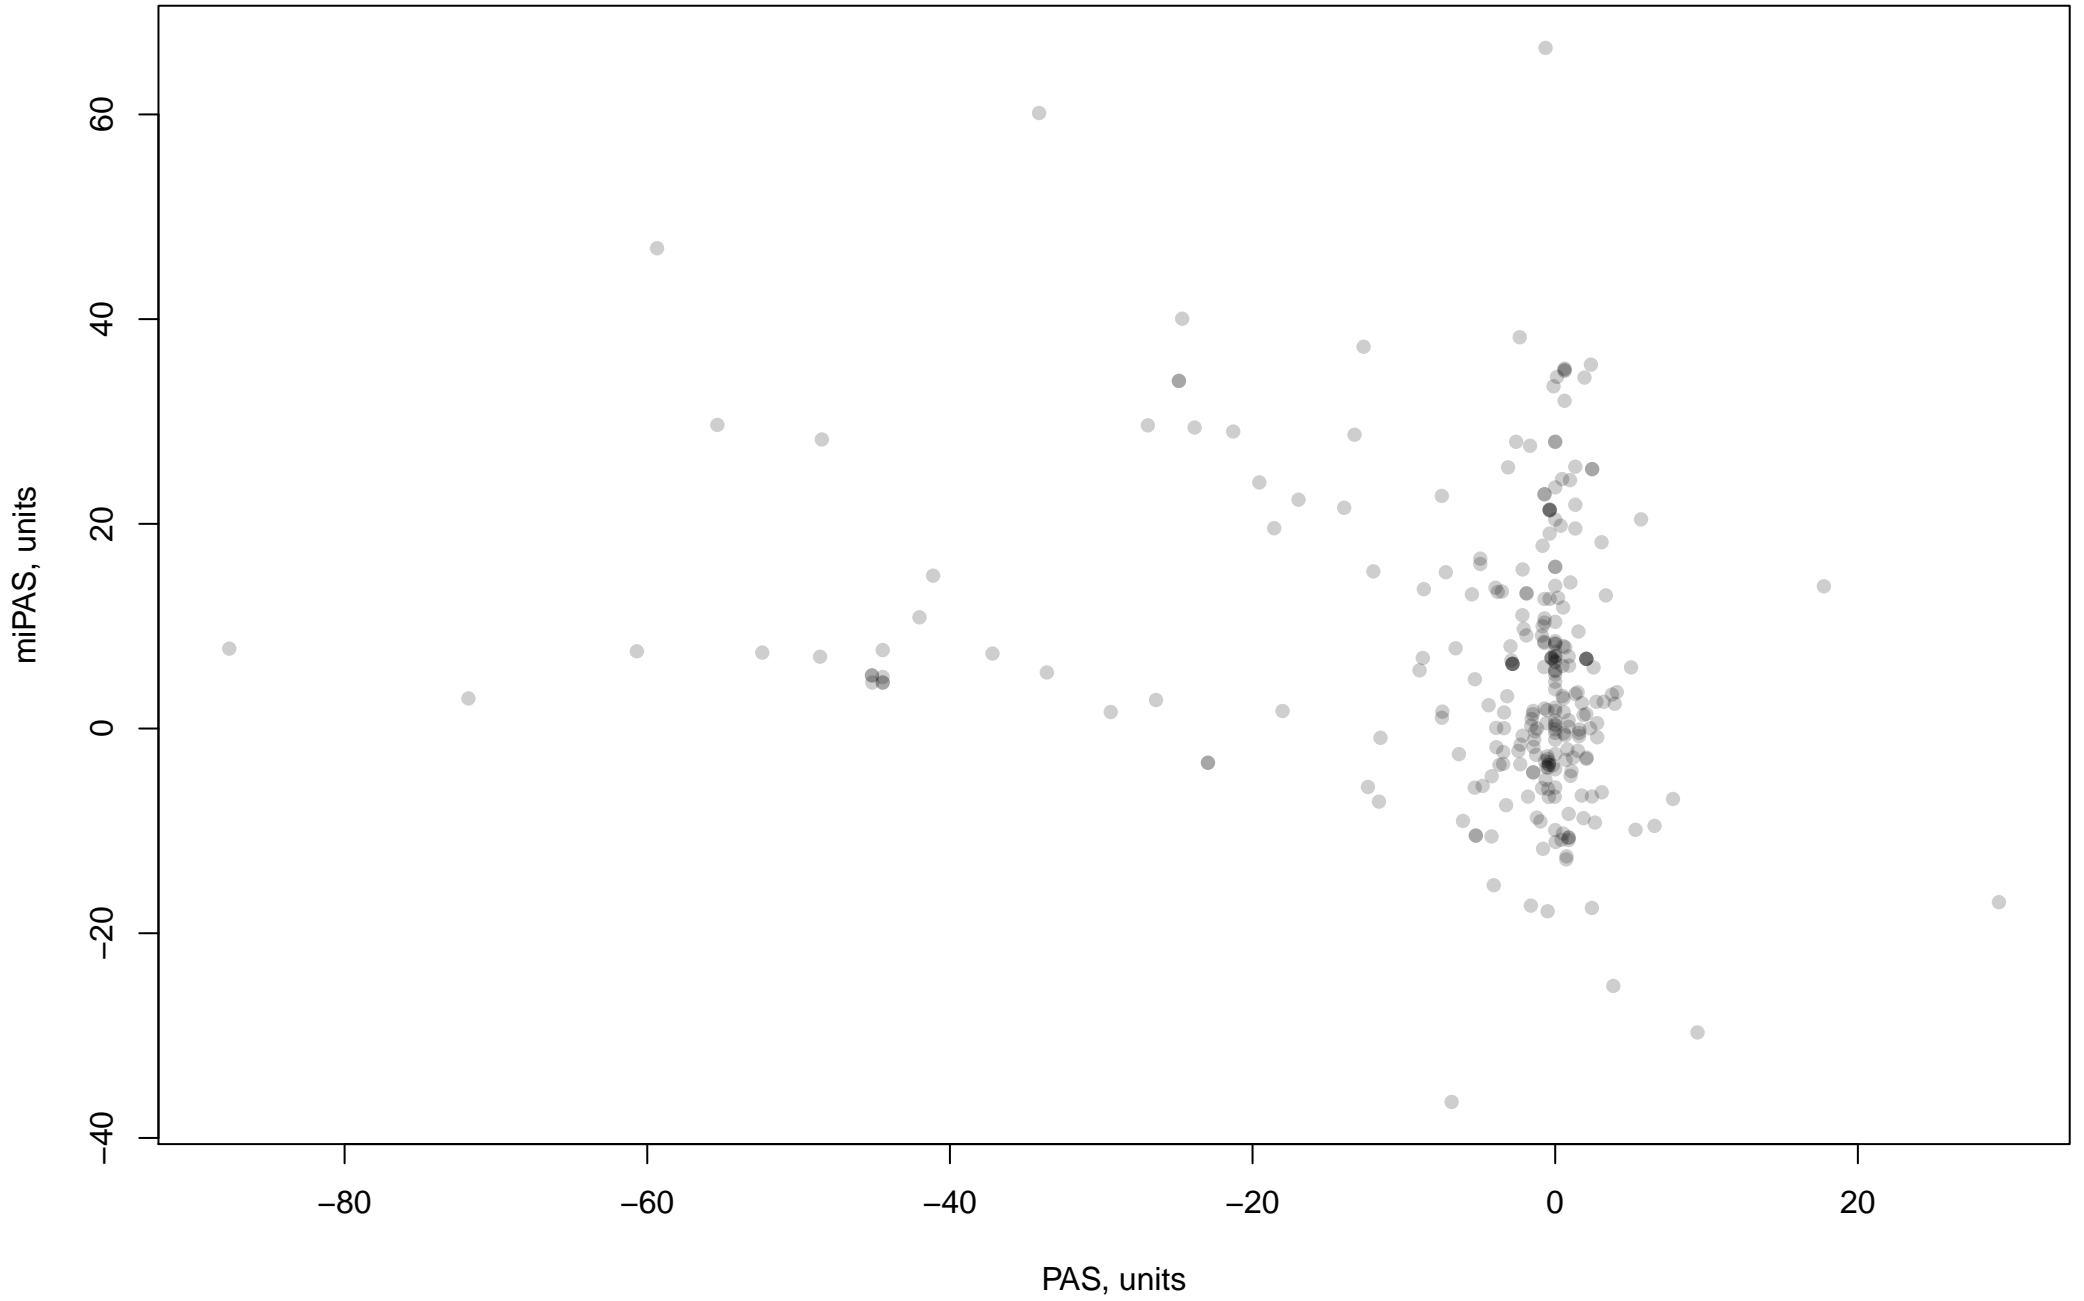

# Sample 6 miRTarBase

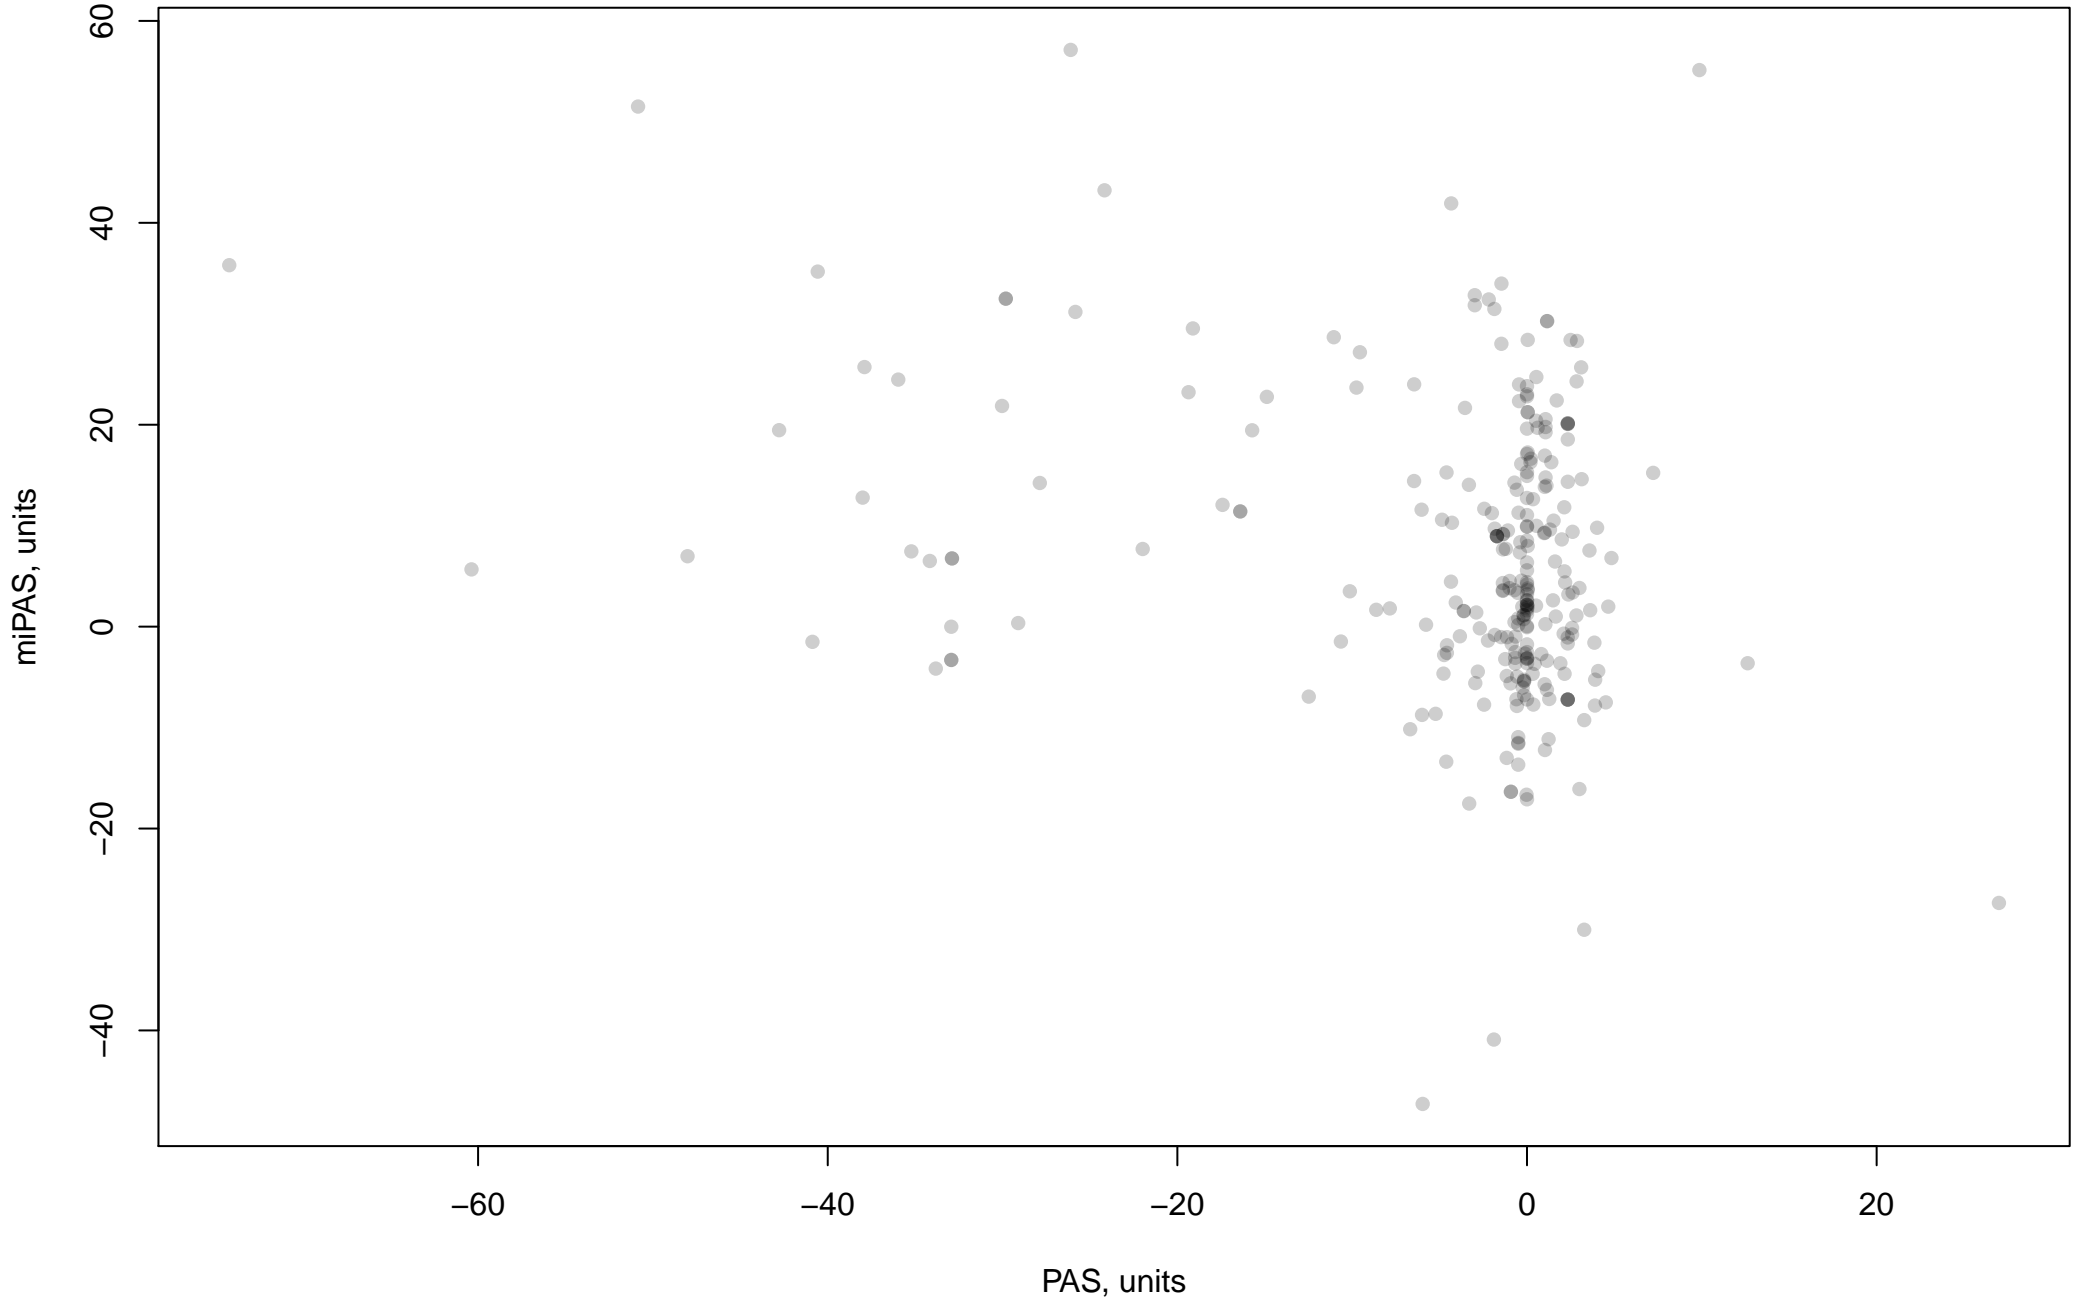

# Sample 7 miRTarBase

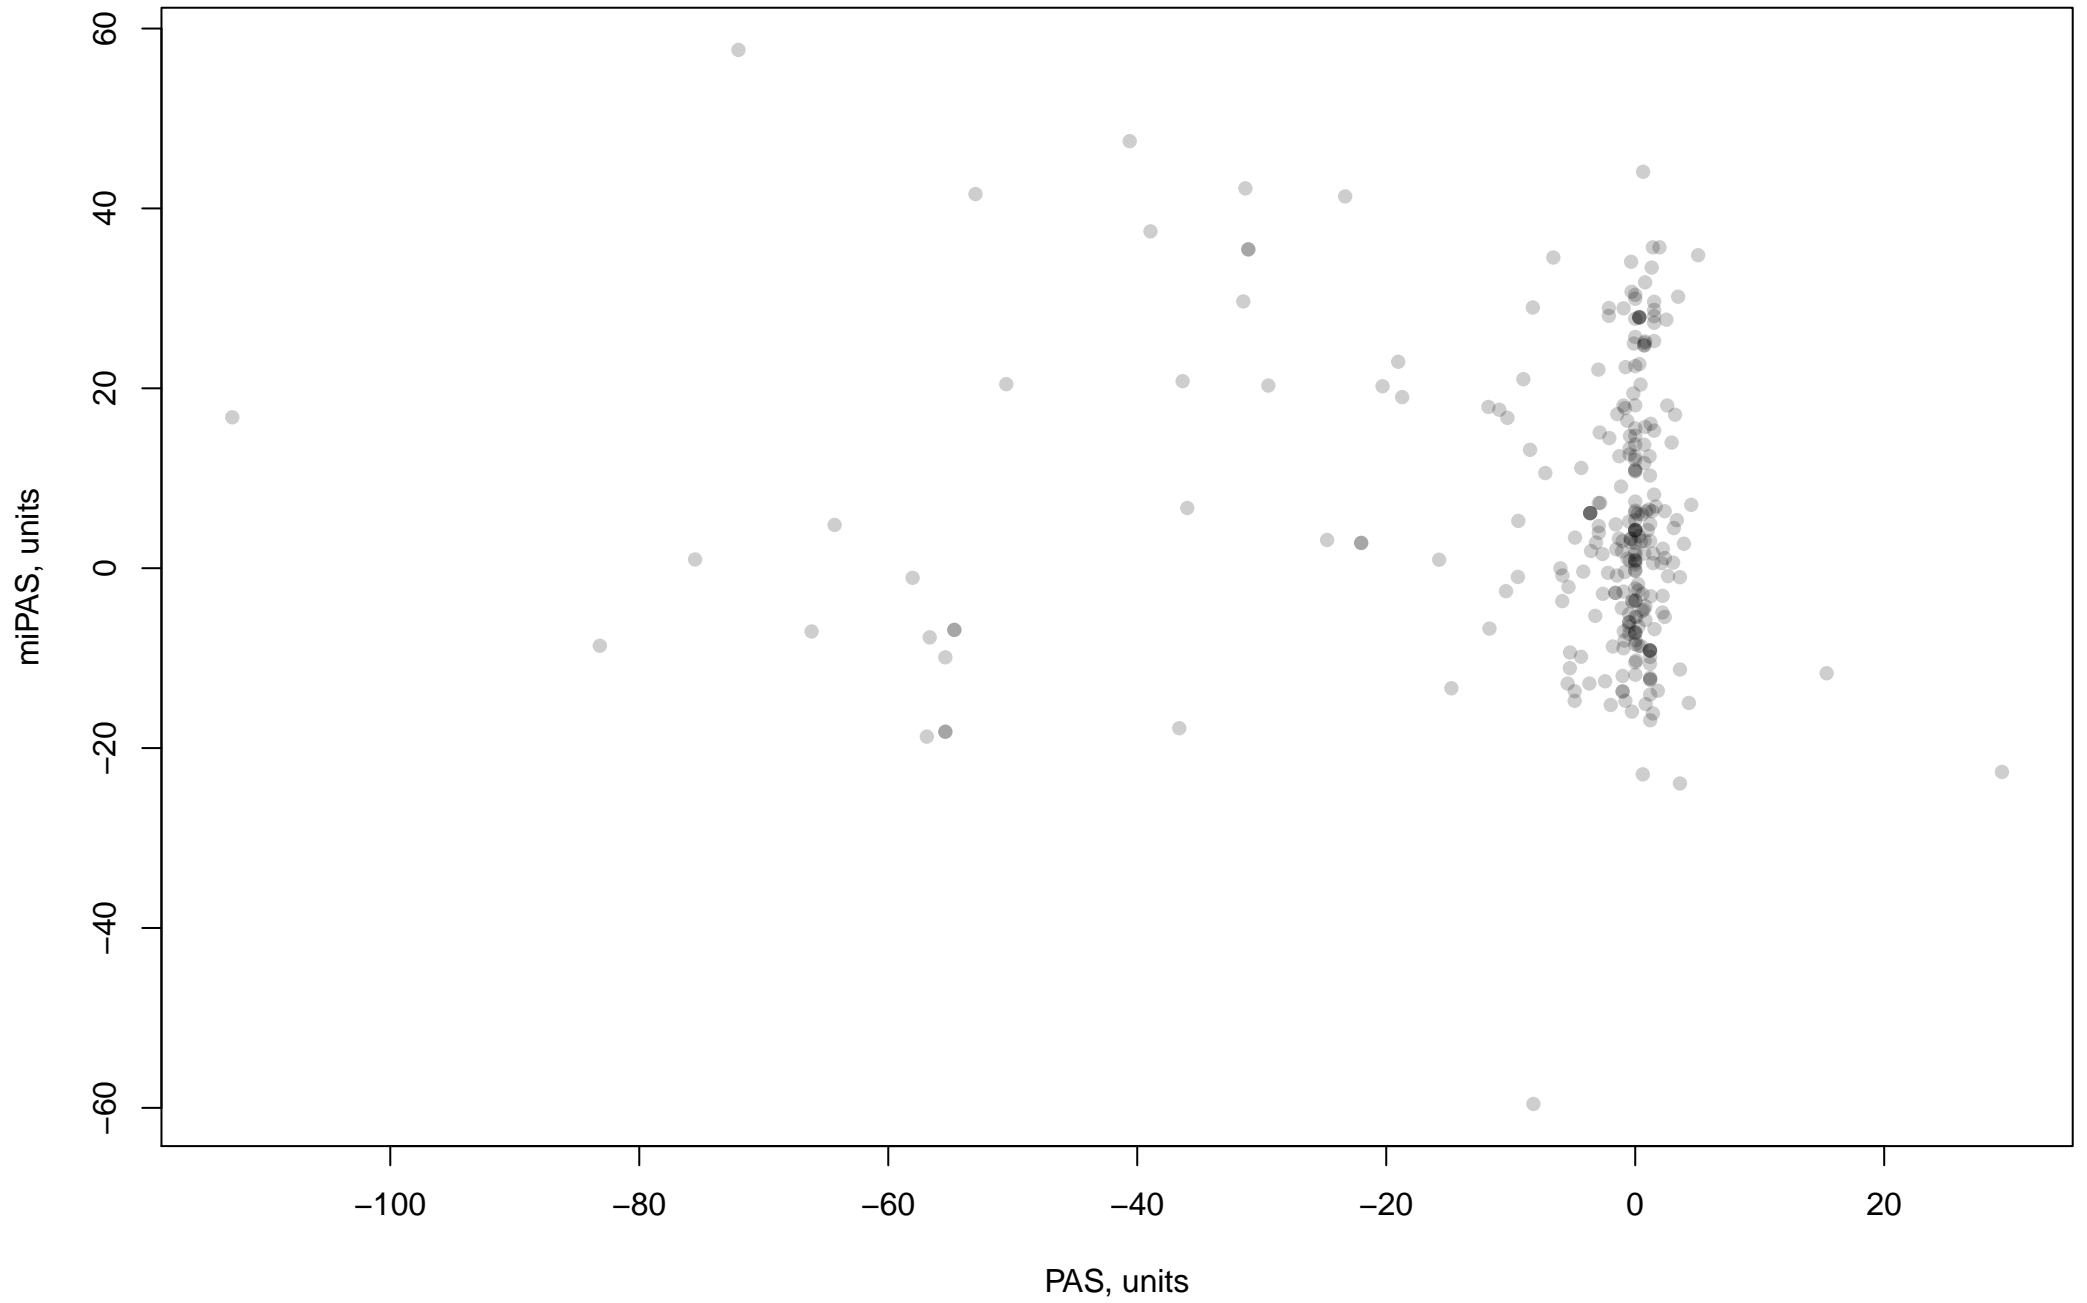

Sample 8 miRTarBase

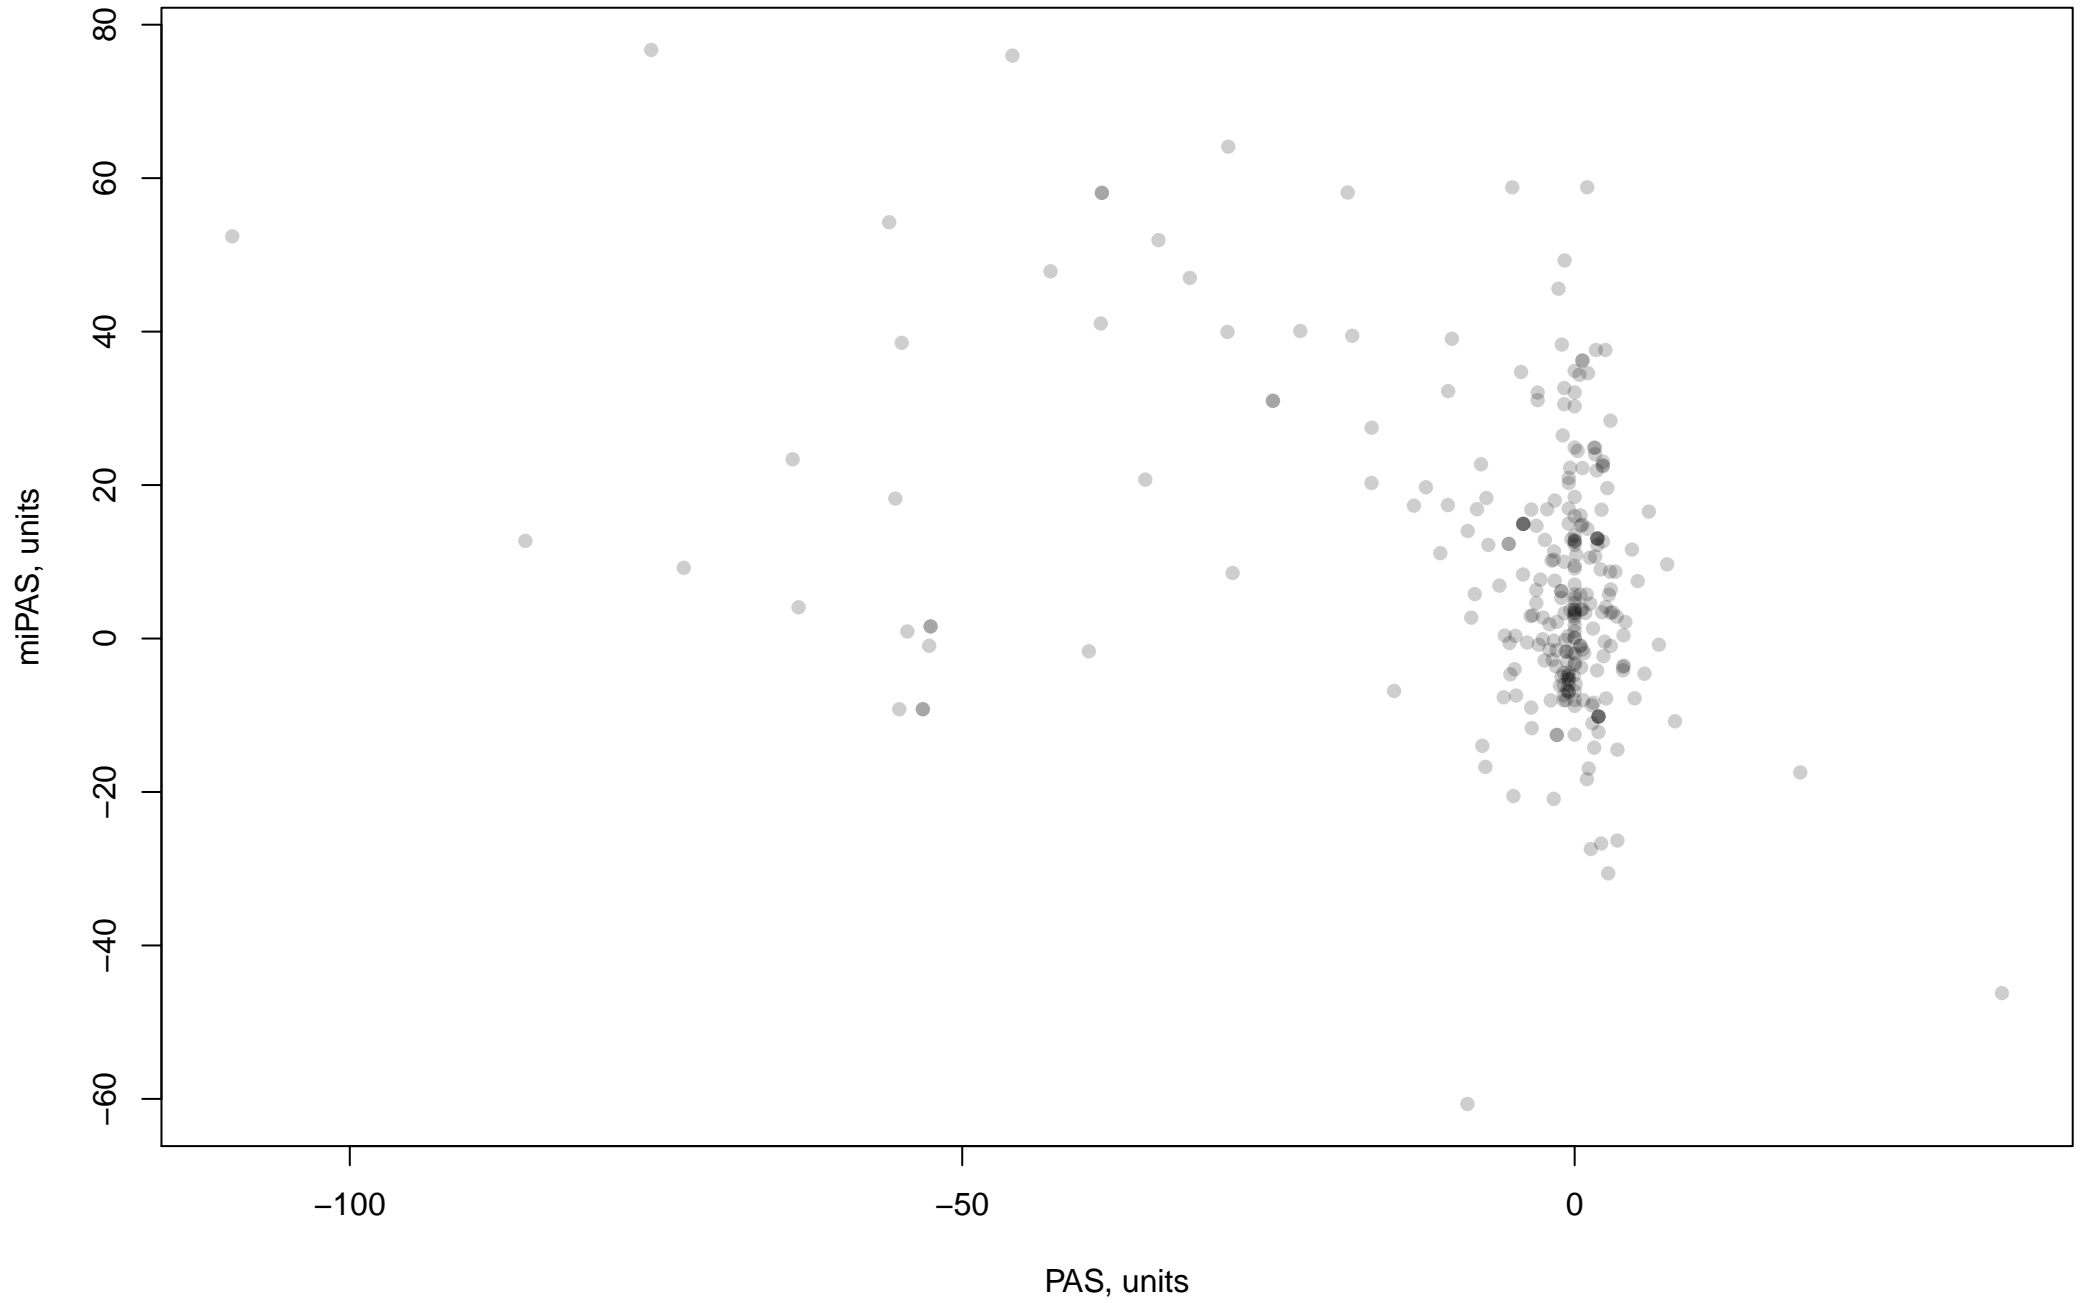



### AVG Sample miRTarBase

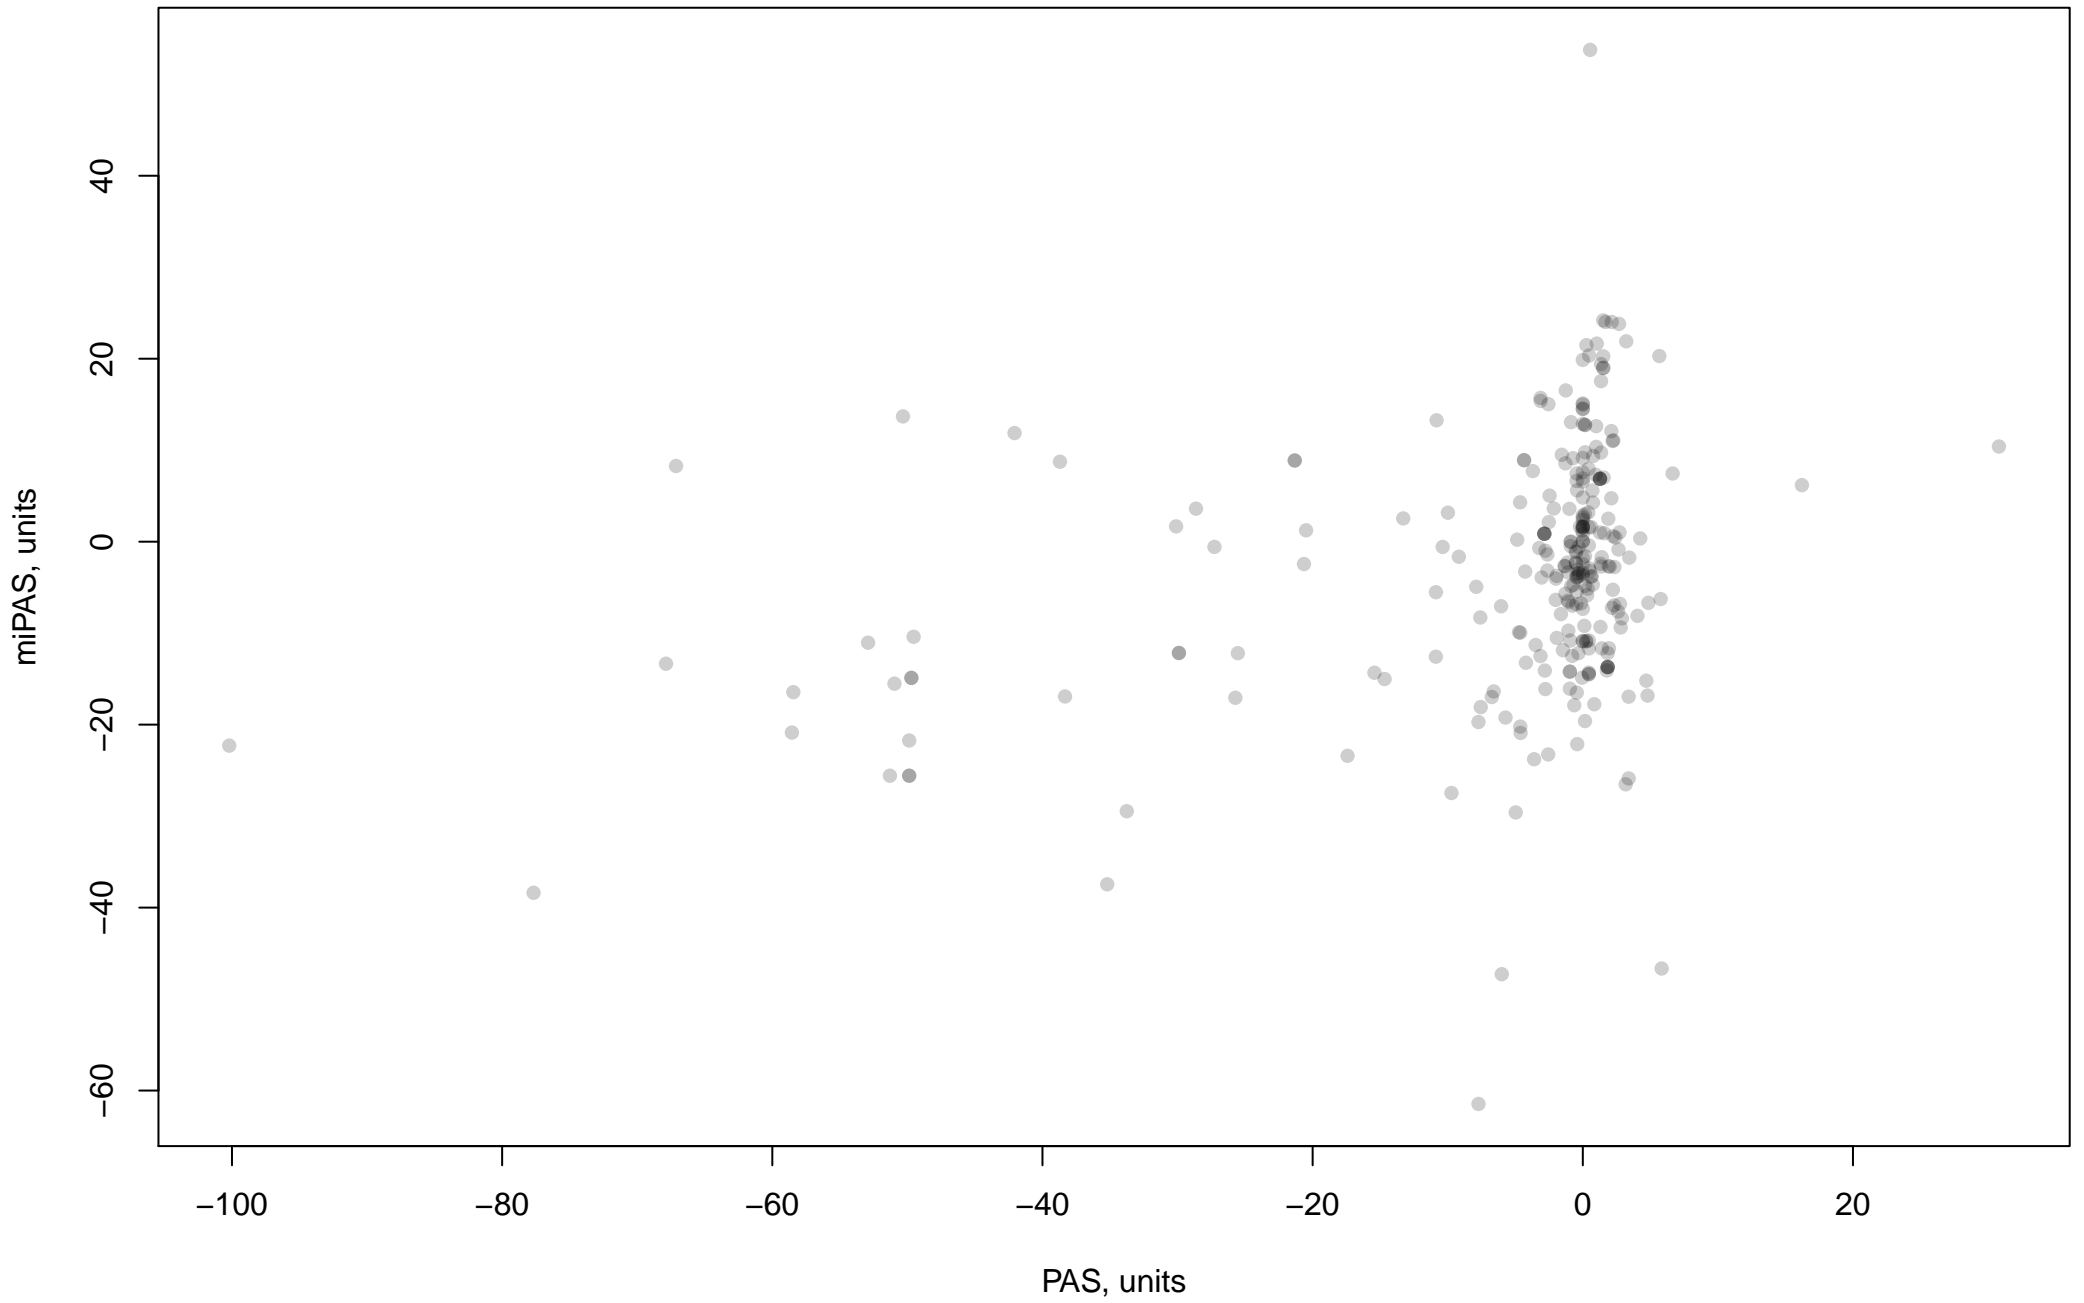

Supplement: kccy-15-05-1147633-s006.pdf [file kccy-15-05-1147633-s006.pdf]
