# Supplementary figures and images for: MiRImpact, a new bioinformatic method using complete microRNA expression profiles to assess their overall influence on the activity of intracellular molecular pathways
Source: PubMed Central journal article supplement — Cell Cycle. 2016 Mar 30;15(5):689–98. doi: 10.1080/15384101.2016.1147633 (PMC4845938; doi:10.1080/15384101.2016.1147633), 2016-03-30

# Sample 1

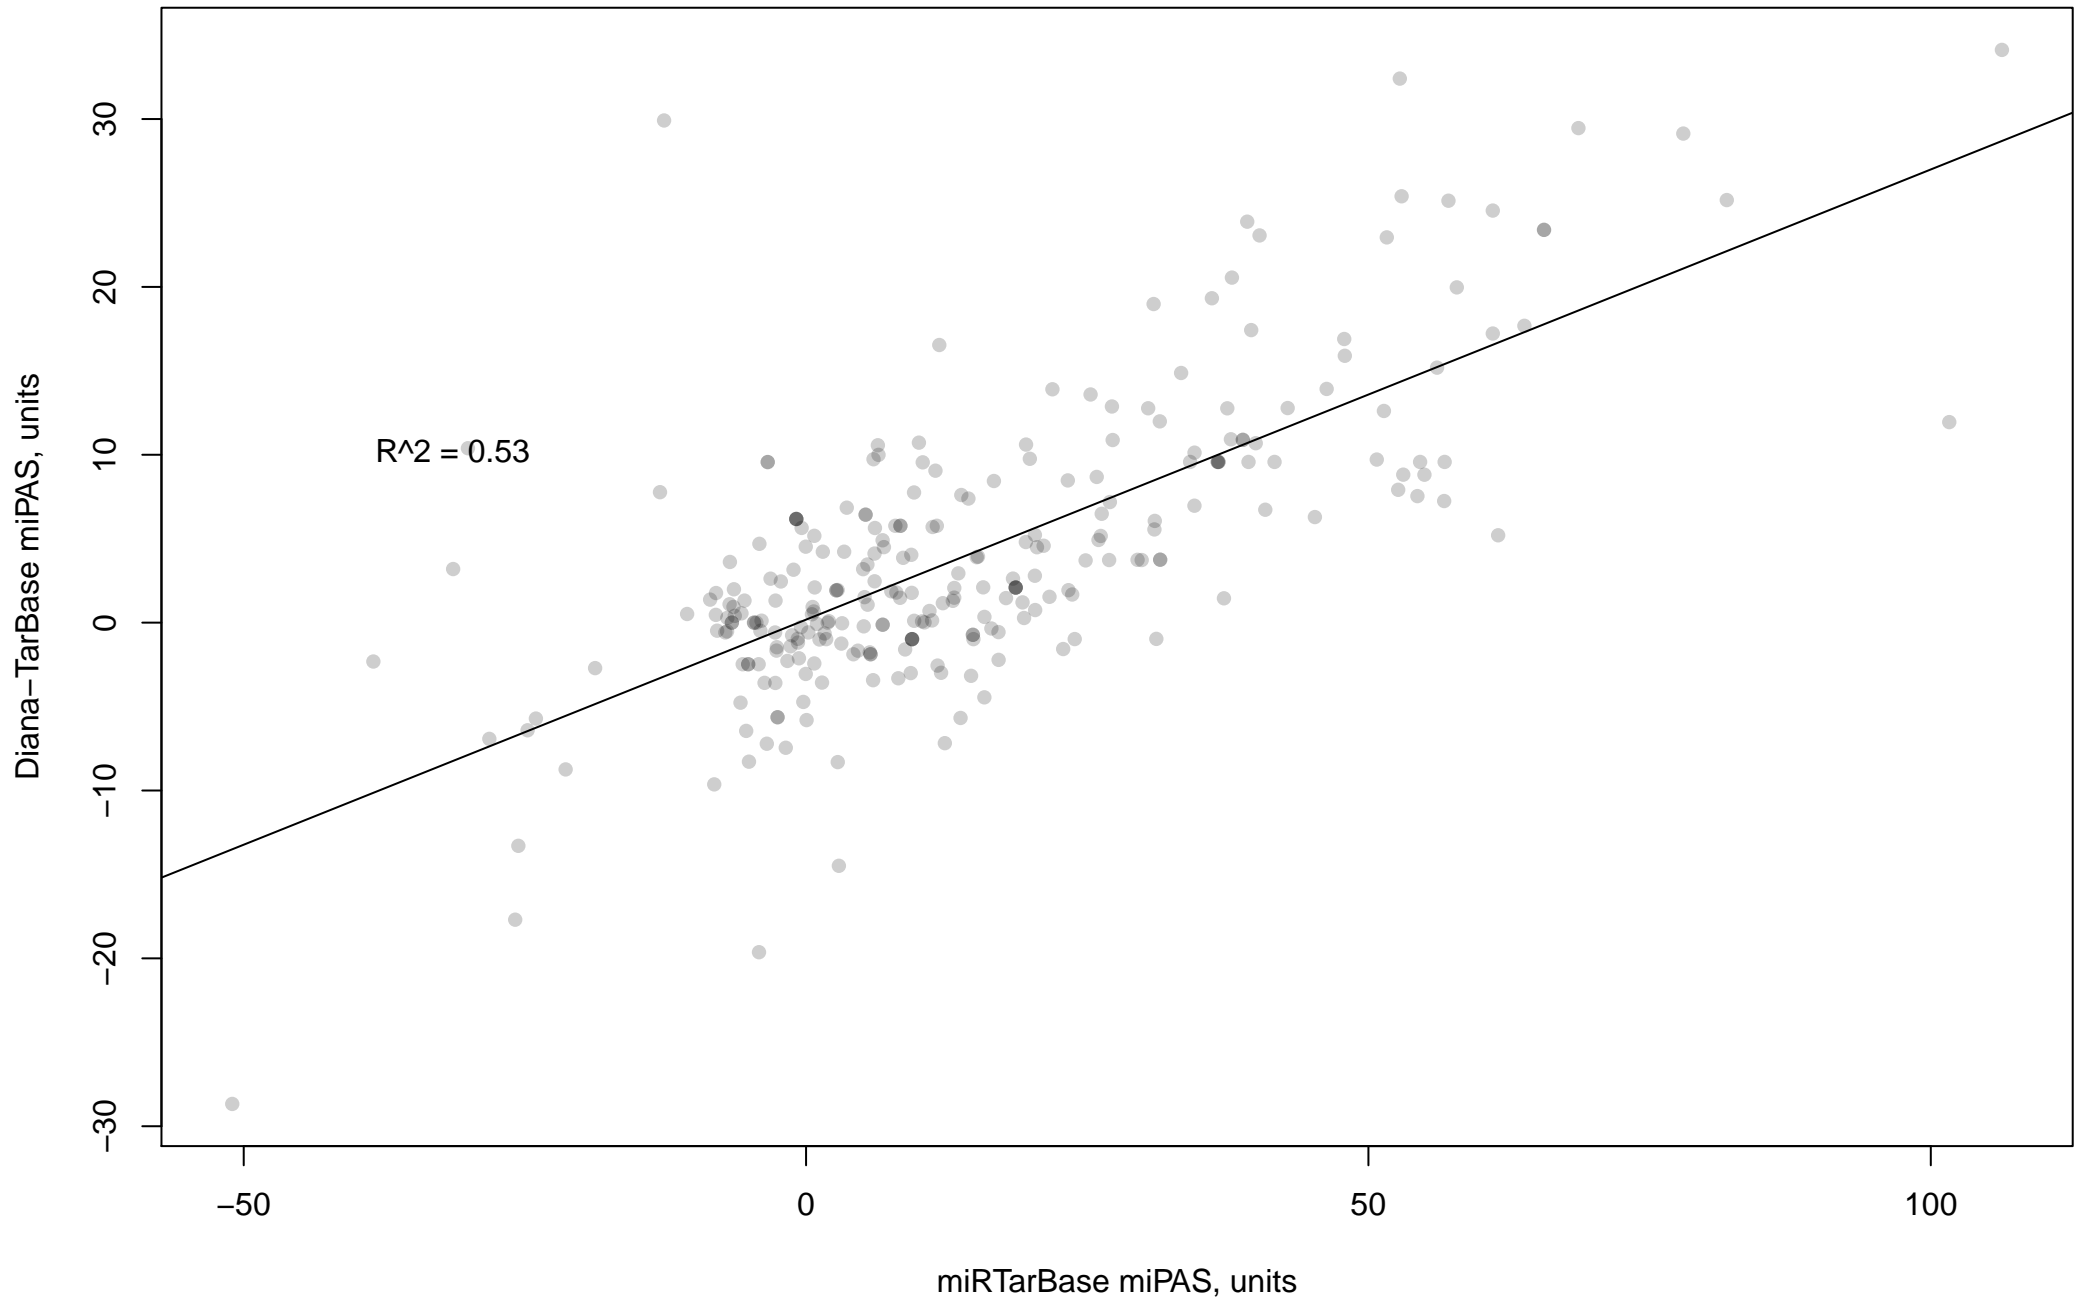

# Sample 2

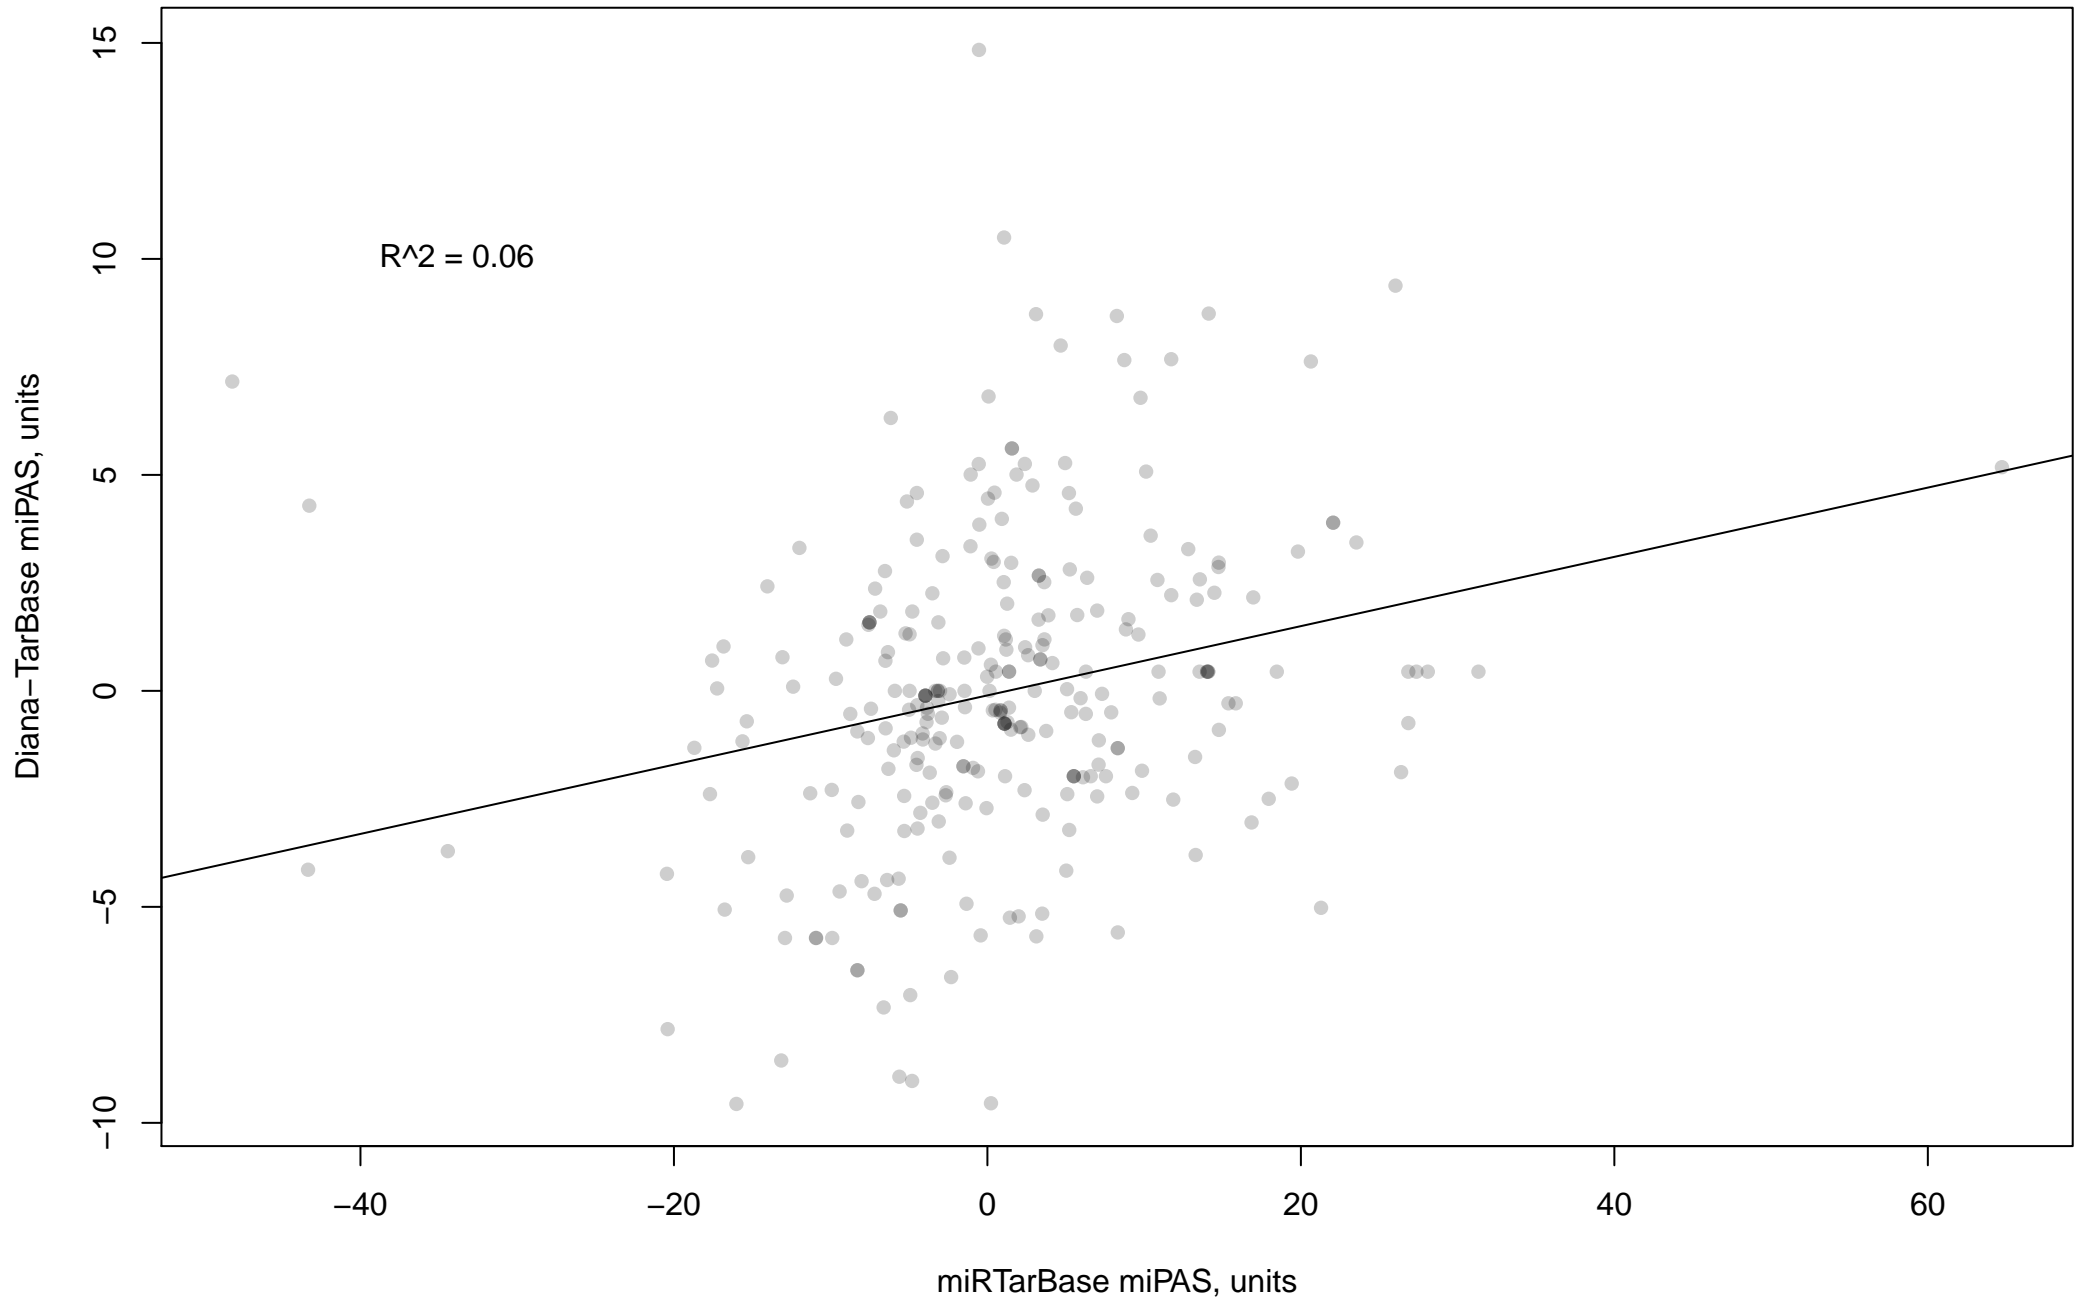

# Sample 3

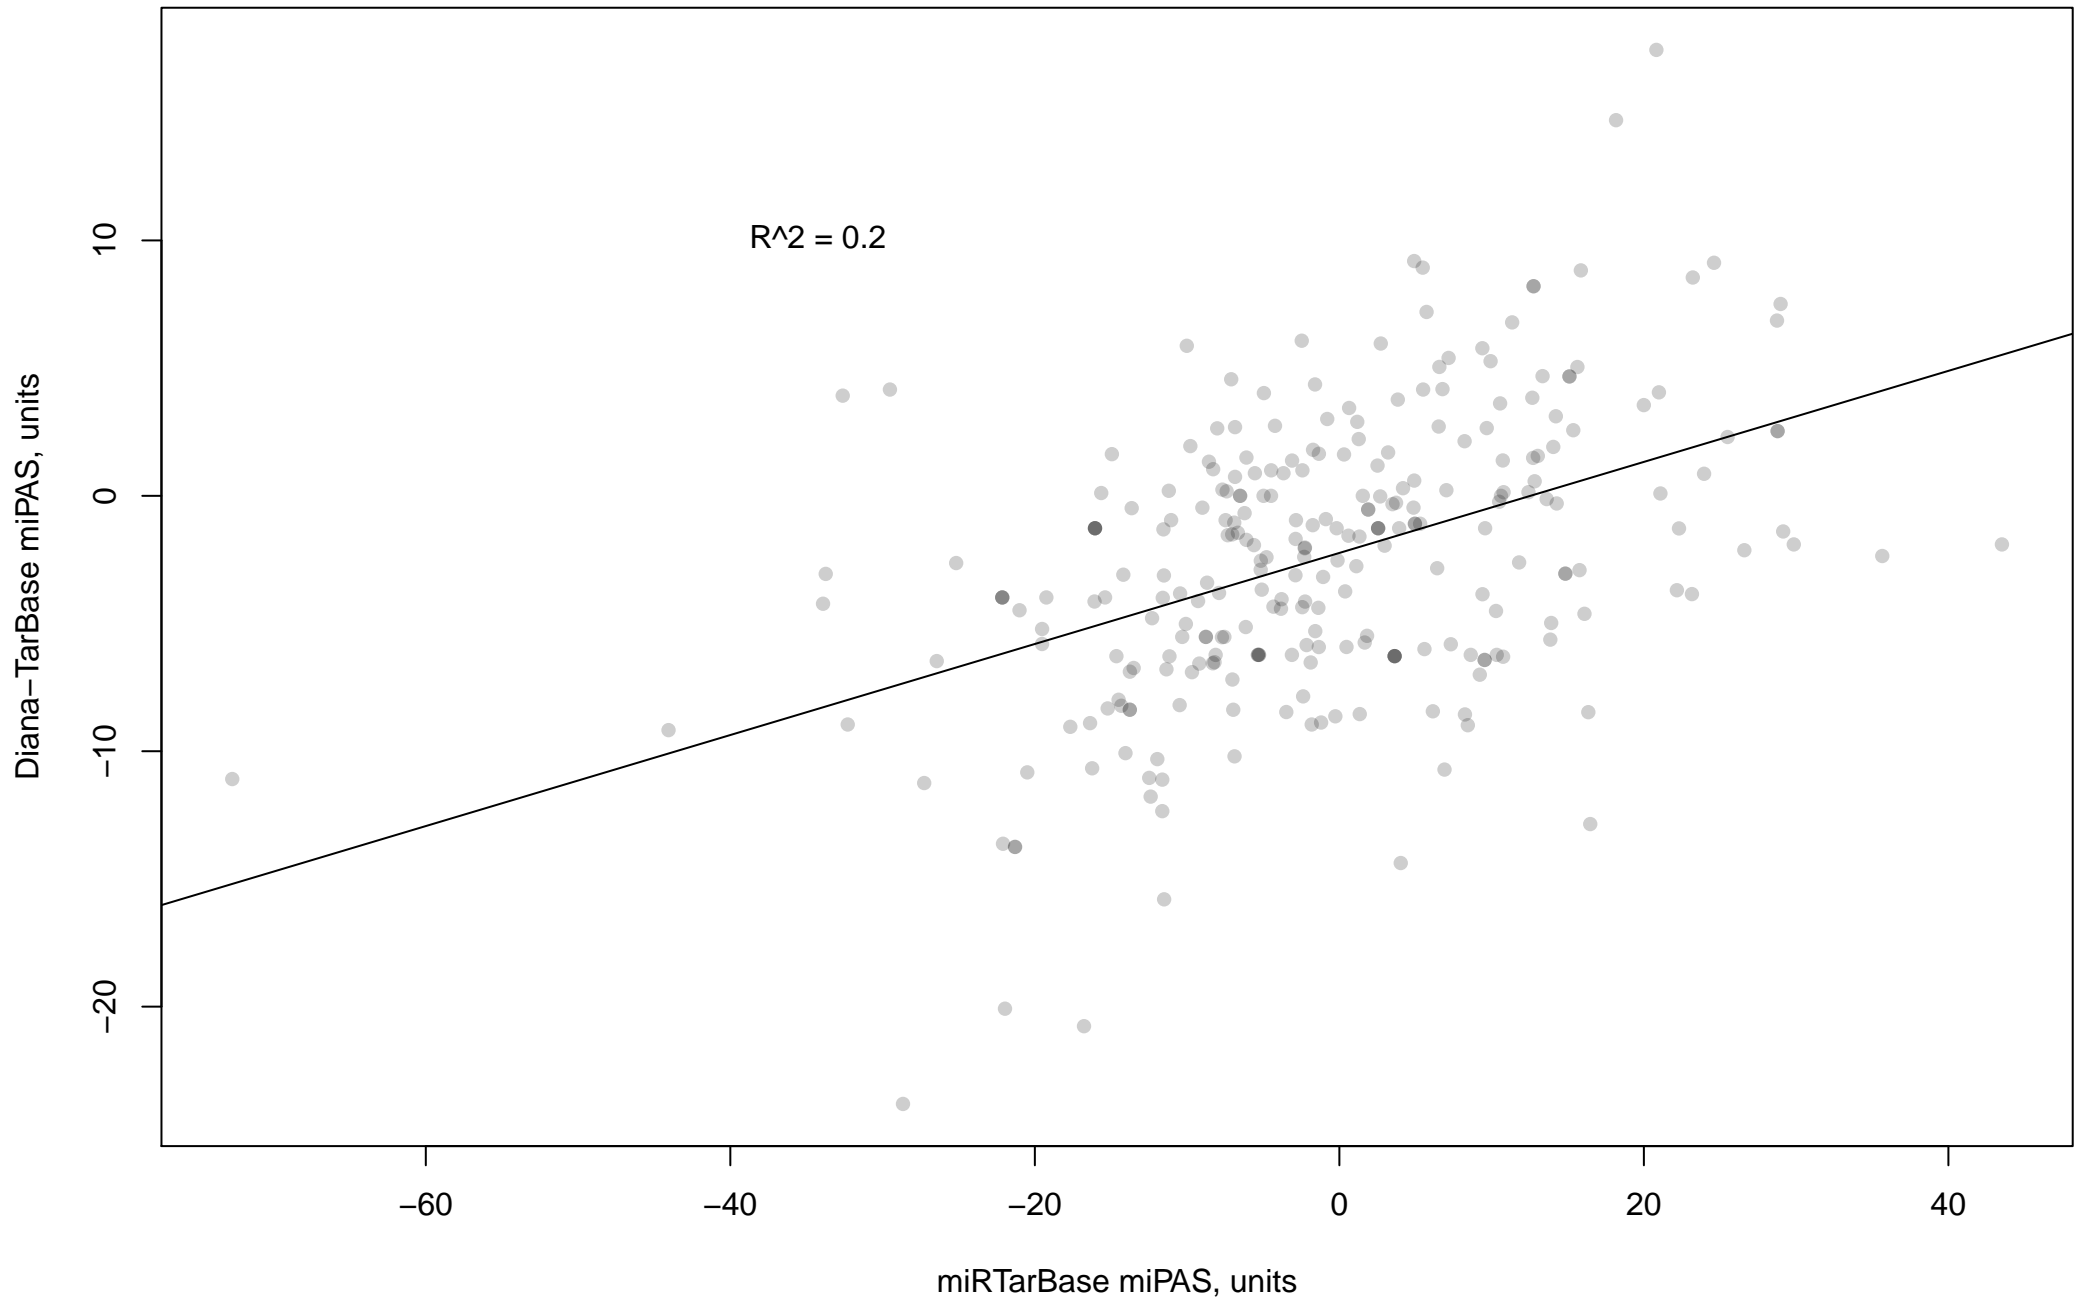

# Sample 4

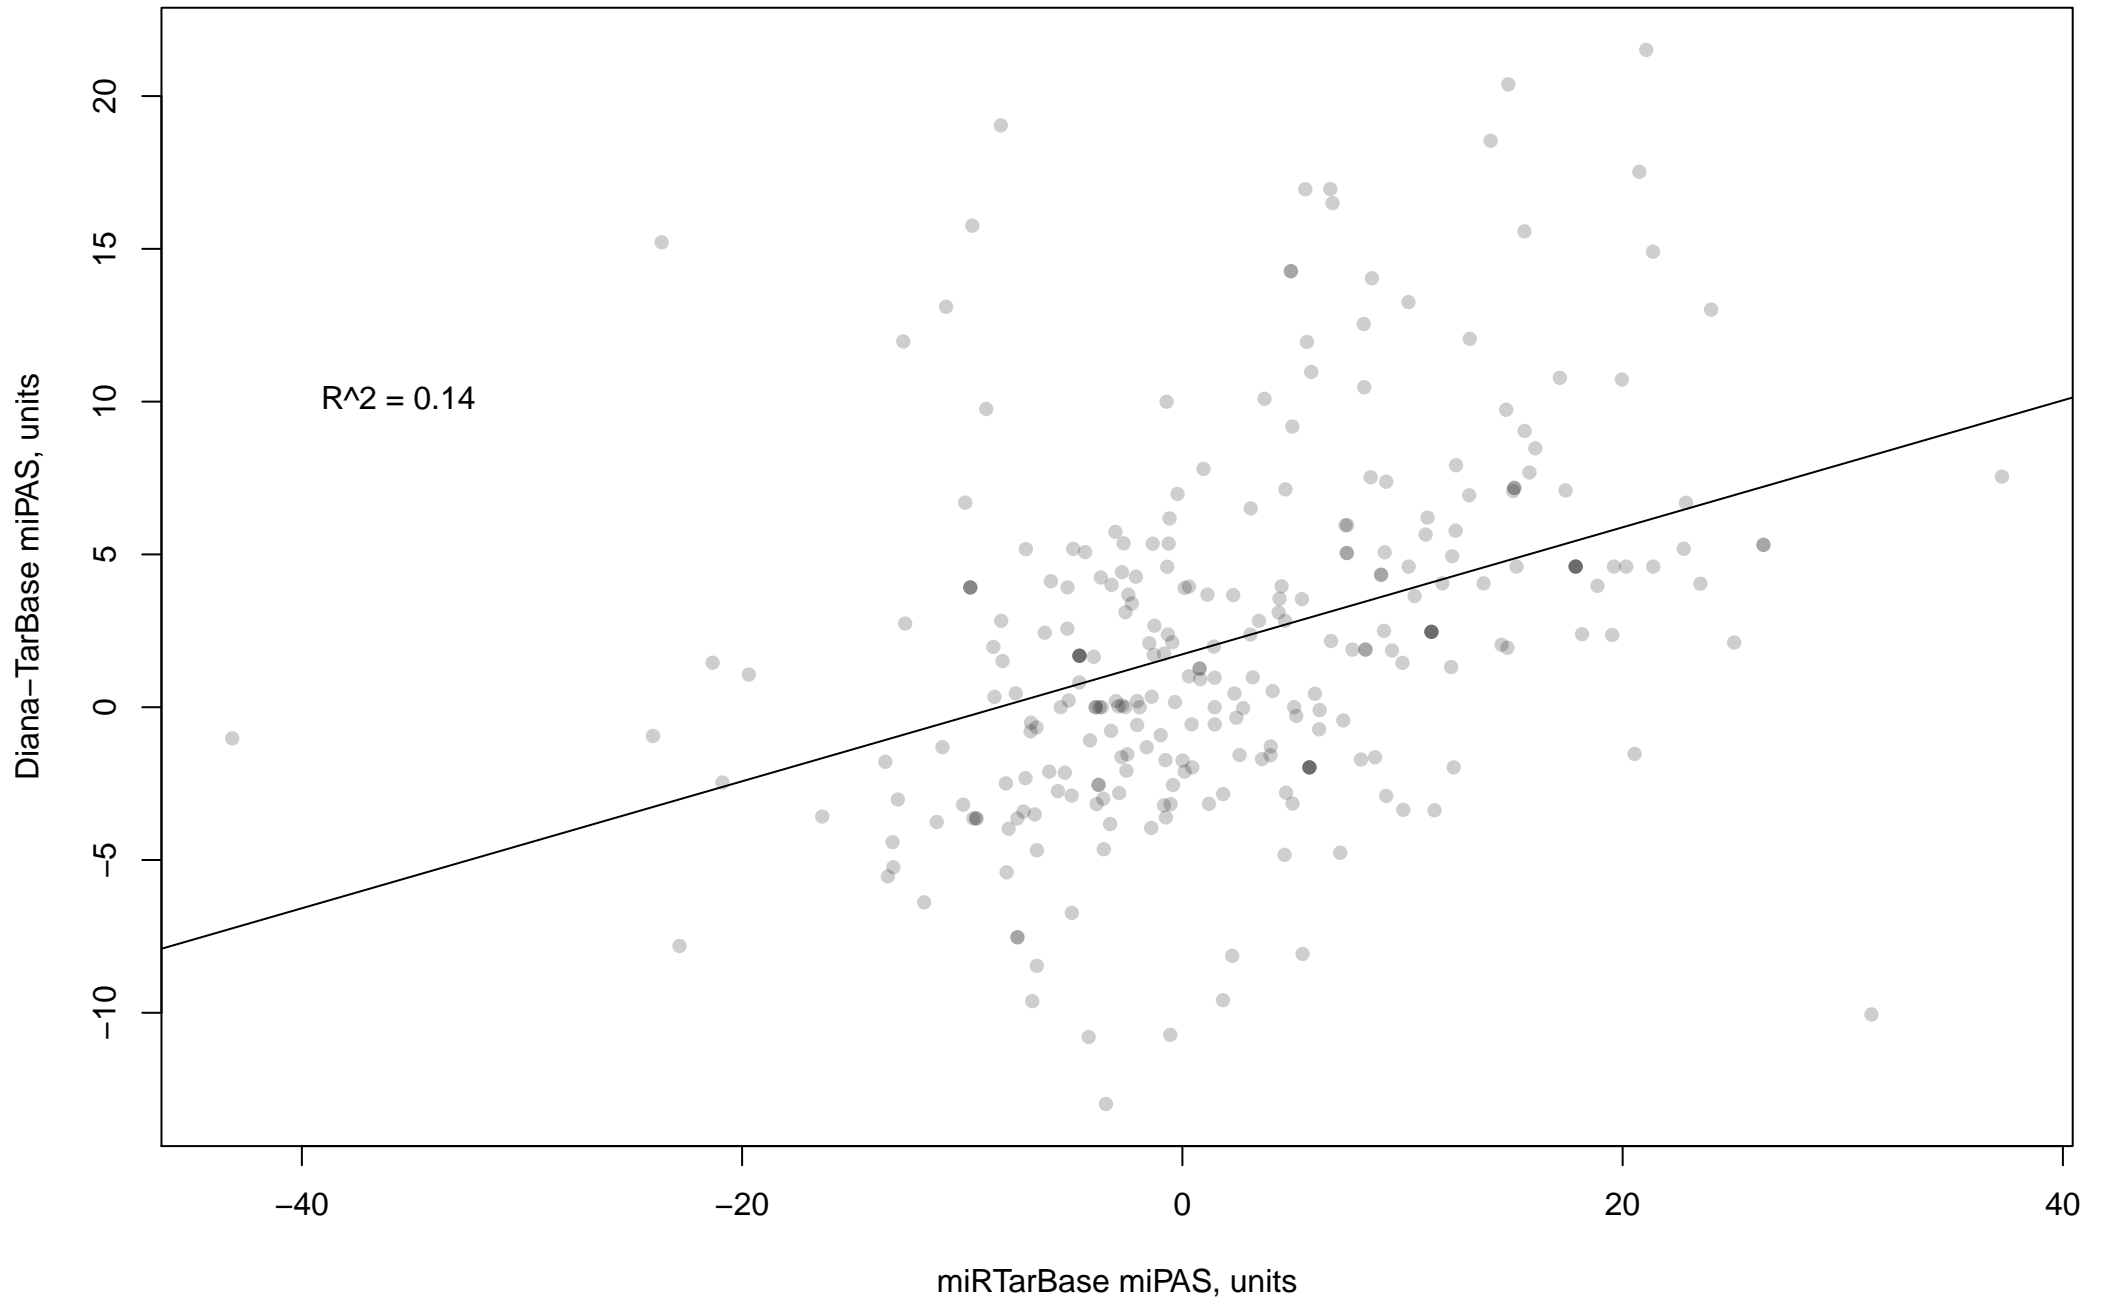

# Sample 5

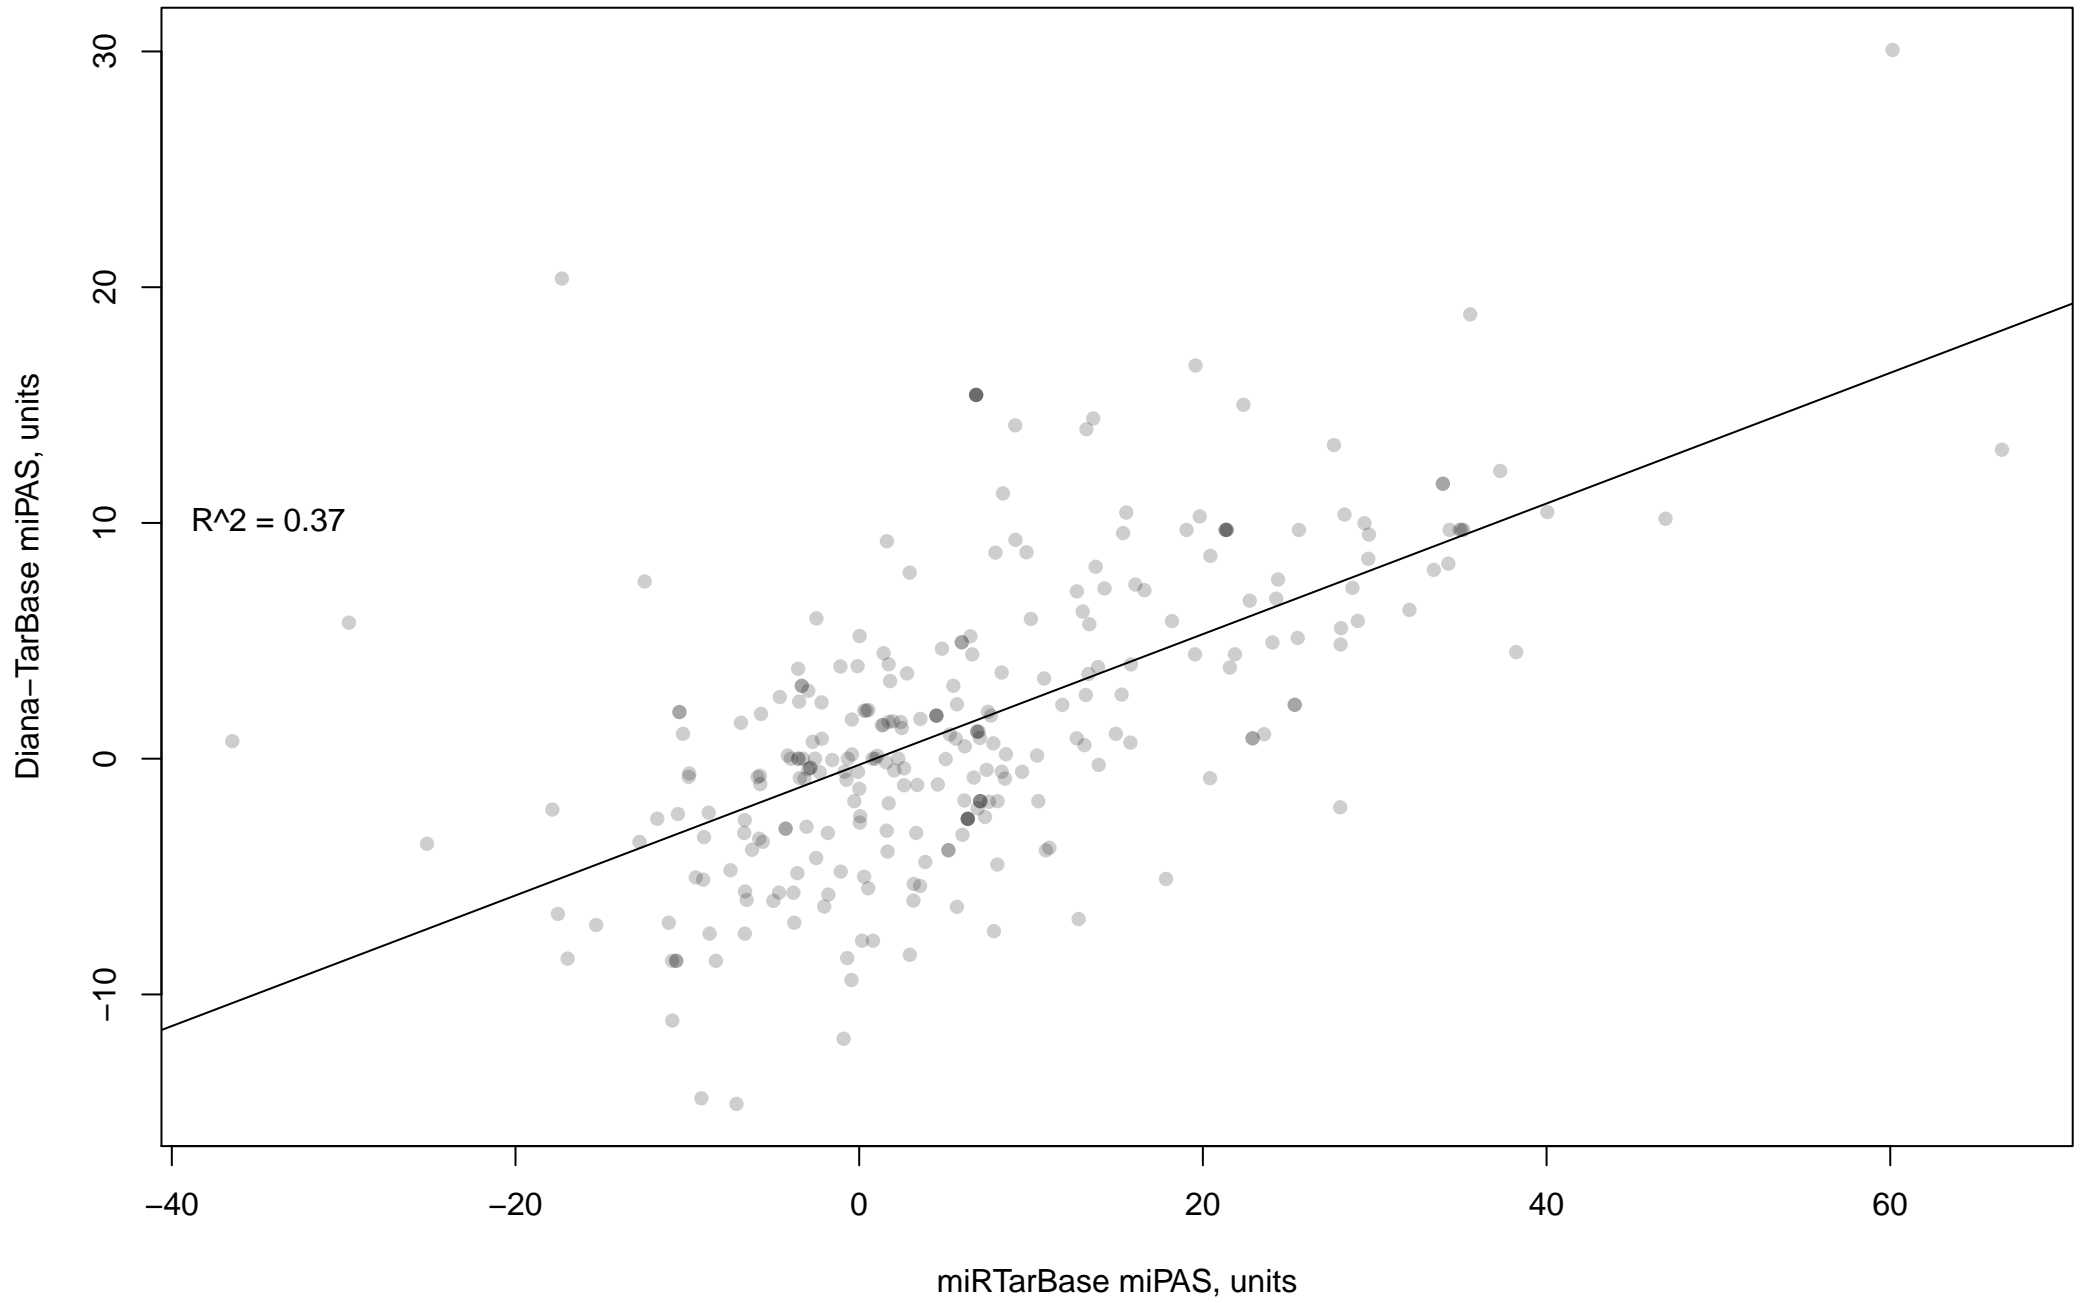

# Sample 6

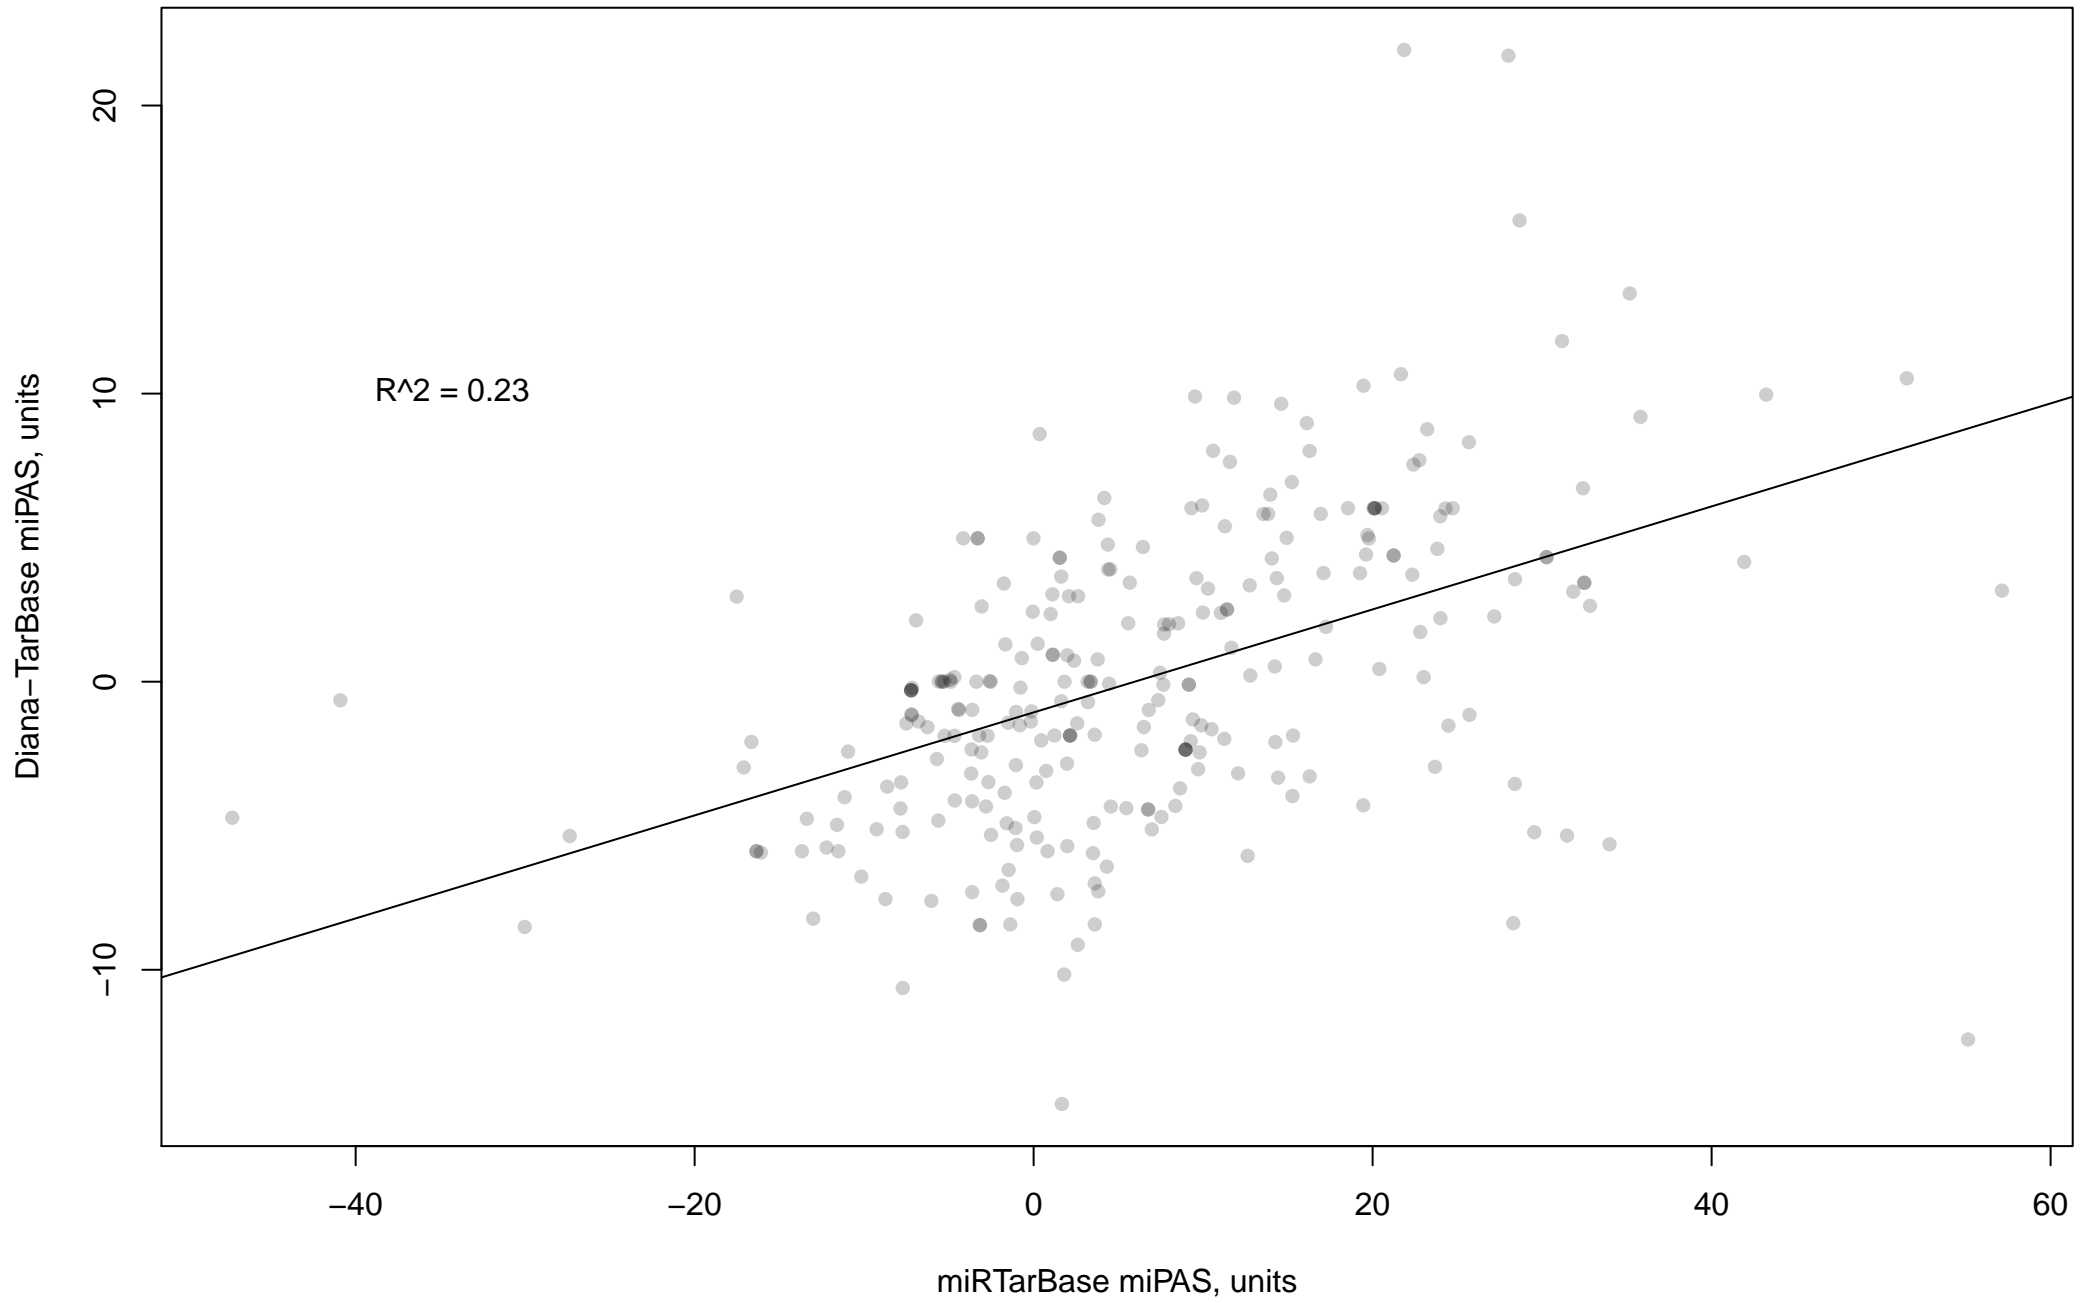

# Sample 7

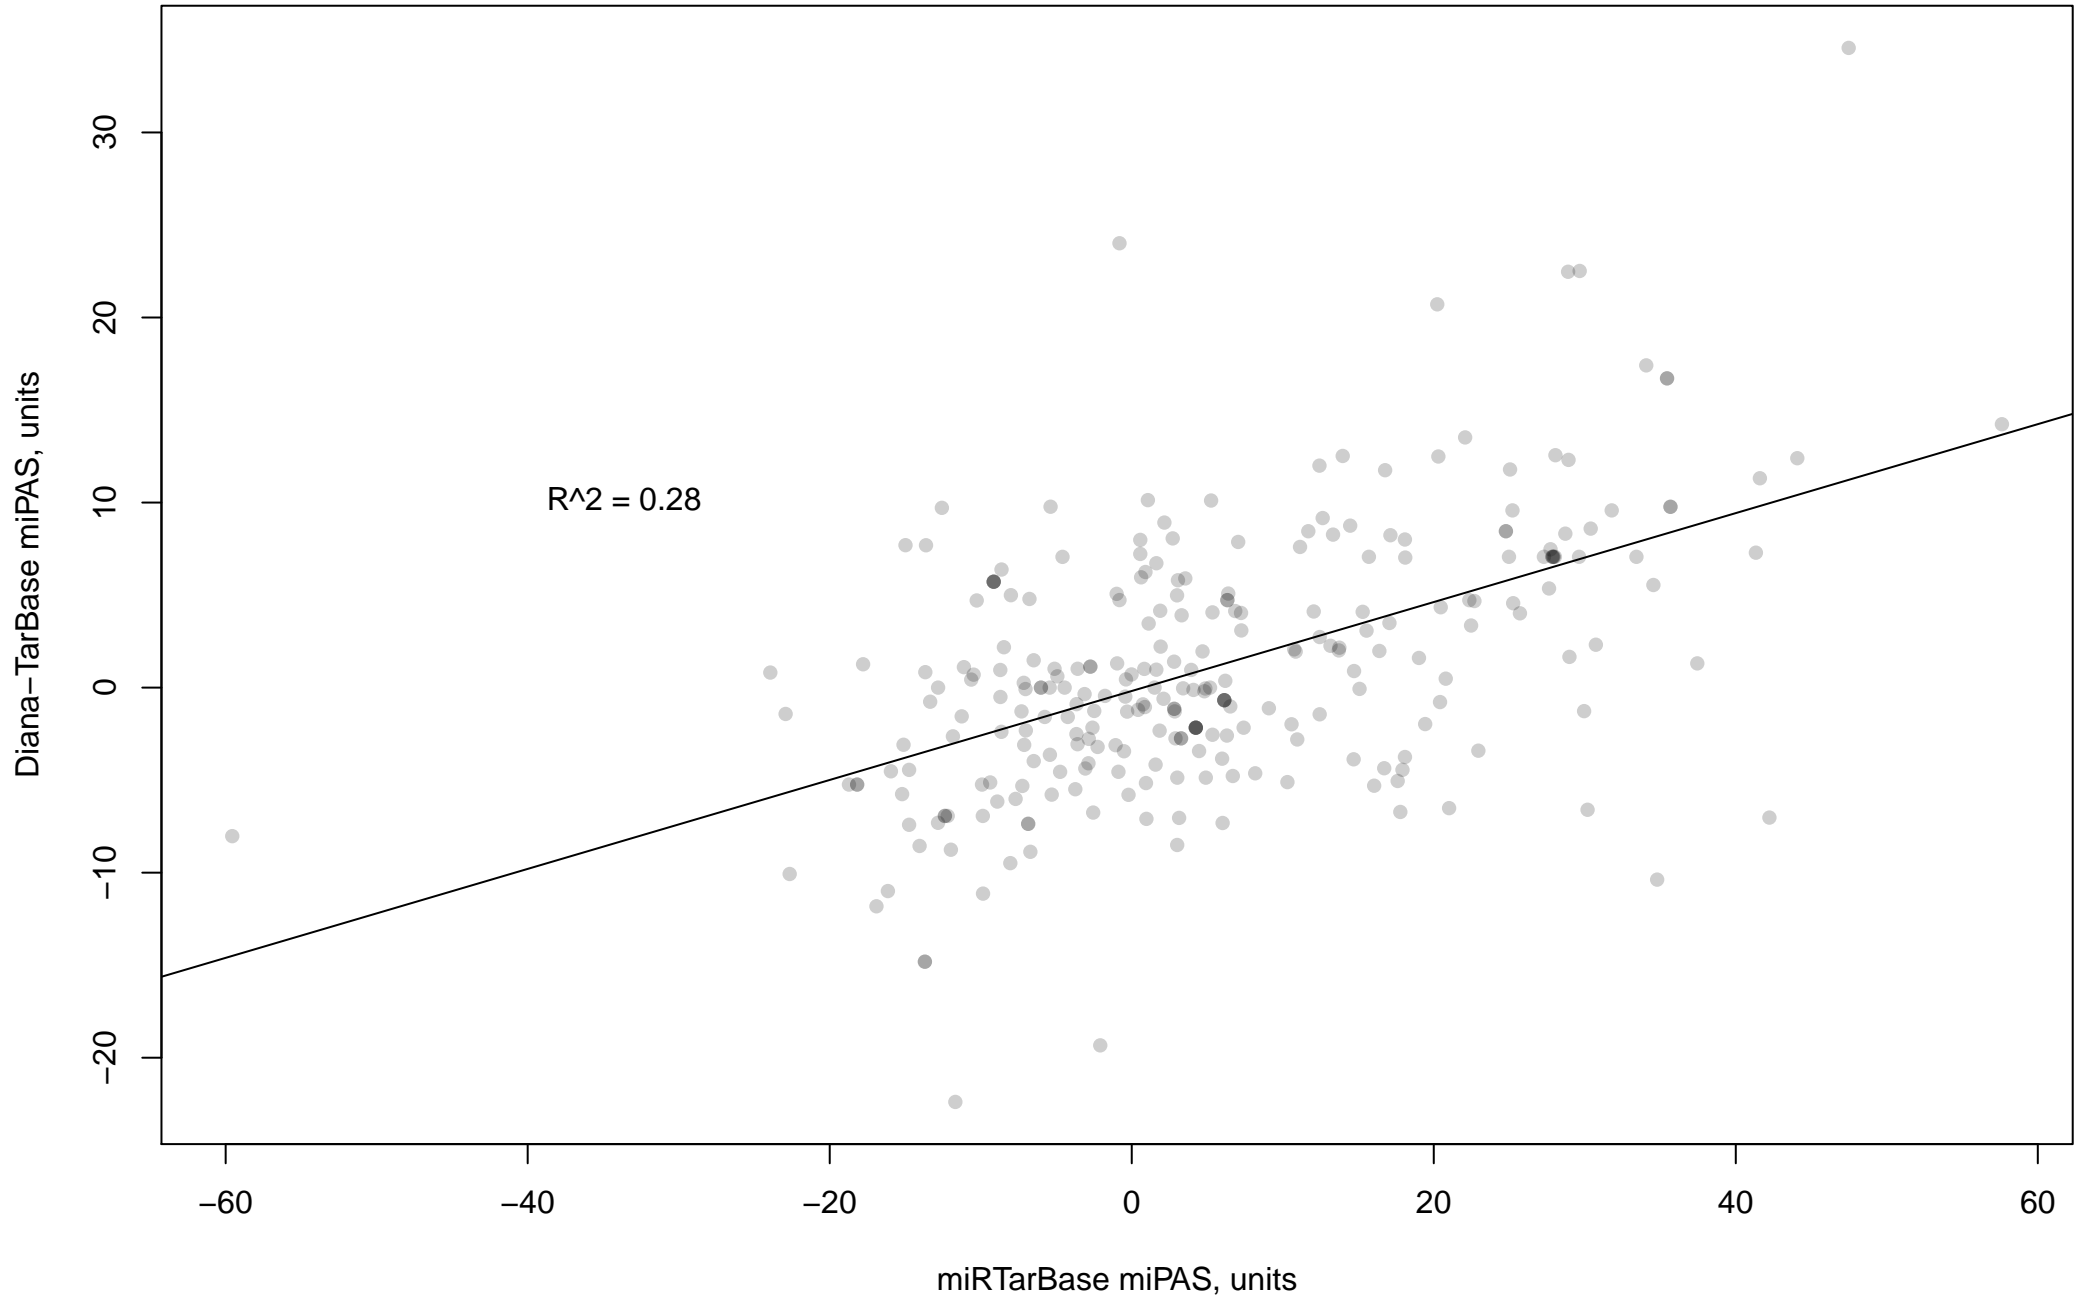

# Sample 8

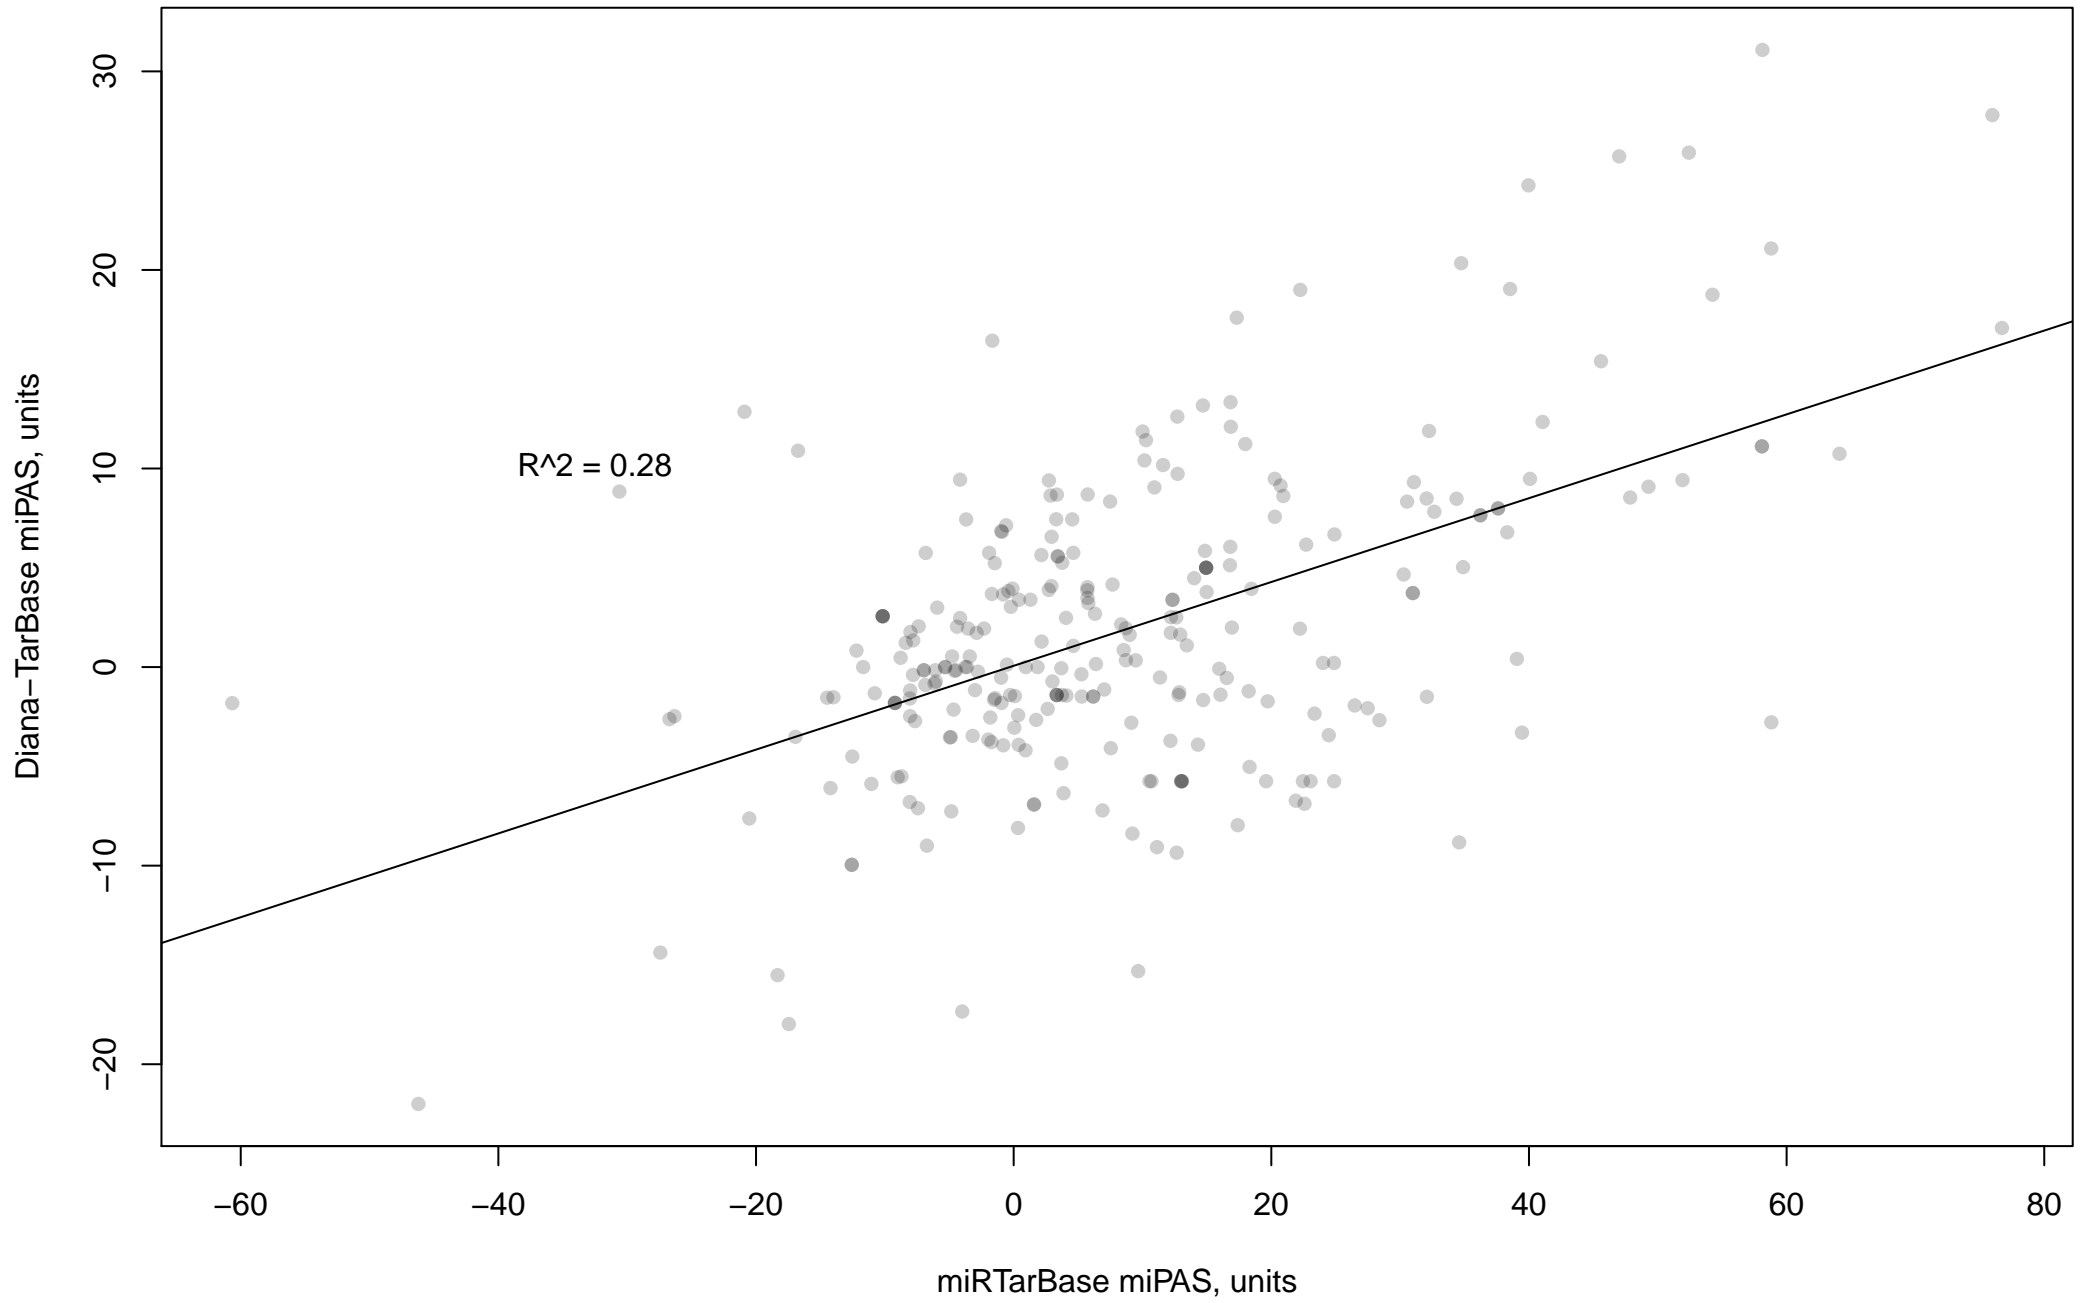



# AVG Sample miRTarBase

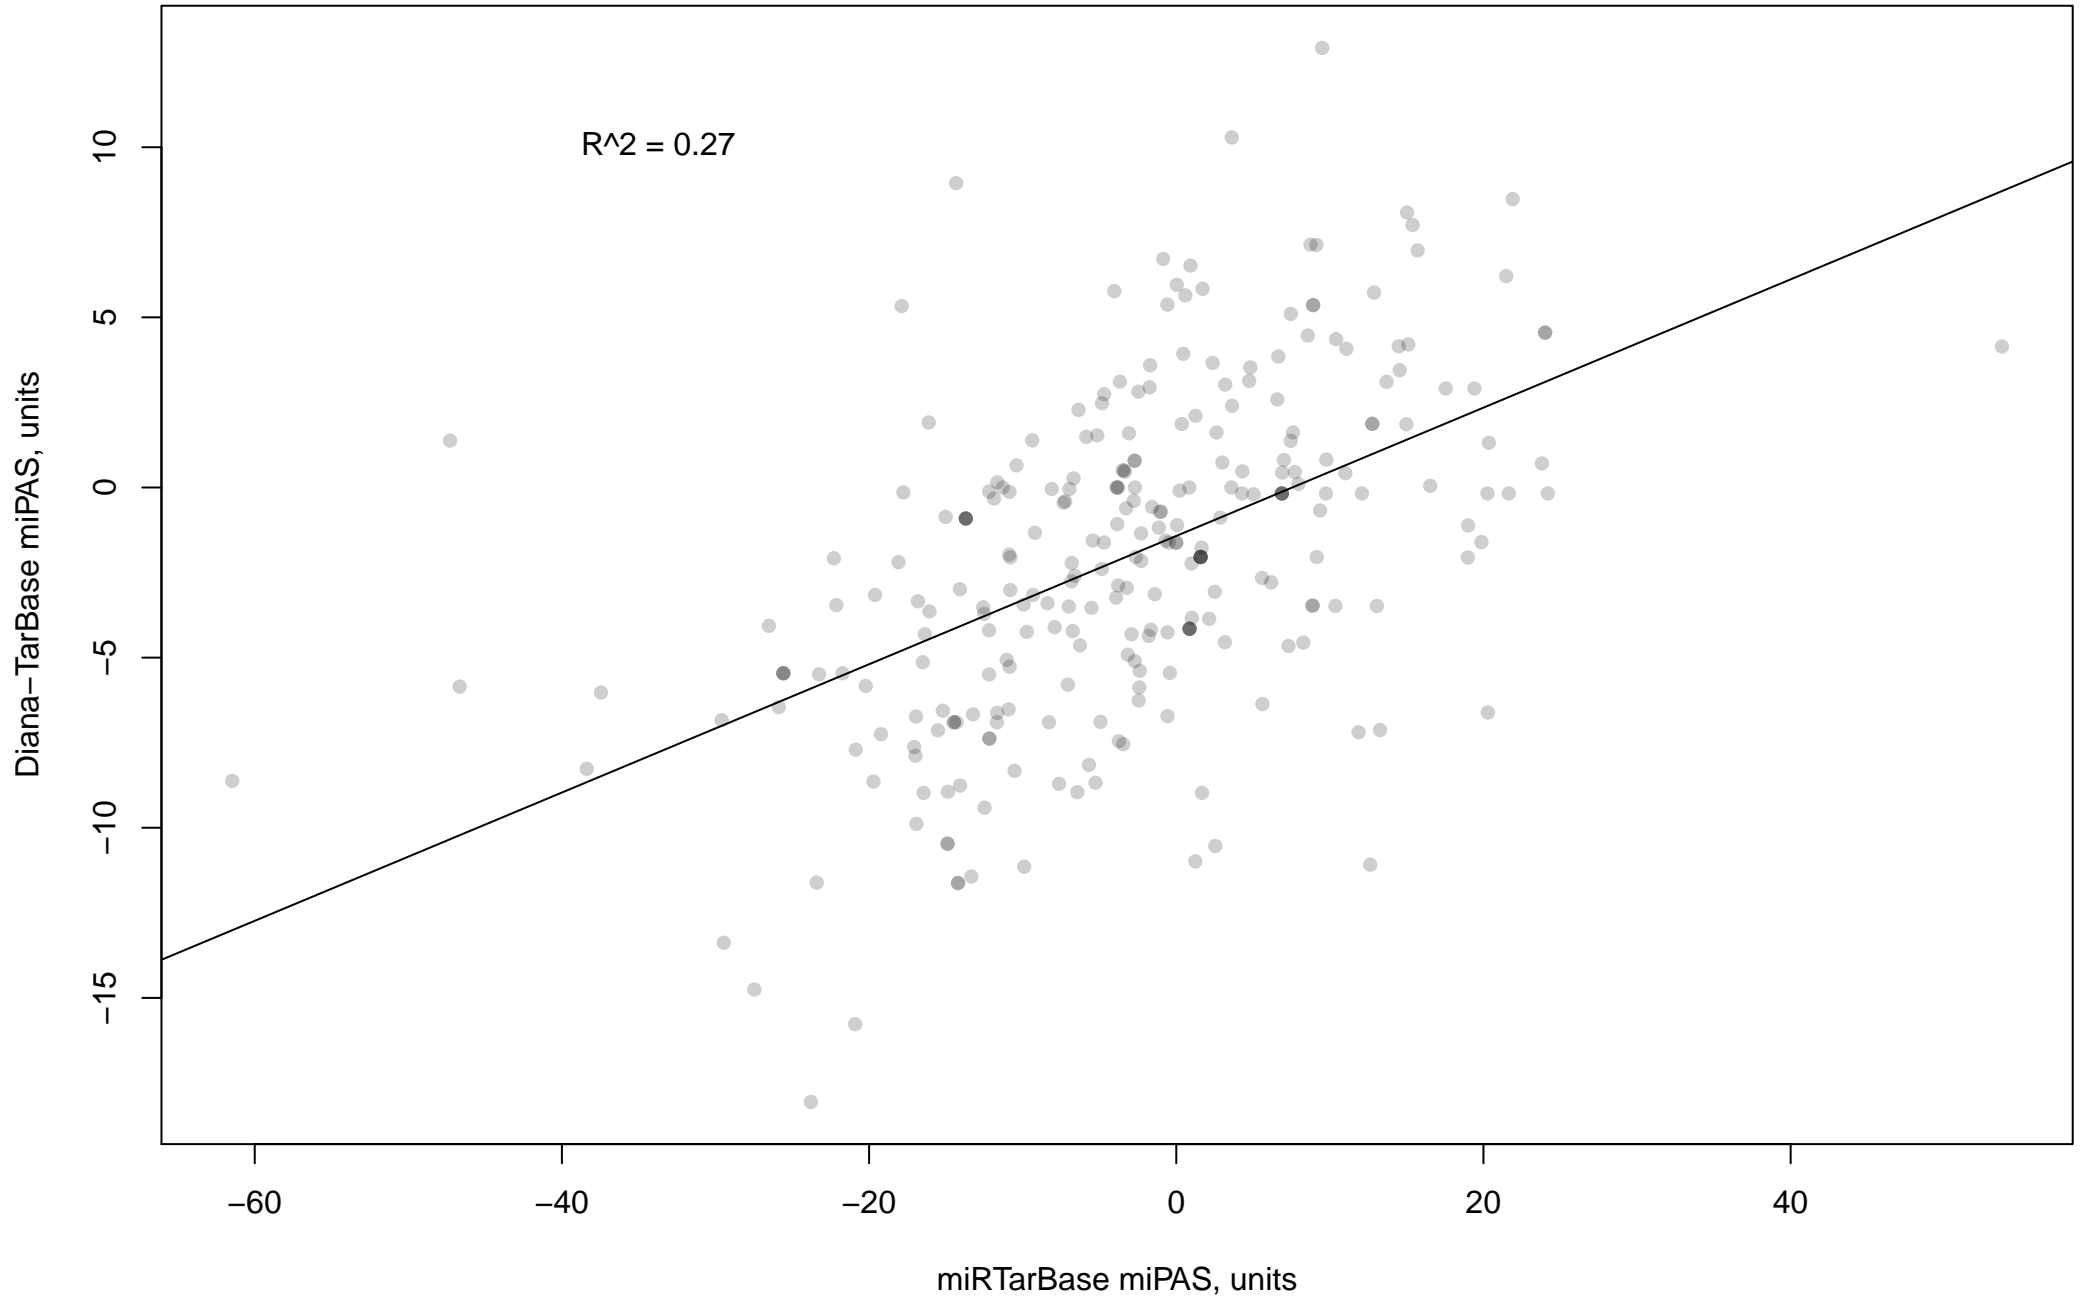

Supplement: kccy-15-05-1147633-s010.pdf [file kccy-15-05-1147633-s010.pdf]
